# Supplementary material for: Fine tuning the optical properties and Frontier orbital energy in pyrrolylenones as an example of D–π–A sensitizers via functionalization of the molecular backbone
Source: Royal Society of Chemistry journal article supplement (doi:10.1039/d4nj04962d), 2025-01-01
Supplement: d4nj04962d1.pdf [file d4nj04962d1.pdf]

## Supporting Information:

### Fine tuning the optical properties and frontier orbital energy in pyrrolylenones as an example of the D- $\pi$ -A sensitizer due to functionalization of molecular backbone

Andrei V. Afonin,<sup>1</sup> Danuta Rusinska-Roszak<sup>2</sup> and Dmitry V. Pavlov<sup>1</sup>

<sup>1</sup>Siberian Division of Russian Academy of Sciences, A. E. Favorsky Irkutsk Institute of Chemistry, 664033 Irkutsk, Russia; E-mail: andvalaf@irioch.irk.ru

<sup>2</sup>Institute of Chemical Technology and Engineering, Poznan University of Technology, Pl. M. Skłodowskiej-Curie 2, 60–965 Poznan, Poland; Email: [danuta.rusinska-roszak@put.poznan.pl](mailto:danuta.rusinska-roszak@put.poznan.pl)

| Contents                                                                                                                                                                                                              | Page      |
|-----------------------------------------------------------------------------------------------------------------------------------------------------------------------------------------------------------------------|-----------|
| <b>Table S1.</b> The value of Hammett constants <sup>a</sup> for the $R_1$ , $R_2$ and $R_3$ substituents                                                                                                             | S2        |
| <b>Figure S1.</b> Frontier orbitals of pyrrolylenones                                                                                                                                                                 | S3        |
| Equations to Figure 3                                                                                                                                                                                                 | S4        |
| <b>Table S2.</b> The calculated HOMO and LUMO energy, $\lambda_{\max}$ , absorption wavelength in pyrrolylenones for gas phase, chloroform and tetrahydrofuran.                                                       | S5        |
| <b>Figure S2.</b> Dependence of the $\Delta(\text{HOMO-LUMO})$ gap on the $\sigma_p$ Hammett constants for pyrrolylenones in the gas phase, chloroform and tetrahydrofuran.                                           | S6        |
| Equations to Figure 5                                                                                                                                                                                                 | S6        |
| <b>Figure S3.</b> Dependence of the $\lambda_{\max}$ wavelength on the $\sigma_p$ Hammett constants for pyrrolylenones in the gas phase, chloroform and tetrahydrofuran.                                              | S7        |
| Equations to Figure 7                                                                                                                                                                                                 | S7        |
| Equations to Figure 9                                                                                                                                                                                                 | S8        |
| <b>Figure S4.</b> Dependence of the HOMO energy on the $-E_{\pi}(\text{PPE})$ push-pull effect energy for pyrrolylenones                                                                                              | S8        |
| <b>Figure S5.</b> Dependence of the LUMO energy on the $-E_{\pi}(\text{PPE})$ push-pull effect energy for pyrrolylenones                                                                                              | S9        |
| <b>Figure S6.</b> Dependence of the $\Delta(\text{HOMO-LUMO})$ gap on the $-E_{\pi}(\text{PPE})$ push-pull effect energy for pyrrolylenones                                                                           | S10       |
| <b>Figure S7.</b> Dependence of the $\lambda_{\max}$ absorption wavelength on the $-E_{\pi}(\text{PPE})$ push-pull effect energy for pyrrolylenones                                                                   | S11       |
| The equations used for calculation of photovoltaic performance                                                                                                                                                        | S12       |
| <b>Table S3.</b> The calculated values of light-harvesting efficiency, open-circuit voltage, full factor of cell, free energy change for the electron-injection process and driving force of sensitizer regeneration. | S13, S14  |
| Equations to Figures 13 and 14                                                                                                                                                                                        | S15, S16  |
| <b>atom coordinates</b>                                                                                                                                                                                               | S17 – S71 |

**Table S1.** The value of Hammett constants<sup>a</sup> for the  $R_1$ ,  $R_2$  and  $R_3$  substituents for studied pyrrolylenones **1–111**

| Substituent          | Hammett constants, $\sigma_p$ |
|----------------------|-------------------------------|
| $N(C_3H_7)_2$        | -0.93                         |
| $N(CH_3)_2$          | -0.83                         |
| $NHCH_3$             | -0.70                         |
| $NH_2$               | -0.66                         |
| $NHNH_2$             | -0.55                         |
| $OH$                 | -0.37                         |
| $OCH_3$              | -0.27                         |
| $CH_3$               | -0.17                         |
| $CH_2C_6H_5$         | -0.09                         |
| $H$                  | 0.00                          |
| $F$                  | 0.06                          |
| $SH$                 | 0.15                          |
| $Cl$                 | 0.23                          |
| $N=C=S$              | 0.38                          |
| $CHO$                | 0.42                          |
| $CCl_3$              | 0.46                          |
| $CF_3$               | 0.54                          |
| $SiCl_3$             | 0.56                          |
| $CN$                 | 0.66                          |
| $NO_2$               | 0.78                          |
| $P(O)Cl_2$           | 0.90                          |
| $C(CN)_3$            | 0.96                          |
| $GeF_3$              | 0.97                          |
| $SO_2Cl$             | 1.11                          |
| $SO_2CN$             | 1.26                          |
| $N\equiv N^{\oplus}$ | 1.91                          |

<sup>a</sup>Taken from ref. C.Hansch, A. Leo and R.W. Taft, *Chem. Rev.*, 1991, **91**, 165–195.

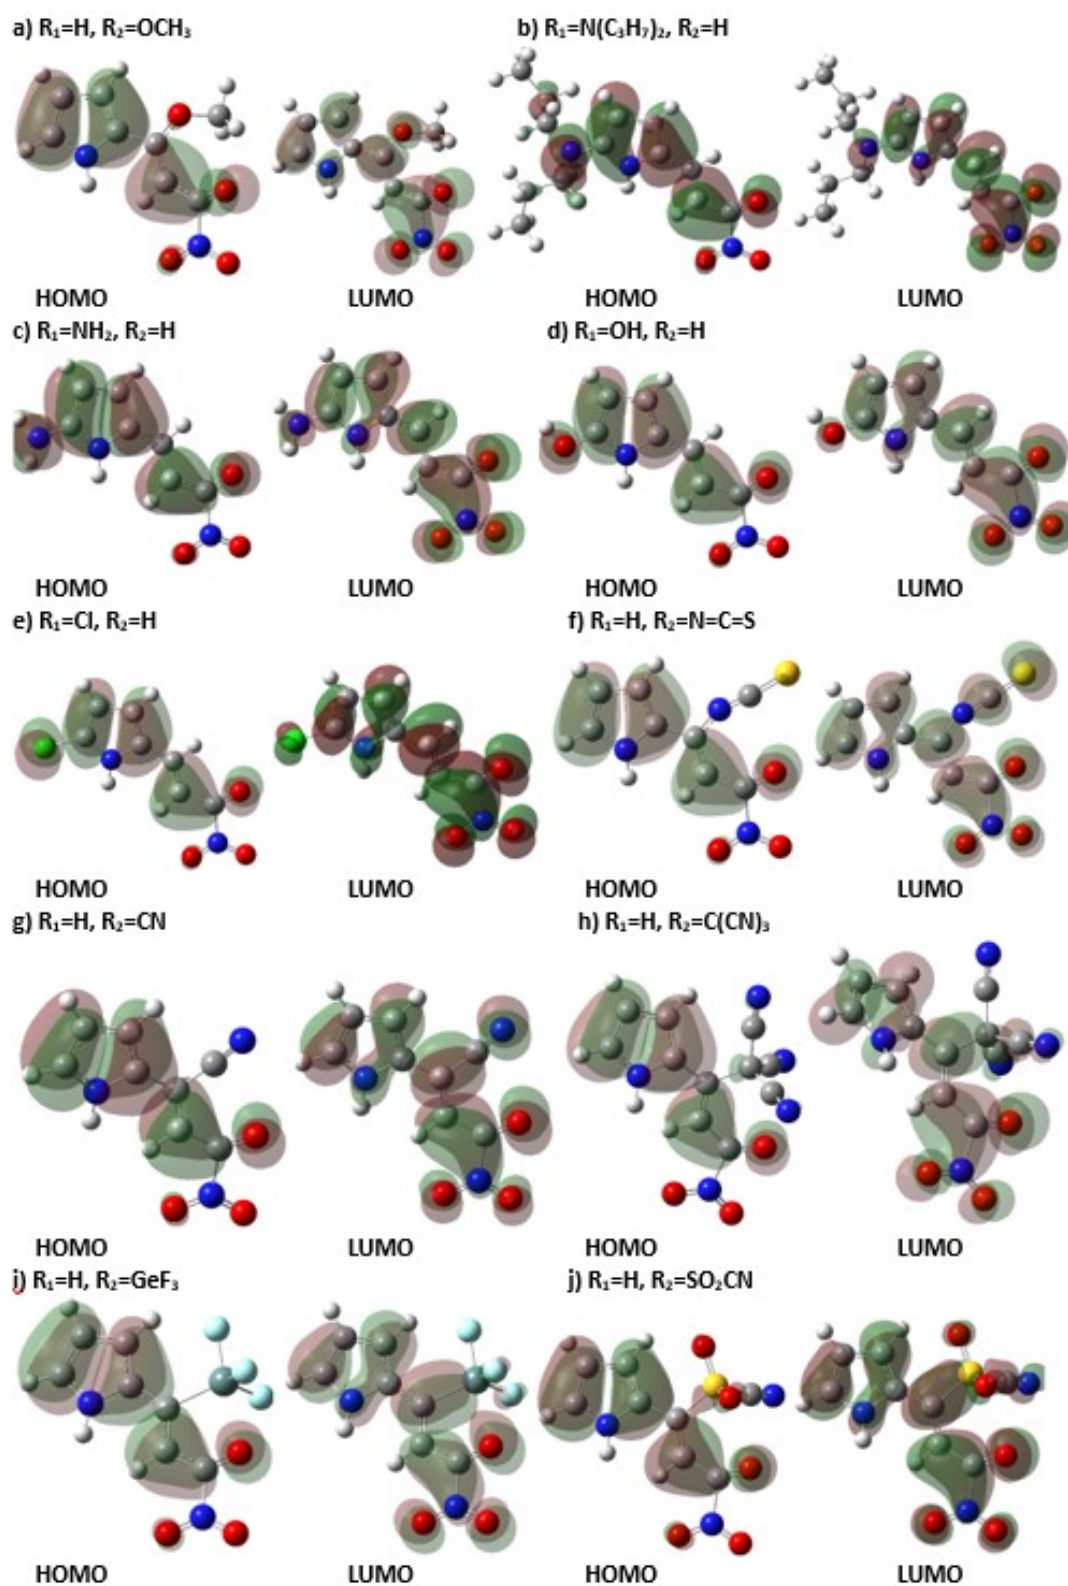

**Fig. S1** Frontier orbitals of pyrrolylenones 13 (a), 17 (b), 19 (c) and 20 (d), 22 (e), 29 (f), 45 (g), 61 (h), 69 (i), 77 (j)

Equations to Figure 3:

Part a)

1.  $R_1=N(C_3H_7)_2$ ,  $R_2$  varied  
HOMO (energy) =  $-0.42 \times \sigma_p - 5.70$ ,  $r=0.946$  (S1)

2.  $R_1=N(CH_3)_2$ ,  $R_2$  varied  
HOMO (energy) =  $-0.42 \times \sigma_p - 5.84$ ,  $r=0.943$  (S2)

3.  $R_1=NH_2$ ,  $R_2$  varied  
HOMO (energy) =  $-0.39 \times \sigma_p - 6.16$ ,  $r=0.931$  (S3)

4.  $R_1=OH$ ,  $R_2$  varied  
HOMO (energy) =  $-0.44 \times \sigma_p - 6.48$ ,  $r=0.925$  (S4)

5.  $R_1=H$ ,  $R_2$  varied  
HOMO (energy) =  $-0.45 \times \sigma_p - 6.87$ ,  $r=0.923$  (S5)

6.  $R_1=Cl$ ,  $R_2$  varied  
HOMO (energy) =  $-0.42 \times \sigma_p - 6.89$ ,  $r=0.925$  (S6)

7.  $R_1=CHO$ ,  $R_2$  varied  
HOMO (energy) =  $-0.40 \times \sigma_p - 7.30$ ,  $r=0.895$  (S7)

8.  $R_1=NO_2$ ,  $R_2$  varied  
HOMO (energy) =  $-0.44 \times \sigma_p - 7.63$ ,  $r=0.907$  (S8)

Part b)

1.  $R_1=N(C_3H_7)_2$ ,  $R_2$  varied  
LUMO (energy) =  $-0.75 \times \sigma_p - 2.71$ ,  $r=0.986$  (S9)

2.  $R_1=N(CH_3)_2$ ,  $R_2$  varied  
LUMO (energy) =  $-0.77 \times \sigma_p - 2.81$ ,  $r=0.989$  (S10)

3.  $R_1=NH_2$ ,  $R_2$  varied  
LUMO (energy) =  $-0.81 \times \sigma_p - 2.96$ ,  $r=0.991$  (S11)

4.  $R_1=OH$ ,  $R_2$  varied  
LUMO (energy) =  $-0.83 \times \sigma_p - 3.13$ ,  $r=0.986$  (S12)

5.  $R_1=H$ ,  $R_2$  varied  
LUMO (energy) =  $-0.91 \times \sigma_p - 3.27$ ,  $r=0.986$  (S13)

6.  $R_1=Cl$ ,  $R_2$  varied  
LUMO (energy) =  $-0.88 \times \sigma_p - 3.39$ ,  $r=0.987$  (S14)

7.  $R_1=CHO$ ,  $R_2$  varied  
LUMO (energy) =  $-0.82 \times \sigma_p - 3.79$ ,  $r=0.965$  (S15)

8.  $R_1=NO_2$ ,  $R_2$  varied  
LUMO (energy) =  $-0.77 \times \sigma_p - 4.12$ ,  $r=0.986$  (S16)

Part c)

1.  $R_1=N(C_3H_7)_2$ ,  $R_2$  varied  
 $\Delta(\text{HOMO-LUMO}) = -0.15 \times \sigma_p^2 - 0.31 \times \sigma_p + 3.04$ ,  $r=0.941$  (S17)

2.  $R_1=N(CH_3)_2$ ,  $R_2$  varied  
 $\Delta(\text{HOMO-LUMO}) = -0.14 \times \sigma_p^2 - 0.33 \times \sigma_p + 3.09$ ,  $r=0.938$  (S18)

3.  $R_1=NH_2$ ,  $R_2$  varied  
 $\Delta(\text{HOMO-LUMO}) = -0.10 \times \sigma_p^2 - 0.43 \times \sigma_p + 3.25$ ,  $r=0.946$  (S19)

4.  $R_1=OH$ ,  $R_2$  varied  
 $\Delta(\text{HOMO-LUMO}) = -0.14 \times \sigma_p^2 - 0.37 \times \sigma_p + 3.41$ ,  $r=0.949$  (S20)

5.  $R_1=H$ ,  $R_2$  varied  
 $\Delta(\text{HOMO-LUMO}) = -0.07 \times \sigma_p^2 - 0.49 \times \sigma_p + 3.64$ ,  $r=0.930$  (S21)

6.  $R_1=Cl$ ,  $R_2$  varied  
 $\Delta(\text{HOMO-LUMO}) = -0.11 \times \sigma_p^2 - 0.47 \times \sigma_p + 3.55$ ,  $r=0.949$  (S22)

7.  $R_1=CHO$ ,  $R_2$  varied  
 $\Delta(\text{HOMO-LUMO}) = -0.10 \times \sigma_p^2 - 0.43 \times \sigma_p + 3.56$ ,  $r=0.940$  (S23)

8.  $R_1=NO_2$ ,  $R_2$  varied  
 $\Delta(\text{HOMO-LUMO}) = -0.16 \times \sigma_p^2 - 0.26 \times \sigma_p + 3.57$ ,  $r=0.935$  (S24)

**Table S2.** The calculated HOMO and LUMO energy (in eV),  $\Delta(\text{HOMO-LUMO})$  gap (in eV),  $\lambda_{\text{max}}$ , absorption wavelength (in nm),  $f$  oscillator strength, main assignment to transition type (HOMO $\rightarrow$  LUMO, contribution in parentheses, %), for pyrrolylenones **5**, **13**, **21**, **29**, **37**, **45**, **53**, **61**, **69**, **77** in gas phase, chloroform ( $\epsilon=4.8$ ), tetrahydrofuran ( $\epsilon=7.6$ ).

| No comp   | R <sub>2</sub>      | $\sigma_p$ | gas    |        |       |                        |      |      | chloroform ( $\epsilon=4.8$ ) |        |       |                        |      |      | tetrahydrofuran ( $\epsilon=7.6$ ) |        |       |                        |      |      |
|-----------|---------------------|------------|--------|--------|-------|------------------------|------|------|-------------------------------|--------|-------|------------------------|------|------|------------------------------------|--------|-------|------------------------|------|------|
|           |                     |            | HOMO   | LUMO   | gap   | $\lambda_{\text{max}}$ | f    | %    | HOMO                          | LUMO   | gap   | $\lambda_{\text{max}}$ | f    | %    | HOMO                               | LUMO   | gap   | $\lambda_{\text{max}}$ | f    | %    |
| <b>5</b>  | NHCH <sub>3</sub>   | -0.7       | -6.667 | -2.612 | 4.055 | 339.39                 | 0.32 | 95.5 | -6.486                        | -2.722 | 3.764 | 382.05                 | 0.28 | 96.7 | -6.466                             | -2.750 | 3.716 | 387.57                 | 0.26 | 97.2 |
| <b>13</b> | OCH <sub>3</sub>    | -0.27      | -6.748 | -2.993 | 3.755 | 353.63                 | 0.39 | 94.4 | -6.562                        | -3.032 | 3.529 | 396.42                 | 0.38 | 96.8 | -6.541                             | -3.047 | 3.493 | 400.72                 | 0.36 | 96.9 |
| <b>21</b> | H                   | 0          | -6.803 | -3.293 | 3.510 | 366.51                 | 0.46 | 94.0 | -6.525                        | -3.282 | 3.242 | 417.87                 | 0.46 | 96.3 | -6.496                             | -3.290 | 3.205 | 422.79                 | 0.44 | 96.1 |
| <b>29</b> | N=C=S               | 0.38       | -6.939 | -3.565 | 3.374 | 376.06                 | 0.43 | 97.1 | -6.688                        | -3.493 | 3.194 | 418.00                 | 0.50 | 97.3 | -6.657                             | -3.493 | 3.164 | 421.38                 | 0.48 | 96.8 |
| <b>37</b> | SiCl <sub>3</sub>   | 0.56       | -7.021 | -3.864 | 3.157 | 406.11                 | 0.35 | 96.2 | -6.677                        | -3.694 | 2.982 | 448.81                 | 0.42 | 98.2 | -6.640                             | -3.685 | 2.955 | 452.02                 | 0.40 | 97.9 |
| <b>45</b> | CN                  | 0.66       | -7.238 | -4.000 | 3.238 | 383.30                 | 0.49 | 97.2 | -6.877                        | -3.848 | 3.030 | 428.75                 | 0.56 | 97.8 | -6.834                             | -3.835 | 2.999 | 431.75                 | 0.54 | 97.4 |
| <b>53</b> | P(O)Cl <sub>2</sub> | 0.9        | -7.102 | -3.946 | 3.157 | 419.31                 | 0.29 | 96.6 | -6.742                        | -3.803 | 2.940 | 465.20                 | 0.35 | 98.3 | -6.702                             | -3.795 | 2.907 | 469.25                 | 0.35 | 98.2 |
| <b>61</b> | C(CN) <sub>3</sub>  | 0.96       | -7.510 | -4.218 | 3.293 | 387.04                 | 0.38 | 94.9 | -7.039                        | -3.945 | 3.093 | 429.71                 | 0.45 | 97.2 | -6.975                             | -3.914 | 3.062 | 433.11                 | 0.43 | 97.2 |
| <b>69</b> | GeF <sub>3</sub>    | 0.97       | -7.374 | -4.272 | 3.102 | 405.41                 | 0.41 | 95.6 | -6.948                        | -4.026 | 2.922 | 451.25                 | 0.47 | 97.1 | -6.898                             | -4.003 | 2.894 | 454.56                 | 0.46 | 96.9 |
| <b>77</b> | SO <sub>2</sub> CN  | 1.26       | -7.456 | -4.299 | 3.157 | 396.29                 | 0.41 | 96.8 | -7.017                        | -4.047 | 2.970 | 437.74                 | 0.49 | 97.9 | -6.963                             | -4.021 | 2.942 | 440.34                 | 0.48 | 97.7 |

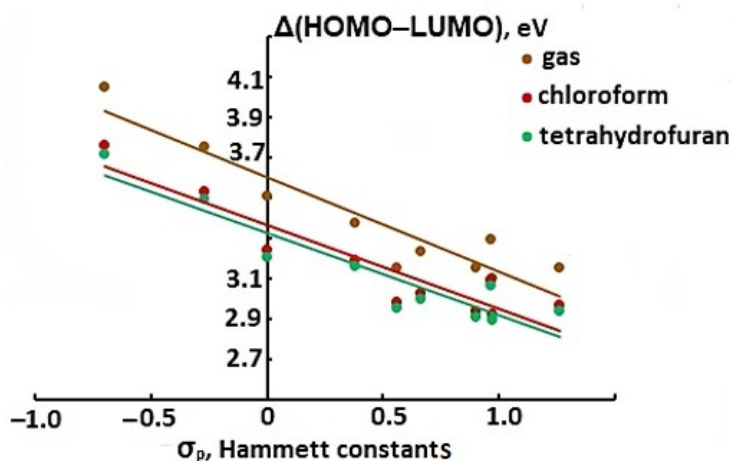

**Fig. S2.** Dependence of the  $\Delta(\text{HOMO-LUMO})$  gap on the  $\sigma_p$  Hammett constants for pyrrolylenones **5**, **13**, **21**, **29**, **37**, **45**, **53**, **61**, **69**, **77** in the gas phase, chloroform and tetrahydrofuran.

$$\text{gas: } \Delta(\text{HOMO-LUMO}) = -0.47 \times \sigma_p + 3.60, r=0.936 \quad (\text{S25})$$

$$\text{chloroform: } \Delta(\text{HOMO-LUMO}) = -0.42 \times \sigma_p + 3.36, r=0.932 \quad (\text{S26})$$

$$\text{tetrahydrofuran: } \Delta(\text{HOMO-LUMO}) = -0.41 \times \sigma_p + 3.33, r=0.931 \quad (\text{S27})$$

Equations to Figure 5:

1.  $R_1 = \text{N}(\text{C}_3\text{H}_7)_2$ ,  $R_2$  varied

$$\lambda_{\text{max}} = 67.55 \times \sigma_p^2 - 0.92 \times \sigma_p + 408.72, r=0.920 \quad (\text{S28})$$

2.  $R_1 = \text{N}(\text{CH}_3)_2$ ,  $R_2$  varied

$$\lambda_{\text{max}} = 65.27 \times \sigma_p^2 + 1.45 \times \sigma_p + 402.42, r=0.918 \quad (\text{S29})$$

3.  $R_1 = \text{NH}_2$ ,  $R_2$  varied

$$\lambda_{\text{max}} = 60.53 \times \sigma_p^2 + 7.37 \times \sigma_p + 381.64, r=0.916 \quad (\text{S30})$$

4.  $R_1 = \text{OH}$ ,  $R_2$  varied

$$\lambda_{\text{max}} = 53.51 \times \sigma_p^2 + 12.93 \times \sigma_p + 383.98, r=0.921 \quad (\text{S31})$$

5.  $R_1 = \text{H}$ ,  $R_2$  varied

$$\lambda_{\text{max}} = 42.05 \times \sigma_p^2 + 21.84 \times \sigma_p + 351.53, r=0.926 \quad (\text{S32})$$

6.  $R_1 = \text{Cl}$ ,  $R_2$  varied

$$\lambda_{\text{max}} = 48.39 \times \sigma_p^2 + 25.58 \times \sigma_p + 354.20, r=0.935 \quad (\text{S33})$$

7.  $R_1 = \text{CHO}$ ,  $R_2$  varied

$$\lambda_{\text{max}} = 32.49 \times \sigma_p^2 + 28.07 \times \sigma_p + 359.05, r=0.930 \quad (\text{S34})$$

8.  $R_1 = \text{NO}_2$ ,  $R_2$  varied

$$\lambda_{\text{max}} = 47.43 \times \sigma_p^2 - 1.45 \times \sigma_p + 358.80, r=0.923 \quad (\text{S35})$$

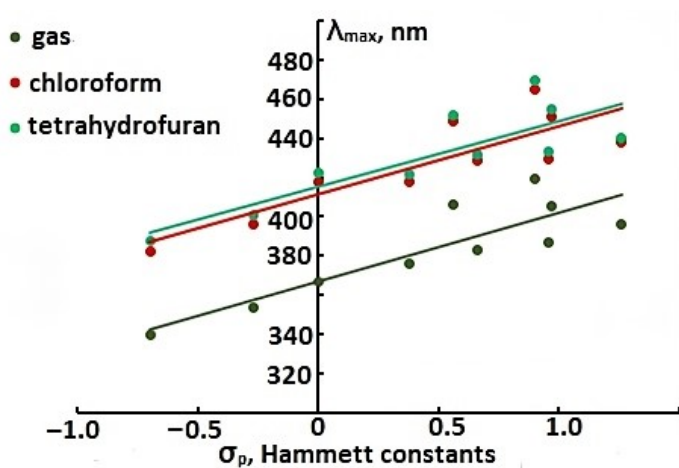

**Fig. S3.** Dependence of the  $\lambda_{\max}$  wavelength on the  $\sigma_p$  Hammett constants for pyrrolylenones **5, 13, 21, 29, 37, 45, 53, 61, 69, 77** in the gas phase, chloroform and tetrahydrofuran.

$$\text{gas: } \lambda_{\max} = 35.13 \times \sigma_p + 366.72, r=0.874 \quad (\text{S36})$$

$$\text{chloroform: } \lambda_{\max} = 34.67 \times \sigma_p + 411.21, r=0.853 \quad (\text{S37})$$

$$\text{tetrahydrofuran: } \lambda_{\max} = 33.43 \times \sigma_p + 415.57, r=0.841 \quad (\text{S38})$$

Equations to Figure 7:

Part a)

1.  $R_1 = \text{N}(\text{CH}_3)_2$ ,  $R_2$  varied

$$\text{HOMO}(\text{energy}) = -0.03 \times [-E_\pi(\text{PPE})]^2 + 0.49 \times [-E_\pi(\text{PPE})] - 7.88, r=0.979 \quad (\text{S39})$$

2.  $R_1 = \text{NH}_2$ ,  $R_2$  varied

$$\text{HOMO}(\text{energy}) = -0.04 \times [-E_\pi(\text{PPE})]^2 + 0.63 \times [-E_\pi(\text{PPE})] - 8.44, r=0.971 \quad (\text{S40})$$

3.  $R_1 = \text{OH}$ ,  $R_2$  varied

$$\text{HOMO}(\text{energy}) = -0.06 \times [-E_\pi(\text{PPE})]^2 + 0.81 \times [-E_\pi(\text{PPE})] - 8.63, r=0.972 \quad (\text{S41})$$

Part b)

1.  $R_1 = \text{N}(\text{CH}_3)_2$ ,  $R_2$  varied

$$\text{LUMO}(\text{energy}) = -0.03 \times [-E_\pi(\text{PPE})]^2 + 0.49 \times [-E_\pi(\text{PPE})] - 4.45, r=0.978 \quad (\text{S42})$$

2.  $R_1 = \text{NH}_2$ ,  $R_2$  varied

$$\text{LUMO}(\text{energy}) = -0.04 \times [-E_\pi(\text{PPE})]^2 + 0.60 \times [-E_\pi(\text{PPE})] - 4.65, r=0.970 \quad (\text{S43})$$

3.  $R_1 = \text{OH}$ ,  $R_2$  varied

$$\text{LUMO}(\text{energy}) = -0.07 \times [-E_\pi(\text{PPE})]^2 + 0.82 \times [-E_\pi(\text{PPE})] - 4.91, r=0.973 \quad (\text{S44})$$

Part c)

1.  $R_1 = \text{N}(\text{CH}_3)_2$ ,  $R_2$  varied

$$\Delta(\text{HOMO-LUMO}) = -0.09 \times [-E_\pi(\text{PPE})] + 3.98, r=0.941 \quad (\text{S45})$$

2.  $R_1 = \text{NH}_2$ ,  $R_2$  varied

$$\Delta(\text{HOMO-LUMO}) = -0.11 \times [-E_\pi(\text{PPE})] + 4.22, r=0.948 \quad (\text{S46})$$

3.  $R_1 = \text{OH}$ ,  $R_2$  varied

$$\Delta(\text{HOMO-LUMO}) = -0.14 \times [-E_\pi(\text{PPE})] + 4.35, r=0.932 \quad (\text{S47})$$

Equations to Figure 9:

1.  $R_1=N(CH_3)_2$ ,  $R_2$  varied

$$\lambda_{\max} = 1.60 \times [-E_{\pi}(PPE)]^2 - 30.36 \times [-E_{\pi}(PPE)] + 549.75, \quad r=0.961 \quad (S48)$$

2.  $R_1=NH_2$ ,  $R_2$  varied

$$\lambda_{\max} = 2.07 \times [-E_{\pi}(PPE)]^2 - 32.07 \times [-E_{\pi}(PPE)] + 506.21, \quad r=0.952 \quad (S49)$$

3.  $R_1=OH$ ,  $R_2$  varied

$$\lambda_{\max} = 2.97 \times [-E_{\pi}(PPE)]^2 - 33.87 \times [-E_{\pi}(PPE)] + 456.73, \quad r=0.946 \quad (S50)$$

a)  $R_1=N(C_3H_7)_2$

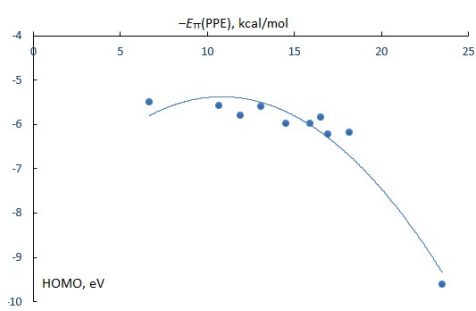

b)  $R_1=H$

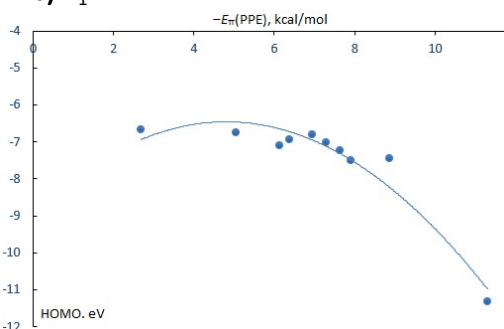

c)  $R_1=Cl$

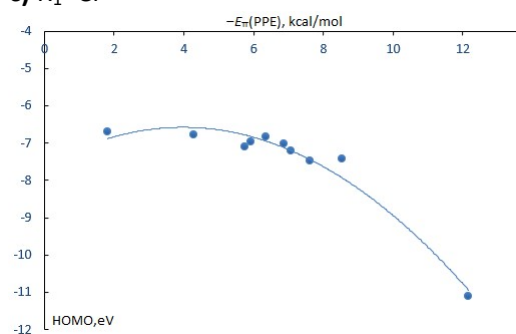

d)  $R_1=CHO$

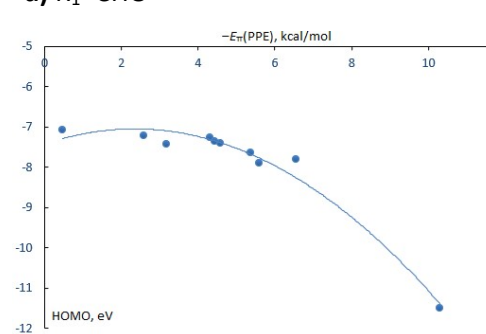

e)  $R_1=NO_2$

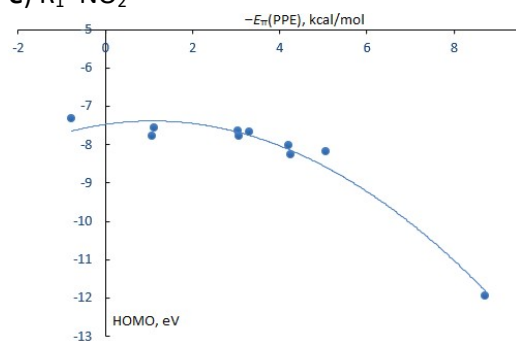

**Fig. S4** Dependence of the HOMO energy on the  $-E_{\pi}(PPE)$  push-pull effect energy for pyrrolylenones **1, 9, 17, 25, 33, 41, 49, 57, 65, 73, 81**,  $R_1=N(C_3H_7)_2$  (a); **5, 13, 21, 29, 37, 45, 53, 61, 69, 77, 85**,  $R_1=H$  (b); **6, 14, 22, 30, 38, 46, 54, 62, 70, 78, 86**,  $R_1=Cl$  (c); **7, 15, 23, 31, 39, 47, 55, 63, 71, 79, 87**,  $R_1=CHO$  (d); **8, 16, 24, 32, 40, 48, 56, 64, 72, 80, 88**,  $R_1=NO_2$  (e).

Equations to Figure S4:

a)  $R_1=N(C_3H_7)_2$ : HOMO (energy) =  $-0.02 \times [-E_{\pi}(PPE)]^2 + 0.54 \times [-E_{\pi}(PPE)] - 8.26$ ;  $r=0.968$  (S51)

b)  $R_1=H$ : HOMO (energy) =  $-0.11 \times [-E_{\pi}(PPE)]^2 + 1.03 \times [-E_{\pi}(PPE)] - 8.93$ ;  $r=0.965$  (S52)

c)  $R_1=Cl$ : HOMO (energy) =  $-0.07 \times [-E_{\pi}(PPE)]^2 + 0.52 \times [-E_{\pi}(PPE)] - 7.60$ ;  $r=0.984$  (S53)

d)  $R_1=CHO$ : HOMO (energy) =  $-0.07 \times [-E_{\pi}(PPE)]^2 + 0.32 \times [-E_{\pi}(PPE)] - 7.43$ ;  $r=0.986$  (S54)

e)  $R_1=NO_2$ : HOMO (energy) =  $-0.08 \times [-E_{\pi}(PPE)]^2 + 0.16 \times [-E_{\pi}(PPE)] - 7.47$ ;  $r=0.984$  (S55)



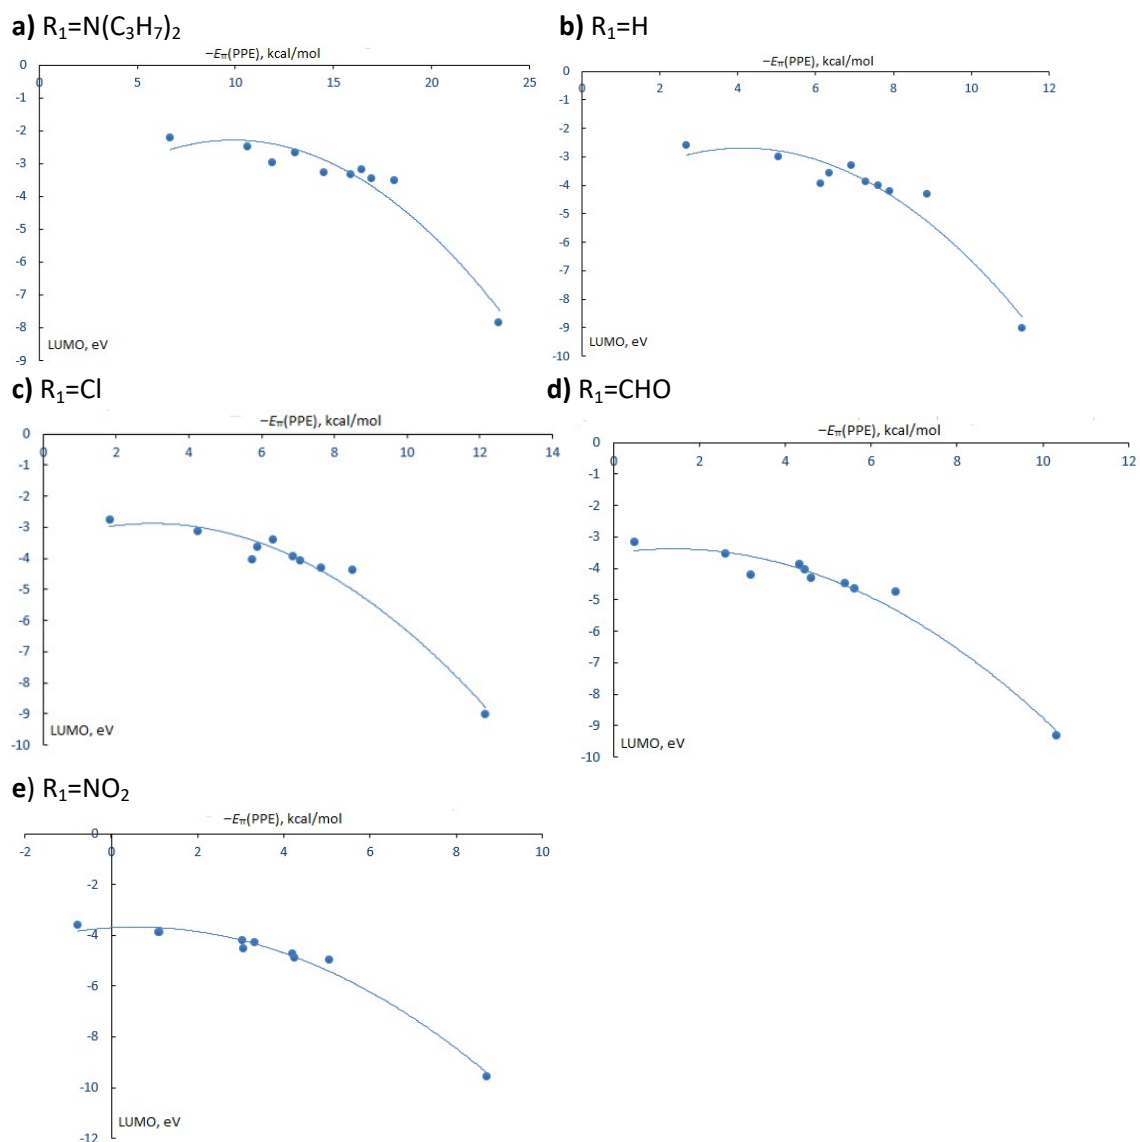

**Fig. S5** Dependence of the LUMO energy on the  $-E_{\pi}(\text{PPE})$  push-pull effect energy for pyrrolylenones **1, 9, 17, 25, 33, 41, 49, 57, 65, 73, 81**,  $R_1 = \text{N}(\text{C}_3\text{H}_7)_2$  (a); **5, 13, 21, 29, 37, 45, 53, 61, 69, 77, 85**,  $R_1 = \text{H}$  (b); **6, 14, 22, 30, 38, 46, 54, 62, 70, 78, 86**,  $R_1 = \text{Cl}$  (c); **7, 15, 23, 31, 39, 47, 55, 63, 71, 79, 87**,  $R_1 = \text{CHO}$  (d); **8, 16, 24, 32, 40, 48, 56, 64, 72, 80, 88**,  $R_1 = \text{NO}_2$  (e).

Equations to Figure S5:

**a)  $R_1 = \text{N}(\text{C}_3\text{H}_7)_2$** :  $\text{LUMO (energy)} = -0.03 \times [-E_{\pi}(\text{PPE})]^2 + 0.56 \times [-E_{\pi}(\text{PPE})] - 5.04$ ;  $r=0.968$  (S56)

**b)  $R_1 = \text{H}$** :  $\text{LUMO (energy)} = -0.12 \times [-E_{\pi}(\text{PPE})]^2 + 0.95 \times [-E_{\pi}(\text{PPE})] - 4.66$ ;  $r=0.962$  (S57)

**c)  $R_1 = \text{Cl}$** :  $\text{LUMO (energy)} = -0.07 \times [-E_{\pi}(\text{PPE})]^2 + 0.42 \times [-E_{\pi}(\text{PPE})] - 3.51$ ;  $r=0.980$  (S58)

**d)  $R_1 = \text{CHO}$** :  $\text{LUMO (energy)} = -0.07 \times [-E_{\pi}(\text{PPE})]^2 + 0.20 \times [-E_{\pi}(\text{PPE})] - 3.52$ ;  $r=0.983$  (S59)

**e)  $R_1 = \text{NO}_2$** :  $\text{LUMO (energy)} = -0.09 \times [-E_{\pi}(\text{PPE})]^2 + 0.10 \times [-E_{\pi}(\text{PPE})] - 3.70$ ;  $r=0.992$  (S60)

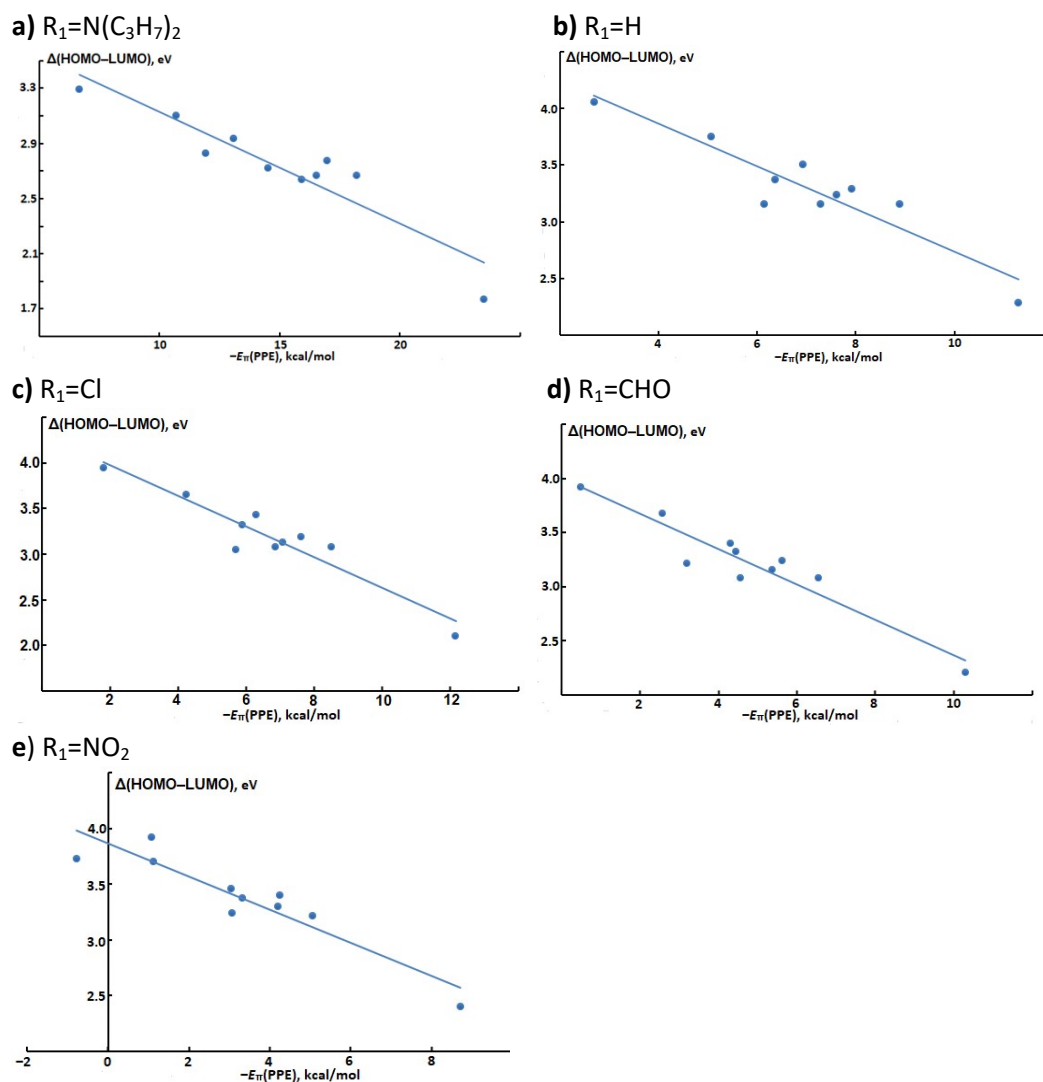

**Fig. S6** Dependence of the  $\Delta(\text{HOMO-LUMO})$  gap on the  $-E_{\pi}(\text{PPE})$  push-pull effect energy for pyrrolylenones **1, 9, 17, 25, 33, 41, 49, 57, 65, 73, 81**,  $R_1=\text{N}(\text{C}_3\text{H}_7)_2$  (a); **5, 13, 21, 29, 37, 45, 53, 61, 69, 77, 85**,  $R_1=\text{H}$  (b); **6, 14, 22, 30, 38, 46, 54, 62, 70, 78, 86**,  $R_1=\text{Cl}$  (c); **7, 15, 23, 31, 39, 47, 55, 63, 71, 79, 87**,  $R_1=\text{CHO}$  (d); **8, 16, 24, 32, 40, 48, 56, 64, 72, 80, 88**,  $R_1=\text{NO}_2$  (e).

Equations to Figure S6:

**a)**  $R_1=\text{N}(\text{C}_3\text{H}_7)_2$ :  $\Delta(\text{HOMO-LUMO}) = -0.08 \times [-E_{\pi}(\text{PPE})] + 3.94$ ;  $r=0.929$  (S61)

**b)**  $R_1=\text{H}$ :  $\Delta(\text{HOMO-LUMO}) = -0.19 \times [-E_{\pi}(\text{PPE})] + 4.62$ ;  $r=0.927$  (S62)

**c)**  $R_1=\text{Cl}$ :  $\Delta(\text{HOMO-LUMO}) = -0.17 \times [-E_{\pi}(\text{PPE})] + 4.31$ ;  $r=0.945$  (S63)

**d)**  $R_1=\text{CHO}$ :  $\Delta(\text{HOMO-LUMO}) = -0.16 \times [-E_{\pi}(\text{PPE})] + 4.00$ ;  $r=0.948$  (S64)

**e)**  $R_1=\text{NO}_2$ :  $\Delta(\text{HOMO-LUMO}) = -0.15 \times [-E_{\pi}(\text{PPE})] + 3.86$ ;  $r=0.929$  (S65)

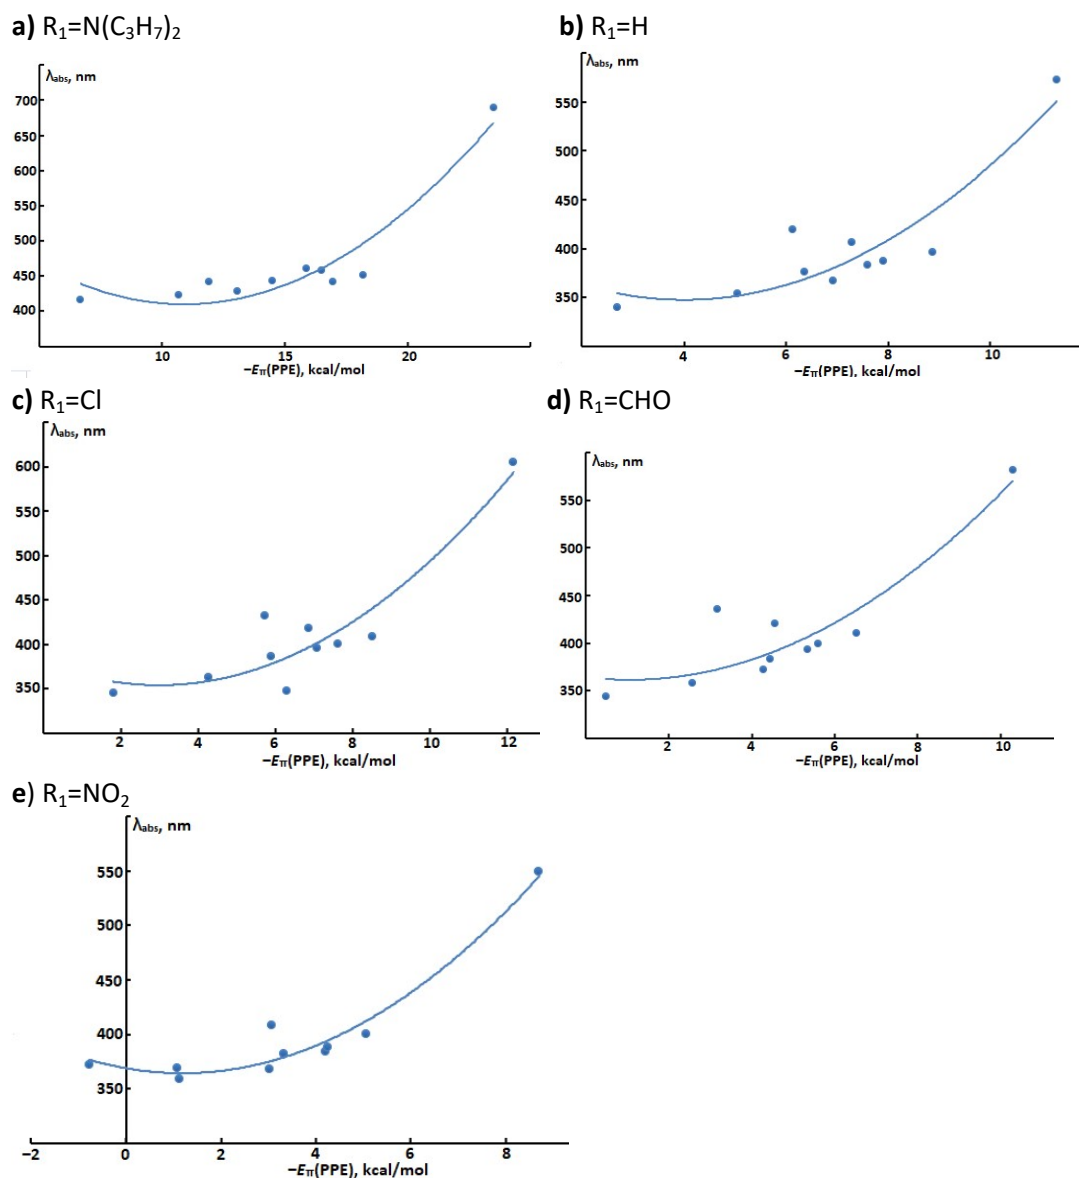

**Fig. S7** Dependence of the  $\lambda_{\max}$  absorption wavelength on the  $-E_{\pi}(\text{PPE})$  push-pull effect energy for pyrrolylenones **1, 9, 17, 25, 33, 41, 49, 57, 65, 73, 81**,  $R_1 = \text{N}(\text{C}_3\text{H}_7)_2$  (a); **5, 13, 21, 29, 37, 45, 53, 61, 69, 77, 85**,  $R_1 = \text{H}$  (b); **6, 14, 22, 30, 38, 46, 54, 62, 70, 78, 86**,  $R_1 = \text{Cl}$  (c); **7, 15, 23, 31, 39, 47, 55, 63, 71, 79, 87**,  $R_1 = \text{CHO}$  (d); **8, 16, 24, 32, 40, 48, 56, 64, 72, 80, 88**,  $R_1 = \text{NO}_2$  (e)..

Equations to Figure S7:

**a)  $R_1 = \text{N}(\text{C}_3\text{H}_7)_2$ :  $\lambda_{\max} = 1.62 \times [-E_{\pi}(\text{PPE})]^2 - 35.34 \times [-E_{\pi}(\text{PPE})] + 602.63$ ;  $r=0.953$  (S66)**

**b)  $R_1 = \text{H}$ :  $\lambda_{\max} = 3.84 \times [-E_{\pi}(\text{PPE})]^2 - 30.76 \times [-E_{\pi}(\text{PPE})] + 409.15$ ;  $r=0.911$  (S67)**

**c)  $R_1 = \text{Cl}$ :  $\lambda_{\max} = 2.85 \times [-E_{\pi}(\text{PPE})]^2 - 17.04 \times [-E_{\pi}(\text{PPE})] + 379.43$ ;  $r=0.929$  (S68)**

**d)  $R_1 = \text{CHO}$ :  $\lambda_{\max} = 2.45 \times [-E_{\pi}(\text{PPE})]^2 - 5.19 \times [-E_{\pi}(\text{PPE})] + 364.10$ ;  $r=0.914$  (S69)**

**e)  $R_1 = \text{NO}_2$ :  $\lambda_{\max} = 3.20 \times [-E_{\pi}(\text{PPE})]^2 - 7.62 \times [-E_{\pi}(\text{PPE})] + 368.75$ ;  $r=0.973$  (S70)**

**The equations used for calculation of photovoltaic performance:**

1) Light-harvesting efficiency (*LHE*):

$$LHE = 1 - 10^{-f} \quad (S71) \quad [24-26, 32]$$

where  $f$  is the oscillator strength

2) Open-circuit voltage ( $V_{OC}$ ):

$$V_{OC} = E_{LUMO} - E_{CB}(TiO_2) \quad (S72) \quad [24-26, 32]$$

where  $E_{CB}(TiO_2)$  – conducting band of  $TiO_2$  (–4.0 eV)

3) Full factor of cell (*FF*):

$$FF = \{(eV_{OC}/K_B T) - \ln[(eV_{OC}/K_B T) + 0.72]\} / [(eV_{OC}/K_B T) + 1] \quad (S73) \quad [30; Ref.S1]$$

where  $e$  is an elementary charge (1),  $K_B$  is Boltzmann constant,  $T$  is temperature at 298K,  $(eV_{OC}/K_B T)$  is the normalized voltage

Ref. S1 L. Zhag, W. Shem, R. He, X. Liu, X. Tang, Y. Yang and M. Li, *Org. Electron.*, 2016, **32**, 134 – 144.

4) The free energy change during the electron-injection process ( $\Delta G_{inject}$ ).

$$\Delta G_{inject} = E^*_{dye} - E_{CB}(TiO_2) \quad (S74) \quad [24 - 26, 31]$$

where  $E^*_{dye}$  is the excited state oxidation potential energy,  $E_{CB}(TiO_2)$  is the reduction potential of the conduction band of the  $TiO_2$  semiconductor;  $E^*_{dye} = E_{dye} - E_{00}$ , where  $E_{dye}$  is oxidation potential energy of the dye in the ground state and  $E_{00}$  is the vertical excitation energy corresponding with  $\lambda_{max}$ .

Driving force of regeneration ( $\Delta G_{regen}$ ) between the oxidized dye and electrolyte.

$$\Delta G_{regen} = E_{redox} - E_{dye} \quad (S75) \quad [24 - 26, 31]$$

where  $E_{redox}$  is the Fermi levels of the iodide/triiodide electrolyte (–4.8 eV),

**Table S3.** The calculated values of light-harvesting efficiency (*LHE*), open-circuit voltage ( $V_{OC}$ , eV), full factor of cell (*FF*), free energy change for the electron-injection process ( $\Delta G_{inject}$ , eV) and driving force of sensitizer regeneration ( $\Delta G_{regen}$ , eV).

| No       | R <sub>1</sub>                                 | R <sub>2</sub>      | R <sub>3</sub>  | <i>LHE</i> | $V_{OC}$ | <i>FF</i> | $\Delta G_{inject}$ | $\Delta G_{regen}$ |
|----------|------------------------------------------------|---------------------|-----------------|------------|----------|-----------|---------------------|--------------------|
| Series ① |                                                |                     |                 |            |          |           |                     |                    |
| 1        | N(C <sub>3</sub> H <sub>7</sub> ) <sub>2</sub> | NHCH <sub>3</sub>   | NO <sub>2</sub> | 0.532      | 1.796    | 0.926     | -1.481              | 0.697              |
| 2        | N(CH <sub>3</sub> ) <sub>2</sub>               |                     |                 | 0.521      | 1.714    | 0.923     | -1.413              | 0.833              |
| 3        | NH <sub>2</sub>                                |                     |                 | 0.475      | 1.605    | 0.919     | -1.250              | 1.214              |
| 4        | OH                                             |                     |                 | 0.499      | 1.388    | 0.909     | -1.174              | 1.486              |
| 5        | H                                              |                     |                 | 0.521      | 1.388    | 0.909     | -0.987              | 1.867              |
| 6        | Cl                                             |                     |                 | 0.553      | 1.252    | 0.902     | -0.898              | 1.894              |
| 7        | CHO                                            |                     |                 | 0.499      | 0.843    | 0.867     | -0.533              | 2.275              |
| 8        | NO <sub>2</sub>                                |                     |                 | 0.308      | 0.408    | 0.775     | -0.011              | 2.52               |
| Series ② |                                                |                     |                 |            |          |           |                     |                    |
| 9        | N(C <sub>3</sub> H <sub>7</sub> ) <sub>2</sub> | OCH <sub>3</sub>    | NO <sub>2</sub> | 0.628      | 1.524    | 0.916     | -1.350              | 0.778              |
| 10       | N(CH <sub>3</sub> ) <sub>2</sub>               |                     |                 | 0.611      | 1.442    | 0.912     | -1.233              | 0.942              |
| 11       | NH <sub>2</sub>                                |                     |                 | 0.593      | 1.306    | 0.905     | -1.111              | 1.241              |
| 12       | OH                                             |                     |                 | 0.499      | 1.17     | 0.896     | -0.966              | 1.568              |
| 13       | H                                              |                     |                 | 0.593      | 1.007    | 0.884     | -0.758              | 1.948              |
| 14       | Cl                                             |                     |                 | 0.620      | 0.871    | 0.870     | -0.647              | 1.976              |
| 15       | CHO                                            |                     |                 | 0.698      | 0.462    | 0.793     | -0.260              | 2.411              |
| 16       | NO <sub>2</sub>                                |                     |                 | 0.684      | 0.136    | 0.557     | 0.107               | 2.765              |
| Series ③ |                                                |                     |                 |            |          |           |                     |                    |
| 17       | N(C <sub>3</sub> H <sub>7</sub> ) <sub>2</sub> | H                   | NO <sub>2</sub> | 0.718      | 1.333    | 0.906     | -1.290              | 0.806              |
| 18       | N(CH <sub>3</sub> ) <sub>2</sub>               |                     |                 | 0.698      | 1.224    | 0.900     | -1.195              | 0.942              |
| 19       | NH <sub>2</sub>                                |                     |                 | 0.669      | 1.088    | 0.890     | -1.043              | 1.241              |
| 20       | OH                                             |                     |                 | 0.661      | 0.898    | 0.873     | -0.840              | 1.595              |
| 21       | H                                              |                     |                 | 0.653      | 0.707    | 0.848     | -0.580              | 2.003              |
| 22       | Cl                                             |                     |                 | 0.691      | 0.599    | 0.828     | -0.735              | 2.03               |
| 23       | CHO                                            |                     |                 | 0.760      | 0.136    | 0.557     | -0.071              | 2.465              |
| 24       | NO <sub>2</sub>                                |                     |                 | 0.781      | -0.191   | -         | 0.276               | 2.846              |
| Series ④ |                                                |                     |                 |            |          |           |                     |                    |
| 25       | N(C <sub>3</sub> H <sub>7</sub> ) <sub>2</sub> | N=C=S               | NO <sub>2</sub> | 0.771      | 1.034    | 0.886     | -1.010              | 0.996              |
| 26       | N(CH <sub>3</sub> ) <sub>2</sub>               |                     |                 | 0.743      | 0.925    | 0.876     | -0.911              | 1.132              |
| 27       | NH <sub>2</sub>                                |                     |                 | 0.684      | 0.707    | 0.848     | -0.681              | 1.486              |
| 28       | OH                                             |                     |                 | 0.684      | 0.626    | 0.834     | -0.598              | 1.758              |
| 29       | H                                              |                     |                 | 0.628      | 0.435    | 0.785     | -0.358              | 2.139              |
| 30       | Cl                                             |                     |                 | 0.684      | 0.354    | 0.752     | -0.243              | 2.166              |
| 31       | CHO                                            |                     |                 | 0.684      | -0.027   | -         | 0.109               | 2.547              |
| 32       | NO <sub>2</sub>                                |                     |                 | 0.487      | -0.299   | -         | 0.430               | 2.874              |
| Series ⑤ |                                                |                     |                 |            |          |           |                     |                    |
| 33       | N(C <sub>3</sub> H <sub>7</sub> ) <sub>2</sub> | SiCl <sub>3</sub>   | NO <sub>2</sub> | 0.705      | 0.816    | 0.863     | -0.855              | 1.05               |
| 34       | N(CH <sub>3</sub> ) <sub>2</sub>               |                     |                 | 0.684      | 0.707    | 0.848     | -0.757              | 1.187              |
| 35       | NH <sub>2</sub>                                |                     |                 | 0.645      | 0.571    | 0.822     | -0.603              | 1.459              |
| 36       | OH                                             |                     |                 | 0.611      | 0.435    | 0.785     | -0.413              | 1.758              |
| 37       | H                                              |                     |                 | 0.553      | 0.136    | 0.557     | -0.032              | 2.221              |
| 38       | Cl                                             |                     |                 | 0.543      | 0.054    | 0.344     | 0.056               | 2.221              |
| 39       | CHO                                            |                     |                 | 0.553      | -0.327   | -         | 0.451               | 2.602              |
| 40       | NO <sub>2</sub>                                |                     |                 | 0.583      | -0.544   | -         | 0.742               | 2.983              |
| Series ⑥ |                                                |                     |                 |            |          |           |                     |                    |
| 41       | N(C <sub>3</sub> H <sub>7</sub> ) <sub>2</sub> | CN                  | NO <sub>2</sub> | 0.781      | 0.735    | 0.852     | -0.808              | 1.187              |
| 42       | N(CH <sub>3</sub> ) <sub>2</sub>               |                     |                 | 0.760      | 0.626    | 0.834     | -0.706              | 1.323              |
| 43       | NH <sub>2</sub>                                |                     |                 | 0.725      | 0.435    | 0.785     | -0.549              | 1.622              |
| 44       | OH                                             |                     |                 | 0.712      | 0.245    | 0.685     | -0.307              | 2.003              |
| 45       | H                                              |                     |                 | 0.676      | 0        | 0.329     | 0.003               | 2.438              |
| 46       | Cl                                             |                     |                 | 0.712      | -0.082   | -         | 0.076               | 2.411              |
| 47       | CHO                                            |                     |                 | 0.737      | -0.49    | -         | 0.493               | 2.846              |
| 48       | NO <sub>2</sub>                                |                     |                 | 0.737      | -0.735   | -         | 0.796               | 3.227              |
| Series ⑦ |                                                |                     |                 |            |          |           |                     |                    |
| 49       | N(C <sub>3</sub> H <sub>7</sub> ) <sub>2</sub> | P(O)Cl <sub>2</sub> | NO <sub>2</sub> | 0.705      | 0.653    | 0.839     | -0.704              | 1.187              |
| 50       | N(CH <sub>3</sub> ) <sub>2</sub>               |                     |                 | 0.676      | 0.544    | 0.816     | -0.591              | 1.323              |
| 51       | NH <sub>2</sub>                                |                     |                 | 0.628      | 0.354    | 0.752     | -0.398              | 1.649              |
| 52       | OH                                             |                     |                 | 0.543      | 0.218    | 0.661     | -0.150              | 1.976              |
| 53       | H                                              |                     |                 | 0.487      | 0.054    | 0.344     | 0.145               | 2.302              |
| 54       | Cl                                             |                     |                 | 0.521      | -0.055   | -         | 0.233               | 2.302              |
| 55       | CHO                                            |                     |                 | 0.397      | -0.218   | -         | 0.578               | 2.629              |
| 56       | NO <sub>2</sub>                                |                     |                 | 0.149      | 0.136    | 0.557     | 0.423               | 2.983              |
| Series ⑧ |                                                |                     |                 |            |          |           |                     |                    |
| 57       | N(C <sub>3</sub> H <sub>7</sub> ) <sub>2</sub> | C(CN) <sub>3</sub>  | NO <sub>2</sub> | 0.725      | 0.544    | 0.816     | -0.576              | 1.431              |
| 58       | N(CH <sub>3</sub> ) <sub>2</sub>               |                     |                 | 0.712      | 0.435    | 0.785     | -0.456              | 1.595              |

|                |                                                |                    |                                                |       |        |       |        |       |
|----------------|------------------------------------------------|--------------------|------------------------------------------------|-------|--------|-------|--------|-------|
| 59             | NH <sub>2</sub>                                |                    |                                                | 0.661 | 0.245  | 0.685 | -0.285 | 1.894 |
| 60             | OH                                             |                    |                                                | 0.628 | -0.027 | -     | -0.005 | 2.302 |
| 61             | H                                              |                    |                                                | 0.583 | -0.218 | -     | 0.306  | 2.71  |
| 62             | Cl                                             |                    |                                                | 0.628 | -0.299 | -     | 0.383  | 2.683 |
| 63             | CHO                                            |                    |                                                | 0.611 | -0.653 | -     | 0.783  | 3.091 |
| 64             | NO <sub>2</sub>                                |                    |                                                | 0.620 | -0.871 | -     | 1.080  | 3.472 |
| Series ⑨       |                                                |                    |                                                |       |        |       |        |       |
| 65             | N(C <sub>3</sub> H <sub>7</sub> ) <sub>2</sub> | GeF <sub>3</sub>   | NO <sub>2</sub>                                | 0.718 | 0.408  | 0.775 | -0.418 | 1.431 |
| 66             | N(CH <sub>3</sub> ) <sub>2</sub>               |                    |                                                | 0.698 | 0.326  | 0.738 | -0.322 | 1.568 |
| 67             | NH <sub>2</sub>                                |                    |                                                | 0.661 | 0.163  | 0.598 | -0.192 | 1.812 |
| 68             | OH                                             |                    |                                                | 0.637 | -0.055 | -     | 0.060  | 2.193 |
| 69             | H                                              |                    |                                                | 0.611 | -0.272 | -     | 0.315  | 2.574 |
| 70             | Cl                                             |                    |                                                | 0.661 | -0.354 | -     | 0.400  | 2.574 |
| 71             | CHO                                            |                    |                                                | 0.698 | -0.708 | -     | 0.741  | 2.955 |
| 72             | NO <sub>2</sub>                                |                    |                                                | 0.705 | -0.98  | -     | 1.021  | 3.309 |
| Series ⑩       |                                                |                    |                                                |       |        |       |        |       |
| 73             | N(C <sub>3</sub> H <sub>7</sub> ) <sub>2</sub> | SO <sub>2</sub> CN | NO <sub>2</sub>                                | 0.755 | 0.49   | 0.802 | -0.574 | 1.377 |
| 74             | N(CH <sub>3</sub> ) <sub>2</sub>               |                    |                                                | 0.737 | 0.354  | 0.752 | -0.455 | 1.54  |
| 75             | NH <sub>2</sub>                                |                    |                                                | 0.676 | 0.163  | 0.598 | -0.283 | 1.84  |
| 76             | OH                                             |                    |                                                | 0.676 | -0.055 | -     | 0.004  | 2.248 |
| 77             | H                                              |                    |                                                | 0.611 | -0.299 | -     | 0.327  | 2.656 |
| 78             | Cl                                             |                    |                                                | 0.661 | -0.354 | -     | 0.397  | 2.629 |
| 79             | CHO                                            |                    |                                                | 0.653 | -0.735 | -     | 0.785  | 3.01  |
| 80             | NO <sub>2</sub>                                |                    |                                                | 0.653 | -0.98  | -     | 1.091  | 3.391 |
| Series ⑪       |                                                |                    |                                                |       |        |       |        |       |
| 81             | N(C <sub>3</sub> H <sub>7</sub> ) <sub>2</sub> | N≡N <sup>⊕</sup>   | NO <sub>2</sub>                                | 0.324 | -3.837 | -     | 3.806  | 4.806 |
| 82             | N(CH <sub>3</sub> ) <sub>2</sub>               |                    |                                                | 0.383 | -4.027 | -     | 3.996  | 5.023 |
| 83             | NH <sub>2</sub>                                |                    |                                                | 0.339 | -4.354 | -     | 4.356  | 5.459 |
| 84             | OH                                             |                    |                                                | 0.324 | -4.735 | -     | 4.787  | 6.003 |
| 85             | H                                              |                    |                                                | 0.292 | -5.034 | -     | 5.154  | 6.52  |
| 86             | Cl                                             |                    |                                                | 0.354 | -5.007 | -     | 5.054  | 6.302 |
| 87             | CHO                                            |                    |                                                | 0.354 | -5.306 | -     | 5.377  | 6.711 |
| 88             | NO <sub>2</sub>                                |                    |                                                | 0.354 | -5.551 | -     | 5.690  | 7.146 |
| Series ⑫       |                                                |                    |                                                |       |        |       |        |       |
| 89             | H                                              | H                  | N(C <sub>3</sub> H <sub>7</sub> ) <sub>2</sub> | 0.842 | 2.422  | 0.942 | -2.264 | 0.996 |
| 90             |                                                |                    | N(CH <sub>3</sub> ) <sub>2</sub>               | 0.766 | 2.367  | 0.941 | -2.193 | 1.05  |
| 91             |                                                |                    | NH <sub>2</sub>                                | 0.791 | 2.286  | 0.939 | -2.184 | 1.159 |
| 92             |                                                |                    | NHNH <sub>2</sub>                              | 0.822 | 2.231  | 0.938 | -2.134 | 1.187 |
| 93             |                                                |                    | OH                                             | 0.791 | 1.986  | 0.932 | -1.927 | 1.35  |
| 94             |                                                |                    | OCH <sub>3</sub>                               | 0.781 | 1.932  | 0.930 | -1.851 | 1.377 |
| 95             |                                                |                    | CH <sub>3</sub>                                | 0.791 | 1.959  | 0.931 | -1.890 | 1.241 |
| 96             |                                                |                    | CH <sub>2</sub> C <sub>6</sub> H <sub>5</sub>  | 0.791 | 1.905  | 0.929 | -1.795 | 1.214 |
| 97             |                                                |                    | H                                              | 0.776 | 1.66   | 0.921 | -1.664 | 1.377 |
| 98             |                                                |                    | F                                              | 0.786 | 1.551  | 0.917 | -1.546 | 1.676 |
| 99             |                                                |                    | SH                                             | 0.834 | 1.66   | 0.921 | -1.581 | 1.486 |
| 100            |                                                |                    | Cl                                             | 0.822 | 1.36   | 0.908 | -1.332 | 1.731 |
| 101            |                                                |                    | CONH <sub>2</sub>                              | 0.771 | 1.306  | 0.905 | -1.276 | 1.431 |
| 102            |                                                |                    | CHO                                            | 0.593 | 0.952  | 0.879 | -0.785 | 1.568 |
| 103            |                                                |                    | CCl <sub>3</sub>                               | 0.786 | 1.306  | 0.905 | -1.223 | 1.622 |
| 104            |                                                |                    | CF <sub>3</sub>                                | 0.796 | 1.197  | 0.898 | -1.208 | 1.731 |
| 105            |                                                |                    | SiCl <sub>3</sub>                              | 0.826 | 0.98   | 0.881 | -0.958 | 1.758 |
| 106            |                                                |                    | CN                                             | 0.796 | 0.843  | 0.867 | -0.842 | 1.867 |
| 107            |                                                |                    | P(O)Cl <sub>2</sub>                            | 0.849 | 0.735  | 0.852 | -0.731 | 1.976 |
| 5 <sup>p</sup> |                                                |                    | NO <sub>2</sub>                                | 0.521 | 1.388  | 0.909 | -0.987 | 1.867 |
| 108            |                                                |                    | C(CN) <sub>3</sub>                             | 0.838 | 0.68   | 0.844 | -0.691 | 2.166 |
| 109            |                                                |                    | GeF <sub>3</sub>                               | 0.830 | 0.626  | 0.834 | -0.641 | 2.139 |
| 110            |                                                |                    | SO <sub>2</sub> Cl                             | 0.781 | 0.462  | 0.793 | -0.450 | 2.302 |
| 111            |                                                |                    | SO <sub>2</sub> CN                             | 0.852 | 0.462  | 0.793 | -0.494 | 2.329 |

Equations to Figure 13:

**a)**

1.  $R_1=N(C_3H_7)_2$ ,  $R_2$  varied

$$LHE = -0.87 \times [\Delta(\text{HOMO-LUMO})]^2 + 4.87 \times \Delta(\text{HOMO-LUMO}) - 6.04, \quad r=0.942 \quad (\text{S76})$$

2.  $R_1=N(CH_3)_2$ ,  $R_2$  varied

$$LHE = -0.81 \times [\Delta(\text{HOMO-LUMO})]^2 + 4.61 \times \Delta(\text{HOMO-LUMO}) - 5.81, \quad r=0.944 \quad (\text{S77})$$

3.  $R_1=NH_2$ ,  $R_2$  varied

$$LHE = -0.49 \times [\Delta(\text{HOMO-LUMO})]^2 + 2.89 \times \Delta(\text{HOMO-LUMO}) - 3.61, \quad r=0.933 \quad (\text{S78})$$

**b)**

1.  $R_1=N(C_3H_7)_2$ ,  $R_2$  varied

$$V_{OC} = 2.02 \times \Delta(\text{HOMO-LUMO}) - 4.79, \quad r=0.945 \quad (\text{S79})$$

2.  $R_1=N(CH_3)_2$ ,  $R_2$  varied

$$V_{OC} = 1.94 \times \Delta(\text{HOMO-LUMO}) - 4.74, \quad r=0.935 \quad (\text{S80})$$

3.  $R_1=NH_2$ ,  $R_2$  varied

$$V_{OC} = 1.72 \times \Delta(\text{HOMO-LUMO}) - 4.52, \quad r=0.947 \quad (\text{S81})$$

**c)**

1.  $R_1=N(C_3H_7)_2$ ,  $R_2$  varied

$$FF = -0.30 \times [\Delta(\text{HOMO-LUMO})]^2 + 1.94 \times \Delta(\text{HOMO-LUMO}) - 2.23, \quad r=0.854 \quad (\text{S82})$$

2.  $R_1=N(CH_3)_2$ ,  $R_2$  varied

$$FF = -0.30 \times [\Delta(\text{HOMO-LUMO})]^2 + 2.05 \times \Delta(\text{HOMO-LUMO}) - 2.51, \quad r=0.805 \quad (\text{S83})$$

3.  $R_1=NH_2$ ,  $R_2$  varied

$$FF = -0.61 \times [\Delta(\text{HOMO-LUMO})]^2 + 4.21 \times \Delta(\text{HOMO-LUMO}) - 6.28, \quad r=0.810 \quad (\text{S84})$$

**d)**

1.  $R_1=N(C_3H_7)_2$ ,  $R_2$  varied

$$\Delta G_{\text{inject}} = 1.48 \times [\Delta(\text{HOMO-LUMO})]^2 - 10.20 \times \Delta(\text{HOMO-LUMO}) + 16.02, \quad r=0.912 \quad (\text{S85})$$

2.  $R_1=N(CH_3)_2$ ,  $R_2$  varied

$$\Delta G_{\text{inject}} = 0.96 \times [\Delta(\text{HOMO-LUMO})]^2 - 7.16 \times \Delta(\text{HOMO-LUMO}) + 11.76, \quad r=0.885 \quad (\text{S86})$$

3.  $R_1=NH_2$ ,  $R_2$  varied

$$\Delta G_{\text{inject}} = 1.19 \times [\Delta(\text{HOMO-LUMO})]^2 - 8.78 \times \Delta(\text{HOMO-LUMO}) + 14.90, \quad r=0.923 \quad (\text{S87})$$

Equations to Figure 14:

**a)**

1.  $R_1=N(C_3H_7)_2$ ,  $R_2$  varied

$$LHE = -2 \cdot 10^{-4} \times \lambda_{\text{max}}^2 + 0.19 \times \lambda_{\text{max}} - 40.84, \quad r=0.927 \quad (\text{S88})$$

2.  $R_1=N(CH_3)_2$ ,  $R_2$  varied

$$LHE = -2 \cdot 10^{-4} \times \lambda_{\text{max}}^2 + 0.16 \times \lambda_{\text{max}} - 35.03, \quad r=0.950 \quad (\text{S89})$$

3.  $R_1=NH_2$ ,  $R_2$  varied

$$LHE = -10^{-4} \times \lambda_{\text{max}}^2 + 0.11 \times \lambda_{\text{max}} - 21.78, \quad r=0.934 \quad (\text{S90})$$

**b)**

1.  $R_1=N(C_3H_7)_2$ ,  $R_2$  varied

$$V_{OC} = -2.5 \cdot 10^{-2} \times \lambda_{\text{max}} + 11.97, \quad r=0.886 \quad (\text{S91})$$

2.  $R_1=N(CH_3)_2$ ,  $R_2$  varied

$$V_{OC} = -2.4 \cdot 10^{-2} \times \lambda_{\text{max}} + 11.40, \quad r=0.880 \quad (\text{S92})$$

3.  $R_1=NH_2$ ,  $R_2$  varied

$$V_{OC} = -2.3 \cdot 10^{-2} \times \lambda_{\text{max}} + 10.27, \quad r=0.891 \quad (\text{S93})$$

c)

1.  $R_1=N(C_3H_7)_2$ ,  $R_2$  varied

$$FF = -2.5 \cdot 10^{-3} \times \lambda_{\max} + 1.97, \quad r=0.832 \quad (S94)$$

2.  $R_1=N(CH_3)_2$ ,  $R_2$  varied

$$FF = -2.9 \cdot 10^{-3} \times \lambda_{\max} + 2.12, \quad r=0.786 \quad (S95)$$

3.  $R_1=NH_2$ ,  $R_2$  varied

$$FF = -4.5 \cdot 10^{-3} \times \lambda_{\max} + 2.63, \quad r=0.726 \quad (S96)$$

d)

1.  $R_1=N(C_3H_7)_2$ ,  $R_2$  varied

$$\Delta G_{\text{inject}} = 1.9 \cdot 10^{-2} \times \lambda_{\max} - 9.34, \quad r=0.880 \quad (S97)$$

2.  $R_1=N(CH_3)_2$ ,  $R_2$  varied

$$\Delta G_{\text{inject}} = 1.8 \cdot 10^{-2} \times \lambda_{\max} - 8.86, \quad r=0.867 \quad (S98)$$

3.  $R_1=NH_2$ ,  $R_2$  varied

$$\Delta G_{\text{inject}} = 1.7 \cdot 10^{-2} \times \lambda_{\max} - 7.70, \quad r=0.880 \quad (S99)$$



## atom coordinates

**1**

|   |              |              |              |
|---|--------------|--------------|--------------|
| 7 | -2.697500000 | 0.012760000  | -0.530530000 |
| 6 | -2.484060000 | 1.453260000  | -0.336100000 |
| 6 | -3.609850000 | 2.340470000  | -0.872430000 |
| 6 | -3.230650000 | 3.823230000  | -0.799210000 |
| 6 | -4.029130000 | -0.547910000 | -0.284460000 |
| 6 | -4.426920000 | -0.653380000 | 1.195690000  |
| 6 | -5.807570000 | -1.291290000 | 1.373340000  |
| 1 | -2.305600000 | 1.685620000  | 0.725500000  |
| 1 | -1.576010000 | 1.732240000  | -0.879420000 |
| 1 | -3.824110000 | 2.060600000  | -1.909150000 |
| 1 | -4.528470000 | 2.178320000  | -0.301110000 |
| 1 | -4.046630000 | 4.451030000  | -1.164120000 |
| 1 | -3.011270000 | 4.129070000  | 0.228000000  |
| 1 | -2.347330000 | 4.040340000  | -1.406870000 |
| 1 | -4.757110000 | 0.061450000  | -0.822750000 |
| 1 | -4.065530000 | -1.534090000 | -0.753250000 |
| 1 | -3.671850000 | -1.239000000 | 1.729400000  |
| 1 | -4.422240000 | 0.345310000  | 1.646540000  |
| 1 | -6.081590000 | -1.350920000 | 2.429310000  |
| 1 | -6.584120000 | -0.713200000 | 0.862390000  |
| 1 | -5.830940000 | -2.307520000 | 0.967750000  |
| 6 | -1.625980000 | -0.834510000 | -0.367060000 |
| 6 | -1.585160000 | -2.236960000 | -0.281950000 |
| 6 | -0.234470000 | -2.614780000 | -0.194000000 |
| 6 | 0.550200000  | -1.466670000 | -0.213010000 |
| 7 | -0.335030000 | -0.390100000 | -0.300980000 |
| 6 | 1.972530000  | -1.272880000 | -0.138510000 |
| 6 | 2.482510000  | -0.042460000 | 0.308530000  |
| 6 | 3.735530000  | 0.491360000  | -0.037980000 |
| 7 | 3.945120000  | 1.971060000  | 0.663020000  |
| 1 | -2.433510000 | -2.899490000 | -0.267600000 |
| 1 | 0.128860000  | -3.623750000 | -0.069380000 |
| 1 | -0.029610000 | 0.563130000  | -0.406910000 |
| 1 | 1.833290000  | 0.597390000  | 0.884480000  |
| 8 | 4.648790000  | 0.151940000  | -0.738760000 |
| 8 | 2.992140000  | 2.504960000  | 1.221890000  |
| 8 | 5.055660000  | 2.444930000  | 0.562900000  |
| 7 | 2.736990000  | -2.327680000 | -0.506880000 |
| 6 | 4.100750000  | -2.604500000 | -0.069310000 |
| 1 | 4.249300000  | -3.685350000 | -0.083040000 |
| 1 | 4.840830000  | -2.117410000 | -0.704990000 |
| 1 | 4.239800000  | -2.242870000 | 0.951810000  |
| 1 | 2.257760000  | -3.065700000 | -0.998420000 |

**2**

|   |              |              |              |
|---|--------------|--------------|--------------|
| 6 | -2.793840000 | 0.034550000  | -0.111270000 |
| 6 | -3.000170000 | 1.398100000  | -0.364850000 |
| 6 | -1.735680000 | 2.015230000  | -0.383200000 |
| 6 | -0.766910000 | 1.049480000  | -0.134770000 |
| 7 | -1.448160000 | -0.158470000 | 0.024110000  |
| 6 | 0.667330000  | 1.127340000  | -0.040840000 |

|   |              |              |              |
|---|--------------|--------------|--------------|
| 6 | 1.437770000  | -0.022620000 | -0.274040000 |
| 6 | 2.718940000  | -0.265060000 | 0.253140000  |
| 7 | 3.273550000  | -1.737300000 | -0.235900000 |
| 7 | -3.698150000 | -0.998830000 | -0.035740000 |
| 1 | -3.949260000 | 1.876010000  | -0.538310000 |
| 1 | -1.545750000 | 3.054100000  | -0.607050000 |
| 1 | -0.996260000 | -1.013930000 | 0.303820000  |
| 7 | 1.178150000  | 2.343380000  | 0.261170000  |
| 8 | 3.465950000  | 0.317710000  | 0.989710000  |
| 6 | -3.270740000 | -2.259580000 | 0.554550000  |
| 6 | -5.101110000 | -0.639670000 | 0.121720000  |
| 1 | -4.065410000 | -2.994260000 | 0.427430000  |
| 1 | -2.390820000 | -2.649140000 | 0.036200000  |
| 1 | -3.044300000 | -2.175820000 | 1.628170000  |
| 1 | -5.711930000 | -1.530430000 | -0.027060000 |
| 1 | -5.322890000 | -0.219660000 | 1.113460000  |
| 1 | -5.386920000 | 0.090010000  | -0.637030000 |
| 8 | 2.491930000  | -2.518020000 | -0.769450000 |
| 8 | 4.444590000  | -1.955720000 | -0.015190000 |
| 1 | 0.985410000  | -0.833790000 | -0.821720000 |
| 6 | 2.512730000  | 2.829720000  | -0.071440000 |
| 1 | 0.517190000  | 3.024200000  | 0.601200000  |
| 1 | 2.462990000  | 3.914890000  | -0.172110000 |
| 1 | 2.832910000  | 2.401720000  | -1.023990000 |
| 1 | 3.247620000  | 2.557950000  | 0.686930000  |

### 3

|   |              |              |              |
|---|--------------|--------------|--------------|
| 6 | -3.302040000 | -0.882270000 | 0.117700000  |
| 6 | -3.790150000 | 0.360220000  | -0.274130000 |
| 6 | -2.680800000 | 1.227090000  | -0.378830000 |
| 6 | -1.533820000 | 0.510370000  | -0.060530000 |
| 7 | -1.948070000 | -0.787640000 | 0.234040000  |
| 6 | -0.140770000 | 0.889940000  | -0.037260000 |
| 6 | 0.842550000  | -0.089990000 | -0.225540000 |
| 6 | 2.168130000  | -0.016190000 | 0.244220000  |
| 7 | 3.007460000  | -1.369550000 | -0.177020000 |
| 1 | -4.821510000 | 0.593670000  | -0.486710000 |
| 1 | -2.707470000 | 2.249200000  | -0.724910000 |
| 1 | -1.350160000 | -1.488120000 | 0.646030000  |
| 1 | 0.548660000  | -1.020860000 | -0.683410000 |
| 8 | 2.798410000  | 0.764820000  | 0.900650000  |
| 8 | 2.400180000  | -2.311640000 | -0.674600000 |
| 8 | 4.196870000  | -1.338530000 | 0.049500000  |
| 7 | 0.104930000  | 2.205380000  | 0.153320000  |
| 6 | 1.298710000  | 2.935740000  | -0.258850000 |
| 1 | 1.016590000  | 3.975190000  | -0.431760000 |
| 1 | 2.089900000  | 2.882470000  | 0.489450000  |
| 1 | 1.683010000  | 2.514630000  | -1.190450000 |
| 1 | -0.677670000 | 2.754650000  | 0.473190000  |
| 7 | -3.965190000 | -2.056000000 | 0.445940000  |
| 1 | -4.958130000 | -2.026810000 | 0.265310000  |
| 1 | -3.551720000 | -2.905930000 | 0.084210000  |

### 4

|   |              |              |              |
|---|--------------|--------------|--------------|
| 6 | -3.301770000 | -0.902880000 | 0.128300000  |
| 6 | -3.804760000 | 0.323640000  | -0.276290000 |
| 6 | -2.690690000 | 1.187740000  | -0.397580000 |
| 6 | -1.544370000 | 0.476310000  | -0.067870000 |
| 7 | -1.955070000 | -0.816700000 | 0.244650000  |
| 6 | -0.150600000 | 0.866590000  | -0.039030000 |
| 6 | 0.840200000  | -0.102770000 | -0.224310000 |
| 6 | 2.166300000  | -0.009400000 | 0.247130000  |
| 7 | 3.032180000  | -1.340400000 | -0.179530000 |
| 1 | -4.838740000 | 0.556120000  | -0.476510000 |
| 1 | -2.719120000 | 2.208170000  | -0.747730000 |
| 1 | -1.358070000 | -1.553820000 | 0.589320000  |
| 7 | 0.079010000  | 2.184650000  | 0.148770000  |
| 8 | 2.776500000  | 0.780450000  | 0.911140000  |
| 8 | 2.450250000  | -2.273180000 | -0.721100000 |
| 8 | 4.213480000  | -1.301680000 | 0.084630000  |
| 1 | 0.559240000  | -1.037670000 | -0.682630000 |
| 6 | 1.266140000  | 2.928690000  | -0.257950000 |
| 1 | -0.709100000 | 2.724990000  | 0.470420000  |
| 1 | 0.971710000  | 3.963660000  | -0.436910000 |
| 1 | 1.661440000  | 2.508360000  | -1.185210000 |
| 1 | 2.052950000  | 2.888240000  | 0.495760000  |
| 8 | -3.884820000 | -2.086290000 | 0.412030000  |
| 1 | -4.839140000 | -2.012760000 | 0.308230000  |

## 5

|   |              |              |              |
|---|--------------|--------------|--------------|
| 6 | -3.389980000 | -1.649140000 | 0.322430000  |
| 6 | -4.083060000 | -0.550820000 | -0.153270000 |
| 6 | -3.141080000 | 0.482140000  | -0.358970000 |
| 6 | -1.887820000 | -0.009860000 | -0.005560000 |
| 7 | -2.070540000 | -1.315670000 | 0.401190000  |
| 6 | -0.573690000 | 0.613860000  | -0.026960000 |
| 6 | 0.559700000  | -0.184670000 | -0.194360000 |
| 6 | 1.863410000  | 0.148490000  | 0.234300000  |
| 7 | 2.928320000  | -1.037700000 | -0.159890000 |
| 1 | -5.143600000 | -0.507880000 | -0.343550000 |
| 1 | -3.342070000 | 1.458130000  | -0.773540000 |
| 1 | -1.335490000 | -1.902920000 | 0.764500000  |
| 7 | -0.572010000 | 1.956630000  | 0.097050000  |
| 8 | 2.345220000  | 1.057530000  | 0.848520000  |
| 8 | 2.493370000  | -2.094120000 | -0.603300000 |
| 8 | 4.095340000  | -0.775940000 | 0.029050000  |
| 1 | 0.428280000  | -1.175800000 | -0.598520000 |
| 6 | 0.471070000  | 2.873930000  | -0.349170000 |
| 1 | -1.441890000 | 2.368420000  | 0.398300000  |
| 1 | 0.004540000  | 3.836060000  | -0.563880000 |
| 1 | 0.927800000  | 2.489750000  | -1.263750000 |
| 1 | 1.256180000  | 2.996550000  | 0.397260000  |
| 1 | -3.736780000 | -2.628520000 | 0.609940000  |

## 6

|   |             |              |              |
|---|-------------|--------------|--------------|
| 6 | 3.087890000 | -0.290070000 | 0.014270000  |
| 6 | 3.399340000 | 0.989750000  | -0.398230000 |
| 6 | 2.173730000 | 1.689710000  | -0.481930000 |

|    |              |              |              |
|----|--------------|--------------|--------------|
| 6  | 1.150740000  | 0.820650000  | -0.120670000 |
| 7  | 1.740580000  | -0.395860000 | 0.173670000  |
| 6  | -0.288940000 | 1.014790000  | -0.041290000 |
| 6  | -1.136780000 | -0.075780000 | -0.237590000 |
| 6  | -2.455910000 | -0.183020000 | 0.258760000  |
| 7  | -3.143750000 | -1.596830000 | -0.207560000 |
| 17 | 4.123060000  | -1.630560000 | 0.325840000  |
| 1  | 4.386410000  | 1.357110000  | -0.624570000 |
| 1  | 2.046740000  | 2.704540000  | -0.826250000 |
| 1  | 1.254340000  | -1.206830000 | 0.526690000  |
| 1  | -0.738970000 | -0.948420000 | -0.731050000 |
| 8  | -3.147170000 | 0.492030000  | 0.967060000  |
| 8  | -2.445170000 | -2.430010000 | -0.772300000 |
| 8  | -4.319840000 | -1.716460000 | 0.053450000  |
| 7  | -0.683110000 | 2.282600000  | 0.197340000  |
| 6  | -1.976410000 | 2.872160000  | -0.132640000 |
| 1  | 0.037140000  | 2.913610000  | 0.513640000  |
| 1  | -1.833090000 | 3.944800000  | -0.267380000 |
| 1  | -2.344970000 | 2.443850000  | -1.067270000 |
| 1  | -2.720140000 | 2.687940000  | 0.642890000  |

## 7

|   |              |              |              |
|---|--------------|--------------|--------------|
| 6 | -3.104670000 | -0.410100000 | 0.064640000  |
| 6 | -3.422630000 | 0.868870000  | -0.386090000 |
| 6 | -2.222850000 | 1.588050000  | -0.494210000 |
| 6 | -1.180360000 | 0.737810000  | -0.110640000 |
| 7 | -1.738840000 | -0.466550000 | 0.217850000  |
| 6 | 0.260790000  | 0.969450000  | -0.038590000 |
| 6 | 1.126970000  | -0.105150000 | -0.224490000 |
| 6 | 2.456580000  | -0.179580000 | 0.257380000  |
| 7 | 3.167780000  | -1.581600000 | -0.198280000 |
| 1 | -4.419510000 | 1.208420000  | -0.617230000 |
| 1 | -2.108910000 | 2.596260000  | -0.861980000 |
| 1 | -1.219600000 | -1.253150000 | 0.581470000  |
| 7 | 0.620650000  | 2.249530000  | 0.179400000  |
| 8 | 3.136610000  | 0.519060000  | 0.952120000  |
| 8 | 2.476160000  | -2.438590000 | -0.734870000 |
| 8 | 4.350590000  | -1.669060000 | 0.041690000  |
| 1 | 0.741470000  | -0.994330000 | -0.697950000 |
| 6 | 1.903380000  | 2.865590000  | -0.144820000 |
| 1 | -0.116500000 | 2.868590000  | 0.480480000  |
| 1 | 1.735840000  | 3.932960000  | -0.291280000 |
| 1 | 2.289060000  | 2.436210000  | -1.071980000 |
| 1 | 2.644330000  | 2.706480000  | 0.638690000  |
| 6 | -3.959000000 | -1.555230000 | 0.358130000  |
| 8 | -5.166120000 | -1.551920000 | 0.248420000  |
| 1 | -3.420430000 | -2.465320000 | 0.700380000  |

## 8

|   |             |              |              |
|---|-------------|--------------|--------------|
| 6 | 2.891240000 | -0.040760000 | 0.037240000  |
| 6 | 3.123290000 | 1.248410000  | 0.481440000  |
| 6 | 1.861880000 | 1.868000000  | 0.543330000  |
| 6 | 0.901710000 | 0.936480000  | 0.137250000  |
| 7 | 1.556980000 | -0.226230000 | -0.164340000 |

|   |              |              |              |
|---|--------------|--------------|--------------|
| 6 | -0.553680000 | 1.059050000  | 0.023460000  |
| 6 | -1.341760000 | -0.064690000 | 0.237580000  |
| 6 | -2.661040000 | -0.243620000 | -0.254950000 |
| 7 | -3.303020000 | -1.651410000 | 0.268980000  |
| 7 | 3.810270000  | -1.104160000 | -0.229600000 |
| 1 | 4.085260000  | 1.660710000  | 0.735960000  |
| 1 | 1.659620000  | 2.867080000  | 0.896600000  |
| 1 | 1.153640000  | -1.077460000 | -0.533350000 |
| 7 | -0.992330000 | 2.303730000  | -0.251390000 |
| 8 | -3.361130000 | 0.378180000  | -0.999650000 |
| 8 | 3.331200000  | -2.161010000 | -0.645300000 |
| 8 | 4.999250000  | -0.889120000 | -0.028930000 |
| 8 | -2.611660000 | -2.377000000 | 0.971790000  |
| 8 | -4.439070000 | -1.870330000 | -0.084950000 |
| 1 | -0.904500000 | -0.906730000 | 0.751200000  |
| 6 | -2.320730000 | 2.844220000  | 0.019090000  |
| 1 | -0.294600000 | 2.956930000  | -0.573440000 |
| 1 | -2.228070000 | 3.925670000  | 0.121620000  |
| 1 | -2.697330000 | 2.429900000  | 0.956810000  |
| 1 | -3.031400000 | 2.601960000  | -0.771220000 |

**9**

|   |              |              |              |
|---|--------------|--------------|--------------|
| 7 | -2.707480000 | 0.044960000  | -0.498380000 |
| 6 | -2.507360000 | 1.481350000  | -0.262640000 |
| 6 | -3.645950000 | 2.374610000  | -0.760490000 |
| 6 | -3.280970000 | 3.857480000  | -0.635130000 |
| 6 | -4.037270000 | -0.538730000 | -0.293890000 |
| 6 | -4.441000000 | -0.712740000 | 1.177660000  |
| 6 | -5.822240000 | -1.357880000 | 1.320810000  |
| 1 | -2.322430000 | 1.680750000  | 0.804280000  |
| 1 | -1.606390000 | 1.784020000  | -0.805370000 |
| 1 | -3.862830000 | 2.131090000  | -1.805720000 |
| 1 | -4.559530000 | 2.182080000  | -0.190640000 |
| 1 | -4.105000000 | 4.489300000  | -0.973770000 |
| 1 | -3.060440000 | 4.128210000  | 0.401630000  |
| 1 | -2.402830000 | 4.105540000  | -1.238320000 |
| 1 | -4.765440000 | 0.088890000  | -0.809950000 |
| 1 | -4.061680000 | -1.502650000 | -0.806150000 |
| 1 | -3.687430000 | -1.323320000 | 1.685220000  |
| 1 | -4.436840000 | 0.264110000  | 1.673870000  |
| 1 | -6.097790000 | -1.468620000 | 2.372160000  |
| 1 | -6.597550000 | -0.755110000 | 0.837430000  |
| 1 | -5.844910000 | -2.353140000 | 0.866400000  |
| 6 | -1.628230000 | -0.792680000 | -0.400590000 |
| 6 | -1.568690000 | -2.202590000 | -0.451210000 |
| 6 | -0.222820000 | -2.569700000 | -0.375450000 |
| 6 | 0.550030000  | -1.413530000 | -0.261340000 |
| 7 | -0.348130000 | -0.338960000 | -0.266090000 |
| 6 | 1.955660000  | -1.247300000 | -0.151290000 |
| 6 | 2.517110000  | -0.026490000 | 0.228870000  |
| 6 | 3.820920000  | 0.430080000  | -0.045290000 |
| 7 | 4.028160000  | 1.954230000  | 0.556420000  |
| 1 | -2.409090000 | -2.869830000 | -0.537390000 |

|   |              |              |              |
|---|--------------|--------------|--------------|
| 1 | 0.174920000  | -3.571570000 | -0.387480000 |
| 1 | -0.064930000 | 0.626240000  | -0.268740000 |
| 8 | 2.627450000  | -2.368360000 | -0.454310000 |
| 1 | 1.866170000  | 0.696770000  | 0.694560000  |
| 8 | 4.779420000  | 0.002560000  | -0.622920000 |
| 8 | 3.057960000  | 2.549500000  | 1.015140000  |
| 8 | 5.154920000  | 2.391930000  | 0.489940000  |
| 6 | 3.893980000  | -2.664900000 | 0.169200000  |
| 1 | 3.969730000  | -3.751100000 | 0.154380000  |
| 1 | 4.709830000  | -2.209030000 | -0.387040000 |
| 1 | 3.899610000  | -2.301170000 | 1.199000000  |

## 10

|   |              |              |              |
|---|--------------|--------------|--------------|
| 6 | -2.800510000 | 0.051120000  | -0.087510000 |
| 6 | -2.990460000 | 1.436200000  | 0.078570000  |
| 6 | -1.722750000 | 2.027680000  | 0.124020000  |
| 6 | -0.759340000 | 1.026670000  | 0.005970000  |
| 7 | -1.456290000 | -0.181980000 | -0.107500000 |
| 6 | 0.660930000  | 1.105320000  | 0.008550000  |
| 6 | 1.449910000  | -0.033480000 | 0.171150000  |
| 6 | 2.789680000  | -0.206730000 | -0.232140000 |
| 7 | 3.301150000  | -1.733050000 | 0.130170000  |
| 7 | -3.722330000 | -0.949030000 | -0.245420000 |
| 1 | -3.938840000 | 1.939280000  | 0.161200000  |
| 1 | -1.502660000 | 3.075190000  | 0.251520000  |
| 1 | -1.019280000 | -1.064690000 | -0.315110000 |
| 8 | 1.099340000  | 2.360310000  | -0.162460000 |
| 1 | 0.967960000  | -0.919500000 | 0.554030000  |
| 8 | 3.612480000  | 0.461110000  | -0.789880000 |
| 6 | -3.300760000 | -2.332820000 | -0.070440000 |
| 6 | -5.114960000 | -0.631760000 | 0.045690000  |
| 1 | -4.132120000 | -2.988140000 | -0.327390000 |
| 1 | -2.479790000 | -2.578550000 | -0.749580000 |
| 1 | -2.986600000 | -2.553820000 | 0.959360000  |
| 1 | -5.746230000 | -1.437110000 | -0.329930000 |
| 1 | -5.302890000 | -0.506670000 | 1.121100000  |
| 1 | -5.403260000 | 0.285710000  | -0.468740000 |
| 8 | 2.482630000  | -2.553210000 | 0.533590000  |
| 8 | 4.480680000  | -1.941890000 | -0.043600000 |
| 6 | 2.348770000  | 2.796840000  | 0.411890000  |
| 1 | 2.235050000  | 3.870430000  | 0.553450000  |
| 1 | 2.511570000  | 2.304930000  | 1.373230000  |
| 1 | 3.175290000  | 2.576490000  | -0.259470000 |

## 11

|   |              |              |              |
|---|--------------|--------------|--------------|
| 6 | 3.308780000  | -0.890730000 | -0.073400000 |
| 6 | 3.787970000  | 0.408210000  | 0.113660000  |
| 6 | 2.671220000  | 1.258100000  | 0.157150000  |
| 6 | 1.522380000  | 0.484410000  | 0.009070000  |
| 7 | 1.950950000  | -0.841270000 | -0.124450000 |
| 6 | 0.146720000  | 0.862060000  | 0.006110000  |
| 6 | -0.862790000 | -0.083960000 | 0.160700000  |
| 6 | -2.212390000 | 0.035710000  | -0.236960000 |

|   |              |              |              |
|---|--------------|--------------|--------------|
| 7 | -3.039800000 | -1.342110000 | 0.127480000  |
| 7 | 3.993280000  | -2.073380000 | -0.268200000 |
| 1 | 4.825310000  | 0.685190000  | 0.216560000  |
| 1 | 2.674000000  | 2.325120000  | 0.309650000  |
| 1 | 1.357440000  | -1.603750000 | -0.413030000 |
| 1 | -0.578440000 | -1.055290000 | 0.534000000  |
| 8 | -2.870520000 | 0.866340000  | -0.792820000 |
| 8 | -2.415410000 | -2.317090000 | 0.532070000  |
| 8 | -4.236570000 | -1.291230000 | -0.044640000 |
| 1 | 3.573620000  | -2.907670000 | 0.118560000  |
| 1 | 4.983700000  | -2.022930000 | -0.082190000 |
| 8 | -0.011270000 | 2.180840000  | -0.159440000 |
| 6 | -1.143140000 | 2.875820000  | 0.405360000  |
| 1 | -1.420110000 | 2.425010000  | 1.360620000  |
| 1 | -1.989560000 | 2.845510000  | -0.276450000 |
| 1 | -0.799200000 | 3.897580000  | 0.557050000  |

## 12

|   |              |              |              |
|---|--------------|--------------|--------------|
| 6 | 3.312160000  | -0.908870000 | -0.078160000 |
| 6 | 3.803250000  | 0.378950000  | 0.105180000  |
| 6 | 2.679550000  | 1.226190000  | 0.159430000  |
| 6 | 1.533520000  | 0.449330000  | 0.015690000  |
| 7 | 1.961320000  | -0.872240000 | -0.125650000 |
| 6 | 0.154840000  | 0.835920000  | 0.008040000  |
| 6 | -0.860500000 | -0.099650000 | 0.154980000  |
| 6 | -2.212010000 | 0.042620000  | -0.240010000 |
| 7 | -3.065790000 | -1.314010000 | 0.126750000  |
| 1 | 4.841550000  | 0.658140000  | 0.190900000  |
| 1 | 2.681090000  | 2.294530000  | 0.300800000  |
| 1 | 1.378230000  | -1.670900000 | -0.324680000 |
| 1 | -0.588790000 | -1.078540000 | 0.518340000  |
| 8 | -2.849750000 | 0.885890000  | -0.798820000 |
| 8 | -2.463310000 | -2.287310000 | 0.564410000  |
| 8 | -4.257210000 | -1.248320000 | -0.073890000 |
| 8 | 0.013070000  | 2.155880000  | -0.150250000 |
| 6 | -1.112890000 | 2.865260000  | 0.409450000  |
| 1 | -0.751860000 | 3.878600000  | 0.576460000  |
| 1 | -1.951200000 | 2.857770000  | -0.282700000 |
| 1 | -1.408750000 | 2.408540000  | 1.356100000  |
| 8 | 3.916100000  | -2.104660000 | -0.212790000 |
| 1 | 4.872260000  | -1.994630000 | -0.179950000 |

## 13

|   |              |              |              |
|---|--------------|--------------|--------------|
| 6 | 3.404630000  | -1.665790000 | -0.189970000 |
| 6 | 4.092910000  | -0.488040000 | 0.056980000  |
| 6 | 3.137170000  | 0.540950000  | 0.159680000  |
| 6 | 1.877890000  | -0.028840000 | -0.019620000 |
| 7 | 2.074430000  | -1.382790000 | -0.230000000 |
| 6 | 0.575440000  | 0.586590000  | 0.000460000  |
| 6 | -0.575700000 | -0.172970000 | 0.135480000  |
| 6 | -1.893950000 | 0.196530000  | -0.233850000 |
| 7 | -2.952810000 | -1.008010000 | 0.123330000  |
| 1 | 5.162810000  | -0.392890000 | 0.151700000  |
| 1 | 3.317930000  | 1.585410000  | 0.354110000  |

|   |              |              |              |
|---|--------------|--------------|--------------|
| 1 | 1.347300000  | -2.043970000 | -0.453610000 |
| 1 | -0.462890000 | -1.193310000 | 0.467350000  |
| 8 | -2.389780000 | 1.142150000  | -0.769840000 |
| 8 | -2.509110000 | -2.080050000 | 0.517250000  |
| 8 | -4.120650000 | -0.738540000 | -0.040150000 |
| 8 | 0.658240000  | 1.912220000  | -0.114600000 |
| 6 | -0.346960000 | 2.788230000  | 0.439480000  |
| 1 | 0.177400000  | 3.718710000  | 0.649050000  |
| 1 | -1.152110000 | 2.944440000  | -0.273960000 |
| 1 | -0.745420000 | 2.361310000  | 1.361930000  |
| 1 | 3.765550000  | -2.670260000 | -0.343090000 |

#### 14

|    |              |              |              |
|----|--------------|--------------|--------------|
| 6  | -3.095620000 | -0.292850000 | 0.020370000  |
| 6  | -3.396970000 | 1.042810000  | -0.179040000 |
| 6  | -2.165700000 | 1.726380000  | -0.212770000 |
| 6  | -1.144990000 | 0.795730000  | -0.040150000 |
| 7  | -1.747870000 | -0.446500000 | 0.098160000  |
| 6  | 0.282510000  | 0.988650000  | -0.006760000 |
| 6  | 1.154730000  | -0.076420000 | -0.153650000 |
| 6  | 2.514760000  | -0.131170000 | 0.247950000  |
| 7  | 3.176400000  | -1.580430000 | -0.145350000 |
| 17 | -4.148950000 | -1.644650000 | 0.172070000  |
| 1  | -4.386380000 | 1.454760000  | -0.287900000 |
| 1  | -2.015540000 | 2.783420000  | -0.359300000 |
| 1  | -1.278320000 | -1.312990000 | 0.312830000  |
| 1  | 0.751160000  | -1.003940000 | -0.529320000 |
| 8  | 3.253590000  | 0.605370000  | 0.829710000  |
| 8  | 2.445270000  | -2.452070000 | -0.599620000 |
| 8  | 4.365140000  | -1.679820000 | 0.053700000  |
| 8  | 0.594250000  | 2.273380000  | 0.167590000  |
| 6  | 1.827800000  | 2.832100000  | -0.335320000 |
| 1  | 1.609920000  | 3.885190000  | -0.502710000 |
| 1  | 2.626600000  | 2.707910000  | 0.391340000  |
| 1  | 2.100030000  | 2.346920000  | -1.274620000 |

#### 15

|   |              |              |              |
|---|--------------|--------------|--------------|
| 6 | -3.113070000 | -0.420760000 | 0.046150000  |
| 6 | -3.422860000 | 0.918070000  | -0.195000000 |
| 6 | -2.217130000 | 1.627270000  | -0.240680000 |
| 6 | -1.177210000 | 0.713350000  | -0.035180000 |
| 7 | -1.746430000 | -0.522820000 | 0.135210000  |
| 6 | 0.253530000  | 0.943730000  | -0.001660000 |
| 6 | 1.143990000  | -0.102760000 | -0.139390000 |
| 6 | 2.513240000  | -0.128300000 | 0.247590000  |
| 7 | 3.200890000  | -1.561350000 | -0.147050000 |
| 1 | -4.422140000 | 1.302610000  | -0.321480000 |
| 1 | -2.081880000 | 2.682260000  | -0.414060000 |
| 1 | -1.243550000 | -1.366540000 | 0.368130000  |
| 1 | 0.755920000  | -1.043340000 | -0.498770000 |
| 8 | 3.236870000  | 0.626490000  | 0.822380000  |
| 8 | 2.480150000  | -2.450410000 | -0.583050000 |
| 8 | 4.394100000  | -1.631430000 | 0.032820000  |
| 8 | 0.527340000  | 2.236080000  | 0.157390000  |



|   |              |              |              |
|---|--------------|--------------|--------------|
| 6 | 1.757240000  | 2.825060000  | -0.321450000 |
| 1 | 1.515070000  | 3.871490000  | -0.495300000 |
| 1 | 2.543920000  | 2.722840000  | 0.421500000  |
| 1 | 2.059200000  | 2.344400000  | -1.253910000 |
| 6 | -3.979880000 | -1.584700000 | 0.200960000  |
| 8 | -5.189240000 | -1.546650000 | 0.135470000  |
| 1 | -3.448660000 | -2.542860000 | 0.388730000  |

## 16

|   |              |              |              |
|---|--------------|--------------|--------------|
| 6 | -2.899710000 | -0.035590000 | -0.011170000 |
| 6 | -3.123560000 | 1.311630000  | -0.243100000 |
| 6 | -1.856120000 | 1.914660000  | -0.262900000 |
| 6 | -0.899140000 | 0.917640000  | -0.049200000 |
| 7 | -1.565030000 | -0.271900000 | 0.103780000  |
| 6 | 0.549180000  | 1.036910000  | 0.008230000  |
| 6 | 1.356460000  | -0.069920000 | -0.132510000 |
| 6 | 2.724380000  | -0.194910000 | 0.255470000  |
| 7 | 3.329700000  | -1.645120000 | -0.187810000 |
| 7 | -3.828130000 | -1.115970000 | 0.128060000  |
| 1 | -4.087580000 | 1.772260000  | -0.379670000 |
| 1 | -1.633820000 | 2.956430000  | -0.424060000 |
| 1 | -1.180490000 | -1.179640000 | 0.328450000  |
| 1 | 0.902400000  | -0.976690000 | -0.502520000 |
| 8 | 3.482630000  | 0.498380000  | 0.860750000  |
| 8 | -3.352360000 | -2.230110000 | 0.357090000  |
| 8 | -5.019370000 | -0.858080000 | 0.011250000  |
| 8 | 2.572320000  | -2.448720000 | -0.715000000 |
| 8 | 4.503970000  | -1.810130000 | 0.045750000  |
| 8 | 0.909230000  | 2.305010000  | 0.185940000  |
| 6 | 2.186800000  | 2.813090000  | -0.260660000 |
| 1 | 2.022790000  | 3.877130000  | -0.417280000 |
| 1 | 2.950350000  | 2.640570000  | 0.493230000  |
| 1 | 2.469450000  | 2.329260000  | -1.197550000 |

## 17

|   |              |              |              |
|---|--------------|--------------|--------------|
| 7 | -2.477440000 | 0.081280000  | -0.452790000 |
| 6 | -2.221750000 | 1.487620000  | -0.112410000 |
| 6 | -3.322550000 | 2.460770000  | -0.541140000 |
| 6 | -2.898080000 | 3.913970000  | -0.305130000 |
| 6 | -3.830000000 | -0.466340000 | -0.300580000 |
| 6 | -4.238520000 | -0.761810000 | 1.149810000  |
| 6 | -5.644870000 | -1.360910000 | 1.238310000  |
| 1 | -2.033420000 | 1.600860000  | 0.966690000  |
| 1 | -1.307610000 | 1.789840000  | -0.632600000 |
| 1 | -3.546660000 | 2.305330000  | -1.601460000 |
| 1 | -4.244220000 | 2.263610000  | 0.013800000  |
| 1 | -3.694230000 | 4.602090000  | -0.597300000 |
| 1 | -2.672580000 | 4.098060000  | 0.749480000  |
| 1 | -2.007900000 | 4.170360000  | -0.886800000 |
| 1 | -4.532260000 | 0.235410000  | -0.752750000 |
| 1 | -3.892270000 | -1.376110000 | -0.900600000 |
| 1 | -3.509990000 | -1.448090000 | 1.593240000  |
| 1 | -4.193500000 | 0.162860000  | 1.735790000  |

|   |              |              |              |
|---|--------------|--------------|--------------|
| 1 | -5.921540000 | -1.562640000 | 2.275660000  |
| 1 | -6.396030000 | -0.682760000 | 0.821460000  |
| 1 | -5.709550000 | -2.305260000 | 0.689140000  |
| 6 | -1.431040000 | -0.797440000 | -0.451850000 |
| 6 | -1.425790000 | -2.197300000 | -0.650750000 |
| 6 | -0.097600000 | -2.619700000 | -0.600260000 |
| 6 | 0.726090000  | -1.511640000 | -0.365480000 |
| 7 | -0.133930000 | -0.408100000 | -0.277400000 |
| 6 | 2.120620000  | -1.444880000 | -0.233140000 |
| 6 | 2.879460000  | -0.320280000 | -0.015370000 |
| 6 | 4.294370000  | -0.433470000 | 0.102050000  |
| 7 | 4.999380000  | 1.017440000  | 0.356040000  |
| 1 | -2.289780000 | -2.816500000 | -0.820000000 |
| 1 | 0.259410000  | -3.630910000 | -0.724570000 |
| 1 | 0.169790000  | 0.524180000  | -0.054930000 |
| 1 | 2.642020000  | -2.394640000 | -0.312570000 |
| 1 | 2.456610000  | 0.669530000  | 0.071610000  |
| 8 | 5.046330000  | -1.360570000 | 0.052480000  |
| 8 | 4.279490000  | 2.009050000  | 0.417520000  |
| 8 | 6.204900000  | 1.010130000  | 0.467680000  |

## 18

|   |              |              |              |
|---|--------------|--------------|--------------|
| 6 | 2.677440000  | -0.163710000 | -0.074320000 |
| 6 | 2.861040000  | -1.560860000 | -0.025420000 |
| 6 | 1.591420000  | -2.142400000 | 0.002230000  |
| 6 | 0.625030000  | -1.129940000 | -0.018630000 |
| 7 | 1.334320000  | 0.077720000  | -0.060110000 |
| 6 | -0.775370000 | -1.231110000 | 0.006430000  |
| 6 | -1.680750000 | -0.199930000 | -0.011340000 |
| 6 | -3.077620000 | -0.484740000 | 0.021780000  |
| 7 | -3.975620000 | 0.877800000  | -0.005090000 |
| 7 | 3.604620000  | 0.835840000  | -0.155440000 |
| 1 | 3.807450000  | -2.073810000 | -0.011290000 |
| 1 | 1.369410000  | -3.198130000 | 0.039430000  |
| 1 | 0.904590000  | 0.987050000  | -0.075510000 |
| 1 | -1.167360000 | -2.243570000 | 0.044230000  |
| 1 | -1.392260000 | 0.840000000  | -0.050160000 |
| 8 | -3.700310000 | -1.502710000 | 0.064820000  |
| 6 | 3.192410000  | 2.212350000  | 0.083350000  |
| 6 | 4.999790000  | 0.493580000  | 0.094590000  |
| 1 | 4.027090000  | 2.874070000  | -0.144330000 |
| 1 | 2.371940000  | 2.491460000  | -0.583450000 |
| 1 | 2.882870000  | 2.388570000  | 1.123220000  |
| 1 | 5.629340000  | 1.322610000  | -0.228340000 |
| 1 | 5.198450000  | 0.289980000  | 1.155430000  |
| 1 | 5.279150000  | -0.384330000 | -0.488950000 |
| 8 | -3.390590000 | 1.954970000  | -0.050600000 |
| 8 | -5.175870000 | 0.723630000  | 0.022300000  |

## 19

|   |              |              |              |
|---|--------------|--------------|--------------|
| 6 | -3.344500000 | 0.534610000  | -0.000890000 |
| 6 | -3.717540000 | -0.814180000 | 0.026660000  |
| 6 | -2.535100000 | -1.565000000 | 0.018940000  |
| 6 | -1.444140000 | -0.690020000 | -0.007710000 |

|   |              |              |              |
|---|--------------|--------------|--------------|
| 7 | -1.986940000 | 0.601840000  | -0.015240000 |
| 6 | -0.067180000 | -0.980420000 | -0.006680000 |
| 6 | 0.968400000  | -0.084040000 | -0.001210000 |
| 6 | 2.315180000  | -0.561730000 | -0.005960000 |
| 7 | 3.394840000  | 0.659490000  | 0.006890000  |
| 7 | -4.127770000 | 1.663040000  | -0.079020000 |
| 1 | -4.730460000 | -1.183200000 | 0.054890000  |
| 1 | -2.454820000 | -2.641020000 | 0.046230000  |
| 1 | -1.451390000 | 1.448340000  | -0.124820000 |
| 1 | 0.826270000  | 0.986380000  | 0.010180000  |
| 8 | 2.786150000  | -1.657850000 | -0.016530000 |
| 8 | 2.964560000  | 1.807620000  | 0.016900000  |
| 8 | 4.561220000  | 0.337200000  | 0.005760000  |
| 1 | -3.770060000 | 2.505980000  | 0.347350000  |
| 1 | -5.109610000 | 1.519470000  | 0.101950000  |
| 1 | 0.183130000  | -2.037630000 | -0.012090000 |

## 20

|   |              |              |              |
|---|--------------|--------------|--------------|
| 6 | -3.346280000 | 0.546940000  | 0.000390000  |
| 6 | -3.731560000 | -0.790760000 | 0.000250000  |
| 6 | -2.541710000 | -1.539740000 | 0.000230000  |
| 6 | -1.455190000 | -0.661070000 | 0.000070000  |
| 7 | -1.996560000 | 0.627550000  | 0.000320000  |
| 6 | -0.074500000 | -0.956640000 | -0.000160000 |
| 6 | 0.962670000  | -0.068160000 | -0.000210000 |
| 6 | 2.309040000  | -0.560340000 | -0.000430000 |
| 8 | 2.762240000  | -1.662640000 | -0.000470000 |
| 8 | -4.047340000 | 1.693840000  | 0.000540000  |
| 1 | -4.744420000 | -1.161140000 | 0.000240000  |
| 1 | -2.459290000 | -2.615820000 | 0.000190000  |
| 1 | -1.482280000 | 1.494760000  | 0.000370000  |
| 1 | 0.169560000  | -2.015420000 | -0.000270000 |
| 1 | 0.828700000  | 1.003440000  | -0.000100000 |
| 7 | 3.402450000  | 0.644210000  | -0.000260000 |
| 8 | 4.564110000  | 0.306340000  | -0.000290000 |
| 8 | 2.983920000  | 1.795830000  | -0.000060000 |
| 1 | -4.991670000 | 1.503580000  | 0.000560000  |

## 21

|   |              |              |              |
|---|--------------|--------------|--------------|
| 6 | 3.649360000  | -1.096730000 | 0.000290000  |
| 6 | 4.158920000  | 0.193560000  | 0.000360000  |
| 6 | 3.060330000  | 1.071310000  | 0.000260000  |
| 6 | 1.890300000  | 0.304630000  | 0.000120000  |
| 7 | 2.290880000  | -1.022610000 | 0.000260000  |
| 6 | 0.540710000  | 0.746770000  | -0.000060000 |
| 6 | -0.578790000 | -0.027880000 | -0.000160000 |
| 6 | -1.872420000 | 0.600790000  | -0.000300000 |
| 8 | -2.206670000 | 1.742980000  | -0.000300000 |
| 1 | 4.156860000  | -2.048330000 | 0.000330000  |
| 1 | 5.204530000  | 0.456390000  | 0.000460000  |
| 1 | 3.088390000  | 2.150210000  | 0.000250000  |
| 1 | 1.670550000  | -1.816470000 | 0.000270000  |
| 1 | 0.408120000  | 1.825120000  | -0.000110000 |
| 1 | -0.557320000 | -1.107660000 | -0.000100000 |

|   |              |              |              |
|---|--------------|--------------|--------------|
| 7 | -3.082530000 | -0.484500000 | -0.000120000 |
| 8 | -4.202610000 | -0.029250000 | -0.000430000 |
| 8 | -2.780710000 | -1.671750000 | 0.000090000  |

## 22

|    |              |              |              |
|----|--------------|--------------|--------------|
| 6  | 3.017860000  | -0.090500000 | -0.000010000 |
| 6  | 3.276500000  | 1.269950000  | 0.000070000  |
| 6  | 2.022690000  | 1.907320000  | -0.000010000 |
| 6  | 1.024520000  | 0.929540000  | 0.000000000  |
| 7  | 1.675170000  | -0.298670000 | -0.000010000 |
| 6  | -0.384590000 | 1.100290000  | 0.000000000  |
| 6  | -1.332480000 | 0.123780000  | 0.000010000  |
| 6  | -2.723370000 | 0.493250000  | -0.000010000 |
| 7  | -3.703750000 | -0.800660000 | -0.000020000 |
| 17 | 4.116870000  | -1.412250000 | -0.000020000 |
| 1  | 4.253330000  | 1.723850000  | 0.000140000  |
| 1  | 1.841440000  | 2.971230000  | -0.000010000 |
| 1  | 1.236560000  | -1.206550000 | -0.000070000 |
| 1  | -1.103320000 | -0.931690000 | 0.000020000  |
| 8  | -3.266900000 | 1.551920000  | -0.000030000 |
| 8  | -3.180520000 | -1.908170000 | 0.000070000  |
| 8  | -4.890030000 | -0.567250000 | -0.000010000 |
| 1  | -0.721890000 | 2.133100000  | -0.000010000 |

## 23

|   |              |              |              |
|---|--------------|--------------|--------------|
| 6 | 3.042240000  | -0.212920000 | 0.000210000  |
| 6 | 3.304710000  | 1.158030000  | 0.000260000  |
| 6 | 2.072170000  | 1.817190000  | 0.000140000  |
| 6 | 1.057460000  | 0.846120000  | 0.000090000  |
| 7 | 1.679430000  | -0.379450000 | 0.000020000  |
| 6 | -0.354780000 | 1.049230000  | 0.000030000  |
| 6 | -1.316010000 | 0.091260000  | -0.000080000 |
| 6 | -2.706350000 | 0.484870000  | -0.000150000 |
| 8 | -3.224310000 | 1.554410000  | -0.000140000 |
| 6 | 3.955590000  | -1.352640000 | 0.000280000  |
| 1 | 4.291220000  | 1.592680000  | 0.000360000  |
| 1 | 1.901720000  | 2.882960000  | 0.000140000  |
| 1 | 1.210330000  | -1.272830000 | -0.000070000 |
| 1 | -0.672160000 | 2.088110000  | 0.000050000  |
| 1 | -1.106450000 | -0.968390000 | -0.000120000 |
| 7 | -3.708310000 | -0.787710000 | -0.000300000 |
| 8 | -4.889290000 | -0.532640000 | -0.000340000 |
| 8 | -3.201310000 | -1.902390000 | -0.000290000 |
| 8 | 5.163020000  | -1.255690000 | 0.000360000  |
| 1 | 3.462510000  | -2.348740000 | 0.000160000  |

## 24

|   |              |              |              |
|---|--------------|--------------|--------------|
| 6 | 2.777010000  | 0.115770000  | -0.000050000 |
| 6 | 2.987280000  | 1.485510000  | -0.000020000 |
| 6 | 1.710990000  | 2.066010000  | 0.000460000  |
| 6 | 0.756420000  | 1.037330000  | 0.000190000  |
| 7 | 1.444170000  | -0.153020000 | 0.000150000  |
| 6 | -0.668400000 | 1.161240000  | 0.000230000  |
| 6 | -1.572220000 | 0.152840000  | 0.000160000  |

|   |              |              |              |
|---|--------------|--------------|--------------|
| 6 | -2.985440000 | 0.475820000  | 0.000280000  |
| 7 | -3.923670000 | -0.839330000 | -0.000130000 |
| 7 | 3.720550000  | -0.961510000 | -0.000270000 |
| 1 | 3.948090000  | 1.972080000  | -0.000150000 |
| 1 | 1.480610000  | 3.120110000  | 0.000710000  |
| 1 | 1.073560000  | -1.093370000 | 0.000140000  |
| 1 | -1.041030000 | 2.181560000  | 0.000400000  |
| 1 | -1.305670000 | -0.894150000 | 0.000030000  |
| 8 | -3.549170000 | 1.521020000  | 0.000260000  |
| 8 | 3.255990000  | -2.103670000 | -0.000260000 |
| 8 | 4.910230000  | -0.673220000 | -0.000400000 |
| 8 | -5.115100000 | -0.639790000 | -0.000150000 |
| 8 | -3.361560000 | -1.926370000 | -0.000310000 |

## 25

|   |              |              |              |
|---|--------------|--------------|--------------|
| 7 | -3.146410000 | -0.123490000 | -0.455400000 |
| 6 | -3.215850000 | 1.313460000  | -0.153110000 |
| 6 | -4.506220000 | 2.002060000  | -0.603210000 |
| 6 | -4.418720000 | 3.519520000  | -0.409200000 |
| 6 | -4.345110000 | -0.956910000 | -0.307090000 |
| 6 | -4.700850000 | -1.307970000 | 1.144560000  |
| 6 | -5.945470000 | -2.195650000 | 1.230360000  |
| 1 | -3.061900000 | 1.492440000  | 0.922430000  |
| 1 | -2.391090000 | 1.799750000  | -0.683420000 |
| 1 | -4.687750000 | 1.771670000  | -1.658010000 |
| 1 | -5.360930000 | 1.618070000  | -0.038930000 |
| 1 | -5.348970000 | 4.002570000  | -0.715670000 |
| 1 | -4.240800000 | 3.779130000  | 0.638530000  |
| 1 | -3.608620000 | 3.952620000  | -1.002900000 |
| 1 | -5.178190000 | -0.437940000 | -0.782940000 |
| 1 | -4.192800000 | -1.868660000 | -0.888060000 |
| 1 | -3.847560000 | -1.812020000 | 1.609480000  |
| 1 | -4.865950000 | -0.385320000 | 1.712030000  |
| 1 | -6.188490000 | -2.431730000 | 2.268840000  |
| 1 | -6.818490000 | -1.704130000 | 0.789680000  |
| 1 | -5.796010000 | -3.142380000 | 0.702320000  |
| 6 | -1.930980000 | -0.744080000 | -0.419560000 |
| 6 | -1.603870000 | -2.109360000 | -0.578960000 |
| 6 | -0.215930000 | -2.220320000 | -0.492360000 |
| 6 | 0.324440000  | -0.949670000 | -0.277040000 |
| 7 | -0.758330000 | -0.065110000 | -0.238670000 |
| 6 | 1.676220000  | -0.540110000 | -0.129540000 |
| 6 | 2.053230000  | 0.790050000  | 0.018960000  |
| 6 | 3.381020000  | 1.239310000  | 0.197420000  |
| 7 | 3.422940000  | 2.877610000  | 0.333430000  |
| 1 | -2.299620000 | -2.913140000 | -0.747380000 |
| 1 | 0.364500000  | -3.124500000 | -0.584800000 |
| 1 | -0.686380000 | 0.910730000  | -0.008080000 |
| 7 | 2.582100000  | -1.566240000 | -0.146060000 |
| 1 | 1.298370000  | 1.559020000  | -0.006310000 |
| 8 | 4.447210000  | 0.704340000  | 0.269110000  |
| 8 | 2.364080000  | 3.497220000  | 0.289280000  |
| 8 | 4.521230000  | 3.364710000  | 0.472340000  |

|    |             |              |              |
|----|-------------|--------------|--------------|
| 6  | 3.666440000 | -2.069820000 | -0.099990000 |
| 16 | 5.014900000 | -2.879930000 | -0.059570000 |

**26**

|    |              |              |              |
|----|--------------|--------------|--------------|
| 6  | 3.141940000  | -0.341500000 | -0.077750000 |
| 6  | 2.958510000  | -1.738670000 | -0.061150000 |
| 6  | 1.581800000  | -1.976070000 | -0.046940000 |
| 6  | 0.914270000  | -0.749130000 | -0.045630000 |
| 7  | 1.904700000  | 0.237220000  | -0.059110000 |
| 6  | -0.479040000 | -0.463360000 | -0.024400000 |
| 6  | -0.986120000 | 0.829890000  | -0.025840000 |
| 6  | -2.361430000 | 1.159410000  | 0.000150000  |
| 7  | -2.566780000 | 2.789080000  | -0.008310000 |
| 7  | 4.292610000  | 0.390150000  | -0.134000000 |
| 1  | 3.739530000  | -2.479540000 | -0.058150000 |
| 1  | 1.094300000  | -2.937810000 | -0.034000000 |
| 1  | 1.728450000  | 1.227270000  | -0.052540000 |
| 7  | -1.280770000 | -1.571700000 | -0.001310000 |
| 1  | -0.305490000 | 1.665360000  | -0.048330000 |
| 8  | -3.374490000 | 0.526850000  | 0.026430000  |
| 6  | 4.243230000  | 1.822100000  | 0.130150000  |
| 6  | 5.554430000  | -0.301770000 | 0.102080000  |
| 1  | 5.221540000  | 2.252540000  | -0.079200000 |
| 1  | 3.528640000  | 2.314210000  | -0.535480000 |
| 1  | 3.978000000  | 2.051750000  | 1.171610000  |
| 1  | 6.374400000  | 0.347130000  | -0.204900000 |
| 1  | 5.692880000  | -0.572820000 | 1.157190000  |
| 1  | 5.602270000  | -1.208250000 | -0.502300000 |
| 8  | -1.569490000 | 3.504200000  | -0.030010000 |
| 8  | -3.713140000 | 3.173300000  | 0.008400000  |
| 6  | -2.316350000 | -2.171760000 | 0.019420000  |
| 16 | -3.584590000 | -3.101420000 | 0.046630000  |

**27**

|    |              |              |              |
|----|--------------|--------------|--------------|
| 7  | 3.924520000  | -2.791850000 | -0.128200000 |
| 6  | 3.246140000  | -1.600480000 | -0.011520000 |
| 6  | 3.731820000  | -0.292690000 | 0.070540000  |
| 6  | 2.619220000  | 0.561030000  | 0.076300000  |
| 6  | 1.463000000  | -0.215990000 | 0.005600000  |
| 7  | 1.886340000  | -1.548500000 | -0.041180000 |
| 6  | 0.086000000  | 0.164970000  | 0.009550000  |
| 6  | -0.958380000 | -0.741450000 | 0.016800000  |
| 6  | -2.328970000 | -0.364330000 | -0.004580000 |
| 7  | -3.294970000 | -1.692860000 | 0.012740000  |
| 1  | 4.771140000  | -0.010990000 | 0.127030000  |
| 1  | 2.642010000  | 1.636880000  | 0.147950000  |
| 1  | 1.287550000  | -2.339700000 | -0.216600000 |
| 7  | -0.165660000 | 1.504880000  | 0.004240000  |
| 1  | -0.756140000 | -1.799180000 | 0.047990000  |
| 8  | -2.905160000 | 0.678060000  | -0.032520000 |
| 8  | -4.484360000 | -1.476950000 | 0.001740000  |
| 8  | -2.762710000 | -2.797960000 | 0.035090000  |
| 6  | -0.029270000 | 2.685810000  | -0.006330000 |
| 16 | 0.089400000  | 4.259720000  | -0.021350000 |

|   |             |              |             |
|---|-------------|--------------|-------------|
| 1 | 4.916620000 | -2.740470000 | 0.046880000 |
| 1 | 3.497180000 | -3.610050000 | 0.282460000 |

## 28

|    |              |              |              |
|----|--------------|--------------|--------------|
| 6  | -3.772730000 | -0.454550000 | -0.000030000 |
| 6  | -3.864220000 | 0.933130000  | 0.000110000  |
| 6  | -2.542330000 | 1.414510000  | -0.000090000 |
| 6  | -1.672710000 | 0.325210000  | 0.000050000  |
| 7  | -2.469300000 | -0.819610000 | -0.000110000 |
| 6  | -0.240960000 | 0.299850000  | 0.000130000  |
| 6  | 0.491130000  | -0.873500000 | 0.000010000  |
| 6  | 1.910140000  | -0.937240000 | 0.000180000  |
| 7  | 2.427890000  | -2.489140000 | -0.000060000 |
| 1  | -4.774110000 | 1.511940000  | 0.000240000  |
| 1  | -2.232140000 | 2.447000000  | -0.000120000 |
| 1  | -2.156090000 | -1.777820000 | -0.000100000 |
| 7  | 0.335050000  | 1.538180000  | 0.000290000  |
| 1  | -0.022330000 | -1.821440000 | -0.000210000 |
| 8  | 2.775690000  | -0.116070000 | 0.000370000  |
| 8  | 1.585630000  | -3.379850000 | -0.000310000 |
| 8  | 3.627000000  | -2.641470000 | 0.000030000  |
| 6  | 1.244290000  | 2.319290000  | 0.000090000  |
| 16 | 2.316940000  | 3.465970000  | -0.000240000 |
| 8  | -4.697780000 | -1.429460000 | -0.000010000 |
| 1  | -5.581780000 | -1.046730000 | -0.000180000 |

## 29

|    |              |              |              |
|----|--------------|--------------|--------------|
| 6  | 3.790660000  | -1.708990000 | -0.000100000 |
| 6  | 4.259830000  | -0.404960000 | 0.000080000  |
| 6  | 3.136000000  | 0.441730000  | -0.000030000 |
| 6  | 1.994960000  | -0.361360000 | -0.000050000 |
| 7  | 2.429390000  | -1.674910000 | 0.000090000  |
| 6  | 0.607080000  | 0.025330000  | -0.000080000 |
| 6  | -0.425250000 | -0.889960000 | 0.000070000  |
| 6  | -1.807190000 | -0.547120000 | -0.000030000 |
| 7  | -2.745650000 | -1.885240000 | 0.000050000  |
| 1  | 5.296440000  | -0.108730000 | 0.000160000  |
| 1  | 3.130700000  | 1.519780000  | -0.000040000 |
| 1  | 1.837230000  | -2.489690000 | 0.000110000  |
| 7  | 0.407450000  | 1.373560000  | -0.000240000 |
| 1  | -0.203590000 | -1.944870000 | 0.000260000  |
| 8  | -2.399320000 | 0.487340000  | -0.000270000 |
| 8  | -2.190470000 | -2.977950000 | 0.000210000  |
| 8  | -3.937810000 | -1.688810000 | -0.000060000 |
| 6  | -0.231230000 | 2.388290000  | -0.000090000 |
| 16 | -0.921940000 | 3.797100000  | 0.000170000  |
| 1  | 4.323560000  | -2.646400000 | -0.000150000 |

## 30

|   |              |              |              |
|---|--------------|--------------|--------------|
| 6 | -3.465870000 | -0.125700000 | 0.000020000  |
| 6 | -3.371550000 | -1.506050000 | -0.000070000 |
| 6 | -1.997050000 | -1.808550000 | 0.000110000  |
| 6 | -1.283660000 | -0.611300000 | 0.000010000  |
| 7 | -2.217340000 | 0.414110000  | 0.000020000  |

|    |              |              |              |
|----|--------------|--------------|--------------|
| 6  | 0.141130000  | -0.398050000 | -0.000020000 |
| 6  | 0.708720000  | 0.858860000  | -0.000040000 |
| 6  | 2.110950000  | 1.109250000  | -0.000050000 |
| 7  | 2.424620000  | 2.710950000  | -0.000030000 |
| 17 | -4.859760000 | 0.878930000  | -0.000010000 |
| 1  | -4.200700000 | -2.193610000 | -0.000150000 |
| 1  | -1.552190000 | -2.790560000 | 0.000170000  |
| 1  | -2.026690000 | 1.404000000  | 0.000040000  |
| 1  | 0.075590000  | 1.731430000  | -0.000050000 |
| 8  | 3.071350000  | 0.403180000  | -0.000010000 |
| 8  | 1.472930000  | 3.483030000  | 0.000000000  |
| 8  | 3.593760000  | 3.015470000  | 0.000060000  |
| 7  | 0.868510000  | -1.550750000 | 0.000020000  |
| 6  | 1.874120000  | -2.205800000 | 0.000000000  |
| 16 | 3.086510000  | -3.200160000 | -0.000010000 |

**31**

|    |              |              |              |
|----|--------------|--------------|--------------|
| 6  | -3.511270000 | -0.106420000 | -0.000010000 |
| 6  | -3.462910000 | 1.287210000  | 0.000270000  |
| 6  | -2.114710000 | 1.659860000  | 0.000060000  |
| 6  | -1.345640000 | 0.488860000  | 0.000080000  |
| 7  | -2.217490000 | -0.569890000 | -0.000080000 |
| 6  | 0.096690000  | 0.352720000  | 0.000100000  |
| 6  | 0.724570000  | -0.872070000 | -0.000040000 |
| 6  | 2.141300000  | -1.052500000 | 0.000000000  |
| 7  | 2.537620000  | -2.632460000 | -0.000030000 |
| 1  | -4.327740000 | 1.930820000  | 0.000430000  |
| 1  | -1.711720000 | 2.659790000  | 0.000070000  |
| 1  | -1.962040000 | -1.545790000 | -0.000120000 |
| 7  | 0.758120000  | 1.542020000  | 0.000230000  |
| 1  | 0.137640000  | -1.776460000 | -0.000170000 |
| 8  | 3.059820000  | -0.294340000 | 0.000180000  |
| 8  | 1.625180000  | -3.450160000 | -0.000120000 |
| 8  | 3.720440000  | -2.875410000 | 0.000110000  |
| 6  | 1.732180000  | 2.245730000  | 0.000060000  |
| 16 | 2.892700000  | 3.297290000  | -0.000220000 |
| 6  | -4.652180000 | -1.017920000 | -0.000140000 |
| 8  | -5.808520000 | -0.657270000 | -0.000090000 |
| 1  | -4.390580000 | -2.098110000 | -0.000400000 |

**32**

|   |              |              |              |
|---|--------------|--------------|--------------|
| 6 | -3.230140000 | -0.294290000 | -0.000020000 |
| 6 | -3.093360000 | -1.671970000 | -0.000360000 |
| 6 | -1.712250000 | -1.919970000 | -0.000690000 |
| 6 | -1.048160000 | -0.687950000 | -0.000490000 |
| 7 | -2.003830000 | 0.296210000  | -0.000110000 |
| 6 | 0.382330000  | -0.430830000 | -0.000620000 |
| 6 | 0.900420000  | 0.841170000  | -0.000130000 |
| 6 | 2.301260000  | 1.138210000  | -0.000430000 |
| 7 | 2.573760000  | 2.738570000  | 0.000120000  |
| 7 | -4.408910000 | 0.518800000  | 0.000350000  |
| 1 | -3.902130000 | -2.383230000 | -0.000370000 |
| 1 | -1.226590000 | -2.882090000 | -0.001010000 |
| 1 | -1.883030000 | 1.299760000  | 0.000020000  |



|    |              |              |              |
|----|--------------|--------------|--------------|
| 7  | 1.134030000  | -1.564460000 | -0.001220000 |
| 1  | 0.237660000  | 1.691890000  | 0.000460000  |
| 8  | 3.272740000  | 0.449900000  | -0.001090000 |
| 8  | -4.238630000 | 1.739840000  | 0.000550000  |
| 8  | -5.491040000 | -0.052810000 | 0.000410000  |
| 8  | 1.599350000  | 3.479610000  | 0.000920000  |
| 8  | 3.734470000  | 3.071470000  | -0.000170000 |
| 6  | 2.169480000  | -2.177220000 | -0.000080000 |
| 16 | 3.417250000  | -3.121070000 | 0.001180000  |

**33**

|    |              |              |              |
|----|--------------|--------------|--------------|
| 14 | 2.586310000  | -1.359880000 | 0.179890000  |
| 6  | -2.462310000 | -0.470760000 | -0.574150000 |
| 6  | -2.135740000 | -1.835150000 | -0.762740000 |
| 6  | -0.758840000 | -1.956470000 | -0.627040000 |
| 6  | -0.197390000 | -0.689230000 | -0.367040000 |
| 7  | -1.293940000 | 0.198750000  | -0.364890000 |
| 6  | 1.127590000  | -0.204720000 | -0.229720000 |
| 6  | 1.344620000  | 1.167200000  | -0.338520000 |
| 6  | 2.576840000  | 1.841390000  | -0.148550000 |
| 7  | 2.413000000  | 3.448480000  | -0.362160000 |
| 1  | -2.829450000 | -2.630960000 | -0.973620000 |
| 1  | -0.203060000 | -2.868510000 | -0.745840000 |
| 1  | -1.231770000 | 1.149390000  | -0.042100000 |
| 1  | 0.533450000  | 1.816610000  | -0.630380000 |
| 8  | 3.683760000  | 1.478380000  | 0.123560000  |
| 8  | 1.282750000  | 3.909310000  | -0.499550000 |
| 8  | 3.439960000  | 4.086810000  | -0.355470000 |
| 17 | 3.337860000  | -0.936540000 | 2.044550000  |
| 17 | 2.040580000  | -3.359790000 | 0.308840000  |
| 17 | 4.019800000  | -1.306160000 | -1.287700000 |
| 7  | -3.669860000 | 0.142130000  | -0.590920000 |
| 6  | -4.883170000 | -0.663710000 | -0.764070000 |
| 6  | -3.778440000 | 1.593910000  | -0.421430000 |
| 1  | -4.680120000 | -1.440410000 | -1.507710000 |
| 6  | -5.423850000 | -1.301990000 | 0.523330000  |
| 1  | -5.642570000 | -0.011040000 | -1.202740000 |
| 1  | -4.698300000 | 1.908710000  | -0.920510000 |
| 6  | -3.790740000 | 2.090640000  | 1.034460000  |
| 1  | -2.961100000 | 2.071690000  | -0.974430000 |
| 6  | -6.657800000 | -2.167440000 | 0.254310000  |
| 1  | -4.634770000 | -1.905440000 | 0.982560000  |
| 1  | -5.671690000 | -0.514310000 | 1.241530000  |
| 6  | -3.842870000 | 3.619080000  | 1.111490000  |
| 1  | -4.653190000 | 1.660050000  | 1.551800000  |
| 1  | -2.904950000 | 1.720320000  | 1.561680000  |
| 1  | -7.033610000 | -2.610400000 | 1.179240000  |
| 1  | -7.470250000 | -1.580400000 | -0.185220000 |
| 1  | -6.429150000 | -2.985950000 | -0.435130000 |
| 1  | -3.865270000 | 3.956210000  | 2.149930000  |
| 1  | -2.970090000 | 4.075190000  | 0.634980000  |
| 1  | -4.736000000 | 4.011880000  | 0.616110000  |

**34**

|    |              |              |              |
|----|--------------|--------------|--------------|
| 14 | 1.654030000  | -1.302190000 | 0.061170000  |
| 6  | -3.413470000 | -0.261530000 | -0.154310000 |
| 6  | -3.144100000 | -1.604460000 | -0.497400000 |
| 6  | -1.762260000 | -1.761320000 | -0.503420000 |
| 6  | -1.148900000 | -0.534570000 | -0.181830000 |
| 7  | -2.216150000 | 0.366880000  | 0.009970000  |
| 6  | 0.197640000  | -0.086690000 | -0.133300000 |
| 6  | 0.438840000  | 1.282670000  | -0.164290000 |
| 6  | 1.705000000  | 1.914620000  | -0.047860000 |
| 7  | 1.573060000  | 3.534140000  | -0.131260000 |
| 1  | -3.875200000 | -2.364170000 | -0.714840000 |
| 1  | -1.243410000 | -2.667660000 | -0.757010000 |
| 1  | -2.101180000 | 1.283180000  | 0.410030000  |
| 1  | -0.378270000 | 1.967900000  | -0.332080000 |
| 8  | 2.819490000  | 1.503260000  | 0.087300000  |
| 8  | 0.449750000  | 4.029370000  | -0.117610000 |
| 8  | 2.615410000  | 4.144180000  | -0.187500000 |
| 17 | 2.588000000  | -1.021170000 | 1.868960000  |
| 17 | 1.057010000  | -3.289510000 | 0.115660000  |
| 17 | 2.944170000  | -1.186070000 | -1.529990000 |
| 7  | -4.602840000 | 0.378150000  | -0.008150000 |
| 6  | -5.824320000 | -0.416420000 | 0.060390000  |
| 6  | -4.634570000 | 1.738730000  | 0.512610000  |
| 1  | -5.818030000 | -1.181820000 | -0.715760000 |
| 1  | -6.678870000 | 0.235320000  | -0.120440000 |
| 1  | -5.639150000 | 2.140270000  | 0.387950000  |
| 1  | -3.954310000 | 2.381180000  | -0.052540000 |
| 1  | -5.949650000 | -0.902670000 | 1.036080000  |
| 1  | -4.373210000 | 1.788970000  | 1.578650000  |

### 35

|    |              |              |              |
|----|--------------|--------------|--------------|
| 14 | 0.621770000  | -1.541370000 | 0.035710000  |
| 6  | -3.772070000 | 1.179520000  | 0.027170000  |
| 6  | -3.992490000 | -0.137970000 | -0.399910000 |
| 6  | -2.747580000 | -0.763290000 | -0.461350000 |
| 6  | -1.746360000 | 0.157450000  | -0.100700000 |
| 7  | -2.436440000 | 1.355390000  | 0.177270000  |
| 6  | -0.323900000 | 0.113320000  | -0.092090000 |
| 6  | 0.373140000  | 1.312490000  | -0.106040000 |
| 6  | 1.787060000  | 1.459770000  | -0.035870000 |
| 7  | 2.229690000  | 3.021260000  | -0.079740000 |
| 1  | -4.952150000 | -0.570920000 | -0.632910000 |
| 1  | -2.575190000 | -1.775990000 | -0.777330000 |
| 1  | -2.003510000 | 2.179090000  | 0.564360000  |
| 1  | -0.158990000 | 2.244470000  | -0.225630000 |
| 8  | 2.686640000  | 0.676870000  | 0.035270000  |
| 8  | 1.354120000  | 3.874450000  | 0.026210000  |
| 8  | 3.414280000  | 3.229290000  | -0.200400000 |
| 17 | 1.657710000  | -1.636930000 | 1.806070000  |
| 17 | -0.639720000 | -3.186040000 | 0.107550000  |
| 17 | 1.810210000  | -1.853590000 | -1.606170000 |
| 7  | -4.673680000 | 2.185010000  | 0.236710000  |
| 1  | -5.639430000 | 1.916960000  | 0.340250000  |
| 1  | -4.399040000 | 2.982660000  | 0.789180000  |

**36**

|    |              |              |              |
|----|--------------|--------------|--------------|
| 14 | 0.555950000  | -1.557260000 | 0.042510000  |
| 8  | -4.512040000 | 2.348270000  | 0.348440000  |
| 6  | -3.722520000 | 1.310250000  | 0.034320000  |
| 6  | -3.993190000 | 0.035230000  | -0.453930000 |
| 6  | -2.760590000 | -0.629960000 | -0.522100000 |
| 6  | -1.743320000 | 0.239650000  | -0.099570000 |
| 7  | -2.392370000 | 1.444190000  | 0.220610000  |
| 6  | -0.315680000 | 0.141830000  | -0.086560000 |
| 6  | 0.420160000  | 1.309610000  | -0.096510000 |
| 6  | 1.846900000  | 1.395180000  | -0.054790000 |
| 7  | 2.363580000  | 2.928940000  | -0.078720000 |
| 1  | -4.962200000 | -0.354480000 | -0.722400000 |
| 1  | -2.614050000 | -1.630150000 | -0.887850000 |
| 1  | -1.970460000 | 2.241640000  | 0.672020000  |
| 1  | -0.078420000 | 2.262910000  | -0.194540000 |
| 8  | 2.703540000  | 0.565600000  | -0.023390000 |
| 8  | 1.529600000  | 3.816520000  | 0.058920000  |
| 8  | 3.554390000  | 3.080790000  | -0.218390000 |
| 17 | 1.630780000  | -1.679530000 | 1.786410000  |
| 17 | -0.790710000 | -3.125660000 | 0.173410000  |
| 17 | 1.682630000  | -1.944500000 | -1.625660000 |
| 1  | -5.437120000 | 2.114470000  | 0.213940000  |

**37**

|    |              |              |              |
|----|--------------|--------------|--------------|
| 14 | -0.649270000 | -1.324620000 | 0.037070000  |
| 1  | -2.298780000 | 4.589090000  | 0.554830000  |
| 6  | -2.250960000 | 3.563960000  | 0.223140000  |
| 6  | -3.209710000 | 2.767530000  | -0.383560000 |
| 6  | -2.651840000 | 1.487640000  | -0.537310000 |
| 6  | -1.339310000 | 1.516370000  | -0.044450000 |
| 7  | -1.129310000 | 2.819130000  | 0.400710000  |
| 6  | -0.269510000 | 0.550240000  | -0.061770000 |
| 6  | 1.021510000  | 1.019700000  | -0.079350000 |
| 6  | 2.207540000  | 0.208530000  | -0.072010000 |
| 7  | 3.553770000  | 1.102940000  | -0.068760000 |
| 1  | -4.199470000 | 3.080600000  | -0.674430000 |
| 1  | -3.129230000 | 0.641030000  | -0.997860000 |
| 1  | -0.310720000 | 3.127350000  | 0.901660000  |
| 1  | 1.208560000  | 2.081230000  | -0.157520000 |
| 8  | 2.371690000  | -0.970500000 | -0.086020000 |
| 8  | 3.439480000  | 2.298640000  | 0.172920000  |
| 8  | 4.582280000  | 0.508710000  | -0.288880000 |
| 17 | 0.165360000  | -2.124880000 | 1.741930000  |
| 17 | -2.674830000 | -1.689880000 | 0.209020000  |
| 17 | -0.040270000 | -2.291580000 | -1.663980000 |

**38**

|    |              |              |              |
|----|--------------|--------------|--------------|
| 14 | 1.248510000  | -1.397960000 | 0.071050000  |
| 17 | -5.078900000 | 0.989170000  | 0.320560000  |
| 6  | -3.663030000 | 0.106980000  | -0.087040000 |
| 6  | -3.538680000 | -1.152410000 | -0.647500000 |
| 6  | -2.162300000 | -1.428020000 | -0.701150000 |

|    |              |              |              |
|----|--------------|--------------|--------------|
| 6  | -1.459750000 | -0.327250000 | -0.193660000 |
| 7  | -2.429060000 | 0.612690000  | 0.162250000  |
| 6  | -0.056130000 | -0.009030000 | -0.132430000 |
| 6  | 0.305920000  | 1.316150000  | -0.151500000 |
| 6  | 1.652160000  | 1.813790000  | -0.078740000 |
| 7  | 1.705730000  | 3.427250000  | -0.101530000 |
| 1  | -4.350110000 | -1.782940000 | -0.970470000 |
| 1  | -1.719200000 | -2.318020000 | -1.111500000 |
| 1  | -2.257660000 | 1.469740000  | 0.665950000  |
| 1  | -0.445370000 | 2.081720000  | -0.284870000 |
| 8  | 2.705680000  | 1.261600000  | -0.025220000 |
| 8  | 0.652480000  | 4.030820000  | 0.063450000  |
| 8  | 2.798380000  | 3.916390000  | -0.262920000 |
| 17 | 2.269630000  | -1.160400000 | 1.833890000  |
| 17 | 0.363120000  | -3.258160000 | 0.231130000  |
| 17 | 2.483500000  | -1.497100000 | -1.560240000 |

### 39

|    |              |              |              |
|----|--------------|--------------|--------------|
| 14 | 1.100320000  | -1.465800000 | 0.078010000  |
| 6  | -3.670330000 | 0.447590000  | -0.012450000 |
| 6  | -3.632100000 | -0.776670000 | -0.678920000 |
| 6  | -2.291500000 | -1.158320000 | -0.781190000 |
| 6  | -1.502290000 | -0.150520000 | -0.199320000 |
| 7  | -2.375780000 | 0.819040000  | 0.246740000  |
| 6  | -0.065730000 | 0.040880000  | -0.136120000 |
| 6  | 0.399570000  | 1.326850000  | -0.169700000 |
| 6  | 1.789350000  | 1.716630000  | -0.104240000 |
| 7  | 1.972560000  | 3.315890000  | -0.095870000 |
| 1  | -4.498050000 | -1.310560000 | -1.035750000 |
| 1  | -1.917290000 | -2.046080000 | -1.260810000 |
| 1  | -2.108810000 | 1.623150000  | 0.795870000  |
| 1  | -0.289790000 | 2.148450000  | -0.307650000 |
| 8  | 2.789840000  | 1.075760000  | -0.074490000 |
| 8  | 0.979270000  | 3.990430000  | 0.145680000  |
| 8  | 3.089840000  | 3.721860000  | -0.306870000 |
| 17 | 2.167690000  | -1.293200000 | 1.819660000  |
| 17 | 0.019570000  | -3.209250000 | 0.280260000  |
| 17 | 2.298570000  | -1.702210000 | -1.564870000 |
| 6  | -4.804500000 | 1.267410000  | 0.406470000  |
| 8  | -5.962270000 | 0.981490000  | 0.194670000  |
| 1  | -4.535650000 | 2.201420000  | 0.945180000  |

### 40

|    |              |              |              |
|----|--------------|--------------|--------------|
| 14 | 1.457880000  | -1.396690000 | 0.115580000  |
| 6  | -3.458030000 | -0.047090000 | -0.167520000 |
| 6  | -3.285910000 | -1.244590000 | -0.840100000 |
| 6  | -1.901070000 | -1.456340000 | -0.902000000 |
| 6  | -1.257670000 | -0.372950000 | -0.283170000 |
| 7  | -2.247270000 | 0.483460000  | 0.149440000  |
| 6  | 0.150610000  | -0.021710000 | -0.174660000 |
| 6  | 0.471260000  | 1.303150000  | -0.228130000 |
| 6  | 1.818590000  | 1.833750000  | -0.148770000 |
| 7  | 1.849010000  | 3.437960000  | -0.160540000 |
| 1  | -4.074490000 | -1.868870000 | -1.225410000 |

|    |              |              |              |
|----|--------------|--------------|--------------|
| 1  | -1.410130000 | -2.286960000 | -1.378810000 |
| 1  | -2.142630000 | 1.315330000  | 0.715040000  |
| 1  | -0.298830000 | 2.045000000  | -0.393230000 |
| 8  | 2.871280000  | 1.285930000  | -0.098910000 |
| 8  | 0.790080000  | 4.012830000  | 0.052610000  |
| 8  | 2.926380000  | 3.945670000  | -0.358200000 |
| 17 | 2.472340000  | -1.061310000 | 1.862980000  |
| 17 | 0.531920000  | -3.220300000 | 0.367840000  |
| 17 | 2.697050000  | -1.577090000 | -1.502700000 |
| 7  | -4.657250000 | 0.621300000  | 0.238390000  |
| 8  | -5.724220000 | 0.114100000  | -0.081670000 |
| 8  | -4.519080000 | 1.664290000  | 0.881320000  |

#### 41

|   |              |              |              |
|---|--------------|--------------|--------------|
| 7 | -2.658170000 | 0.101020000  | -0.431700000 |
| 6 | -2.467940000 | 1.533260000  | -0.154290000 |
| 6 | -3.610610000 | 2.435630000  | -0.625460000 |
| 6 | -3.254990000 | 3.914790000  | -0.442220000 |
| 6 | -3.991290000 | -0.498500000 | -0.289200000 |
| 6 | -4.417010000 | -0.750680000 | 1.163930000  |
| 6 | -5.801470000 | -1.398810000 | 1.250510000  |
| 1 | -2.289630000 | 1.697160000  | 0.919230000  |
| 1 | -1.566470000 | 1.853600000  | -0.685440000 |
| 1 | -3.819820000 | 2.230870000  | -1.680380000 |
| 1 | -4.525510000 | 2.216190000  | -0.067850000 |
| 1 | -4.080660000 | 4.552910000  | -0.763940000 |
| 1 | -3.045220000 | 4.148480000  | 0.605680000  |
| 1 | -2.374280000 | 4.190640000  | -1.029210000 |
| 1 | -4.710100000 | 0.154870000  | -0.784920000 |
| 1 | -4.000830000 | -1.433100000 | -0.852440000 |
| 1 | -3.672340000 | -1.390440000 | 1.648350000  |
| 1 | -4.417720000 | 0.197980000  | 1.711910000  |
| 1 | -6.089860000 | -1.569130000 | 2.290130000  |
| 1 | -6.569010000 | -0.766700000 | 0.793390000  |
| 1 | -5.820200000 | -2.366190000 | 0.739420000  |
| 6 | -1.578170000 | -0.725530000 | -0.406460000 |
| 6 | -1.507630000 | -2.132080000 | -0.559620000 |
| 6 | -0.166700000 | -2.493830000 | -0.490250000 |
| 6 | 0.604350000  | -1.339160000 | -0.289350000 |
| 7 | -0.299070000 | -0.271900000 | -0.243260000 |
| 6 | 2.002780000  | -1.182890000 | -0.150390000 |
| 6 | 2.632590000  | 0.038610000  | 0.019440000  |
| 6 | 4.037310000  | 0.198170000  | 0.177490000  |
| 7 | 4.423860000  | 1.783450000  | 0.357000000  |
| 1 | -2.341240000 | -2.795640000 | -0.711400000 |
| 1 | 0.237590000  | -3.490120000 | -0.580020000 |
| 1 | -0.043970000 | 0.678770000  | -0.038610000 |
| 6 | 2.745300000  | -2.412880000 | -0.196290000 |
| 1 | 2.055300000  | 0.949480000  | 0.036420000  |
| 8 | 4.959980000  | -0.554510000 | 0.206790000  |
| 8 | 3.516910000  | 2.610700000  | 0.340090000  |
| 8 | 5.600080000  | 2.024240000  | 0.496900000  |
| 7 | 3.261830000  | -3.443950000 | -0.246000000 |

**42**

|   |              |              |              |
|---|--------------|--------------|--------------|
| 6 | -2.768090000 | 0.000210000  | -0.067950000 |
| 6 | -2.940620000 | 1.402100000  | -0.044150000 |
| 6 | -1.671420000 | 1.975190000  | -0.025330000 |
| 6 | -0.712580000 | 0.952100000  | -0.028920000 |
| 7 | -1.425540000 | -0.251110000 | -0.050980000 |
| 6 | 0.701400000  | 1.022190000  | -0.007320000 |
| 6 | 1.531470000  | -0.083990000 | -0.016100000 |
| 6 | 2.954010000  | -0.014880000 | 0.010700000  |
| 7 | 3.609730000  | -1.517530000 | -0.006630000 |
| 7 | -3.697860000 | -0.989690000 | -0.124280000 |
| 1 | -3.882530000 | 1.923230000  | -0.039100000 |
| 1 | -1.439950000 | 3.028790000  | -0.007260000 |
| 1 | -1.006640000 | -1.165510000 | -0.042240000 |
| 6 | 1.228770000  | 2.359020000  | 0.026520000  |
| 1 | 1.113530000  | -1.077900000 | -0.044820000 |
| 8 | 3.737730000  | 0.880820000  | 0.042300000  |
| 6 | -3.292850000 | -2.374210000 | 0.083110000  |
| 6 | -5.098330000 | -0.639880000 | 0.089680000  |
| 1 | -4.139370000 | -3.024550000 | -0.131370000 |
| 1 | -2.491670000 | -2.650510000 | -0.608160000 |
| 1 | -2.960320000 | -2.565840000 | 1.112310000  |
| 1 | -5.722750000 | -1.469110000 | -0.241520000 |
| 1 | -5.318100000 | -0.429250000 | 1.144010000  |
| 1 | -5.360630000 | 0.234760000  | -0.506260000 |
| 8 | 2.851600000  | -2.482570000 | -0.030770000 |
| 8 | 4.817280000  | -1.563400000 | 0.006740000  |
| 7 | 1.565820000  | 3.462600000  | 0.052860000  |

**43**

|   |              |              |              |
|---|--------------|--------------|--------------|
| 6 | 3.295780000  | -0.907020000 | -0.003630000 |
| 6 | 3.745740000  | 0.420400000  | 0.034570000  |
| 6 | 2.613080000  | 1.237880000  | 0.032060000  |
| 6 | 1.473160000  | 0.424680000  | -0.003670000 |
| 7 | 1.935670000  | -0.896110000 | -0.018860000 |
| 6 | 0.097790000  | 0.774590000  | -0.001610000 |
| 6 | -0.933270000 | -0.142370000 | 0.005480000  |
| 6 | -2.316490000 | 0.211290000  | -0.006250000 |
| 7 | -3.260670000 | -1.125590000 | 0.009510000  |
| 7 | 4.012680000  | -2.070270000 | -0.085190000 |
| 1 | 4.777740000  | 0.731270000  | 0.065420000  |
| 1 | 2.593660000  | 2.315920000  | 0.067290000  |
| 1 | 1.355250000  | -1.711210000 | -0.137280000 |
| 6 | -0.153380000 | 2.190160000  | -0.006980000 |
| 1 | -0.722430000 | -1.200050000 | 0.024650000  |
| 8 | -2.899910000 | 1.247900000  | -0.024750000 |
| 8 | -2.710310000 | -2.222060000 | 0.025650000  |
| 8 | -4.452250000 | -0.926550000 | 0.003880000  |
| 7 | -0.263970000 | 3.338900000  | -0.008750000 |
| 1 | 3.593720000  | -2.918300000 | 0.266940000  |
| 1 | 5.001390000  | -1.998190000 | 0.097940000  |

**44**

|   |              |              |              |
|---|--------------|--------------|--------------|
| 6 | -3.296700000 | -0.920090000 | 0.000060000  |
| 6 | -3.759140000 | 0.394050000  | 0.000110000  |
| 6 | -2.619150000 | 1.211950000  | 0.000050000  |
| 6 | -1.483450000 | 0.395590000  | -0.000020000 |
| 7 | -1.943600000 | -0.921860000 | 0.000000000  |
| 6 | -0.103570000 | 0.752280000  | -0.000060000 |
| 6 | 0.928770000  | -0.155920000 | -0.000060000 |
| 6 | 2.313400000  | 0.214230000  | 0.000040000  |
| 7 | 3.275440000  | -1.103560000 | -0.000010000 |
| 1 | -4.791380000 | 0.706050000  | 0.000160000  |
| 1 | -2.598870000 | 2.290480000  | 0.000050000  |
| 1 | -1.384020000 | -1.760640000 | 0.000030000  |
| 1 | 0.726810000  | -1.215740000 | -0.000150000 |
| 8 | 2.875720000  | 1.261170000  | -0.000220000 |
| 8 | 2.738220000  | -2.205450000 | -0.000680000 |
| 8 | 4.463400000  | -0.885630000 | 0.000820000  |
| 6 | 0.138670000  | 2.169580000  | -0.000060000 |
| 7 | 0.239570000  | 3.319080000  | -0.000080000 |
| 8 | -3.925460000 | -2.103970000 | 0.000080000  |
| 1 | -4.880490000 | -1.974880000 | 0.000250000  |

**45**

|   |              |              |              |
|---|--------------|--------------|--------------|
| 6 | -3.426980000 | -1.646260000 | -0.000060000 |
| 6 | -4.072400000 | -0.418390000 | 0.000060000  |
| 6 | -3.077960000 | 0.573470000  | 0.000000000  |
| 6 | -1.832970000 | -0.065430000 | 0.000010000  |
| 7 | -2.084100000 | -1.427410000 | 0.000040000  |
| 6 | -0.516630000 | 0.504030000  | 0.000010000  |
| 6 | 0.638760000  | -0.232990000 | 0.000010000  |
| 6 | 1.955480000  | 0.346440000  | 0.000030000  |
| 7 | 3.108480000  | -0.804620000 | 0.000040000  |
| 1 | -5.139840000 | -0.268120000 | 0.000100000  |
| 1 | -3.221740000 | 1.642480000  | 0.000010000  |
| 1 | -1.386680000 | -2.154280000 | 0.000070000  |
| 1 | 0.603160000  | -1.311330000 | 0.000020000  |
| 8 | 2.345070000  | 1.467520000  | 0.000000000  |
| 8 | 2.744960000  | -1.975000000 | 0.000000000  |
| 8 | 4.247530000  | -0.404950000 | -0.000170000 |
| 6 | -0.492740000 | 1.941160000  | 0.000020000  |
| 7 | -0.563750000 | 3.092920000  | 0.000020000  |
| 1 | -3.827210000 | -2.647690000 | -0.000100000 |

**46**

|    |              |              |              |
|----|--------------|--------------|--------------|
| 6  | -3.068330000 | -0.323720000 | 0.000040000  |
| 6  | -3.347960000 | 1.033140000  | 0.000330000  |
| 6  | -2.107740000 | 1.692110000  | 0.000440000  |
| 6  | -1.095180000 | 0.728210000  | 0.000050000  |
| 7  | -1.721640000 | -0.510490000 | 0.000070000  |
| 6  | 0.327810000  | 0.901430000  | 0.000000000  |
| 6  | 1.227780000  | -0.131860000 | 0.000170000  |
| 6  | 2.654570000  | 0.054820000  | 0.000040000  |
| 7  | 3.438450000  | -1.371460000 | 0.000050000  |
| 17 | -4.142500000 | -1.661550000 | -0.000240000 |

|   |              |              |              |
|---|--------------|--------------|--------------|
| 1 | -4.331150000 | 1.472930000  | 0.000500000  |
| 1 | -1.943010000 | 2.758190000  | 0.000710000  |
| 1 | -1.274020000 | -1.413860000 | -0.000530000 |
| 1 | 0.890540000  | -1.156840000 | 0.000400000  |
| 8 | 3.341090000  | 1.023040000  | -0.000150000 |
| 8 | 2.761150000  | -2.392770000 | 0.000020000  |
| 8 | 4.643830000  | -1.306880000 | 0.000110000  |
| 6 | 0.753110000  | 2.274150000  | -0.000190000 |
| 7 | 1.004230000  | 3.400390000  | -0.000430000 |

#### 47

|   |              |              |              |
|---|--------------|--------------|--------------|
| 6 | 3.085340000  | -0.454150000 | -0.000010000 |
| 6 | 3.375180000  | 0.910480000  | 0.000020000  |
| 6 | 2.157890000  | 1.596380000  | 0.000050000  |
| 6 | 1.126130000  | 0.643880000  | 0.000020000  |
| 7 | 1.719810000  | -0.594860000 | -0.000010000 |
| 6 | -0.300040000 | 0.853670000  | 0.000050000  |
| 6 | -1.217990000 | -0.158770000 | 0.000170000  |
| 6 | -2.646130000 | 0.056740000  | 0.000170000  |
| 7 | -3.459370000 | -1.348700000 | 0.000040000  |
| 1 | 4.369450000  | 1.326920000  | 0.000040000  |
| 1 | 2.008950000  | 2.664770000  | 0.000090000  |
| 1 | 1.238820000  | -1.481650000 | -0.000140000 |
| 1 | -0.903390000 | -1.191070000 | 0.000270000  |
| 8 | -3.305860000 | 1.041780000  | -0.000030000 |
| 8 | -2.800970000 | -2.382050000 | -0.000120000 |
| 8 | -4.662310000 | -1.257950000 | -0.000040000 |
| 6 | -0.695750000 | 2.234290000  | -0.000050000 |
| 7 | -0.927170000 | 3.364720000  | -0.000130000 |
| 6 | 3.976530000  | -1.614260000 | -0.000060000 |
| 8 | 5.184200000  | -1.536250000 | -0.000010000 |
| 1 | 3.465800000  | -2.600920000 | -0.000030000 |

#### 48

|   |              |              |              |
|---|--------------|--------------|--------------|
| 6 | 2.860220000  | -0.061350000 | 0.000030000  |
| 6 | 3.071520000  | 1.306870000  | 0.000400000  |
| 6 | 1.796420000  | 1.890510000  | 0.000450000  |
| 6 | 0.844320000  | 0.860900000  | -0.000020000 |
| 7 | 1.527560000  | -0.331020000 | -0.000090000 |
| 6 | -0.598120000 | 0.961670000  | -0.000210000 |
| 6 | -1.432590000 | -0.116400000 | -0.000380000 |
| 6 | -2.877560000 | -0.002820000 | -0.000610000 |
| 7 | -3.593080000 | -1.454770000 | 0.000080000  |
| 7 | 3.801660000  | -1.144450000 | -0.000210000 |
| 1 | 4.031530000  | 1.795020000  | 0.000630000  |
| 1 | 1.566430000  | 2.944230000  | 0.000720000  |
| 1 | 1.163440000  | -1.274140000 | -0.000420000 |
| 6 | -1.093280000 | 2.309480000  | -0.000160000 |
| 1 | -1.041110000 | -1.122380000 | -0.000340000 |
| 8 | -3.596600000 | 0.938940000  | -0.000160000 |
| 8 | 3.330680000  | -2.283030000 | -0.000360000 |
| 8 | 4.990440000  | -0.858840000 | 0.000240000  |
| 8 | -2.863690000 | -2.438070000 | 0.000230000  |
| 8 | -4.799250000 | -1.444030000 | 0.000620000  |



|   |              |             |              |
|---|--------------|-------------|--------------|
| 7 | -1.398780000 | 3.422280000 | -0.000100000 |
|---|--------------|-------------|--------------|

**49**

|    |              |              |              |
|----|--------------|--------------|--------------|
| 7  | -3.451540000 | -0.101940000 | -0.575320000 |
| 6  | -4.669730000 | -0.916730000 | -0.518430000 |
| 6  | -3.550600000 | 1.325750000  | -0.896960000 |
| 6  | -2.258210000 | -0.667770000 | -0.278050000 |
| 6  | -1.957040000 | -1.986550000 | 0.138620000  |
| 6  | -0.574430000 | -2.093980000 | 0.221780000  |
| 6  | 0.009290000  | -0.855340000 | -0.108510000 |
| 7  | -1.075200000 | 0.002190000  | -0.379310000 |
| 1  | -4.415920000 | -1.931630000 | -0.836000000 |
| 6  | -5.362940000 | -0.954230000 | 0.851210000  |
| 1  | -5.358630000 | -0.523160000 | -1.271550000 |
| 1  | -4.504320000 | 1.470270000  | -1.409210000 |
| 6  | -3.462180000 | 2.275470000  | 0.309080000  |
| 1  | -2.779630000 | 1.584270000  | -1.634670000 |
| 1  | -2.671740000 | -2.759540000 | 0.363930000  |
| 1  | -0.040250000 | -2.966030000 | 0.551700000  |
| 1  | -0.965880000 | 0.905520000  | -0.811000000 |
| 6  | 1.323790000  | -0.324260000 | -0.060700000 |
| 6  | 1.503830000  | 1.046260000  | 0.053950000  |
| 6  | 2.714040000  | 1.797530000  | 0.046780000  |
| 7  | 2.375040000  | 3.406730000  | 0.149540000  |
| 1  | 0.628600000  | 1.653770000  | 0.226360000  |
| 8  | 3.873590000  | 1.536180000  | 0.013850000  |
| 8  | 1.204780000  | 3.769740000  | 0.058030000  |
| 8  | 3.330090000  | 4.131660000  | 0.297170000  |
| 15 | 2.826020000  | -1.361050000 | -0.361380000 |
| 17 | 3.824670000  | -1.357350000 | 1.436060000  |
| 17 | 2.267860000  | -3.350980000 | -0.493300000 |
| 8  | 3.600320000  | -0.968460000 | -1.548150000 |
| 6  | -6.593420000 | -1.865380000 | 0.837490000  |
| 1  | -4.648540000 | -1.297040000 | 1.606330000  |
| 1  | -5.656370000 | 0.060500000  | 1.137960000  |
| 6  | -3.521770000 | 3.743970000  | -0.120120000 |
| 1  | -4.281620000 | 2.050550000  | 0.998050000  |
| 1  | -2.536040000 | 2.087420000  | 0.860530000  |
| 1  | -7.080810000 | -1.879120000 | 1.814770000  |
| 1  | -7.332150000 | -1.527920000 | 0.104020000  |
| 1  | -6.324070000 | -2.896040000 | 0.587200000  |
| 1  | -3.467970000 | 4.404400000  | 0.747690000  |
| 1  | -2.688180000 | 4.002740000  | -0.779550000 |
| 1  | -4.452130000 | 3.967870000  | -0.651230000 |

**50**

|   |              |              |              |
|---|--------------|--------------|--------------|
| 7 | -4.373240000 | 0.520480000  | -0.146110000 |
| 6 | -5.630540000 | -0.070950000 | 0.299030000  |
| 6 | -4.325710000 | 1.962410000  | -0.362400000 |
| 6 | -3.220500000 | -0.162530000 | 0.076020000  |
| 6 | -3.021320000 | -1.486910000 | 0.520840000  |
| 6 | -1.652540000 | -1.737440000 | 0.482650000  |
| 6 | -0.981860000 | -0.579830000 | 0.048980000  |
| 7 | -1.991390000 | 0.378230000  | -0.159540000 |

|    |              |              |              |
|----|--------------|--------------|--------------|
| 1  | -5.667430000 | -1.123960000 | 0.018830000  |
| 1  | -5.768510000 | 0.012510000  | 1.384640000  |
| 1  | -6.455380000 | 0.436830000  | -0.200180000 |
| 1  | -5.327930000 | 2.315430000  | -0.599000000 |
| 1  | -3.963590000 | 2.504370000  | 0.520690000  |
| 1  | -3.687390000 | 2.209190000  | -1.215760000 |
| 1  | -3.787910000 | -2.172620000 | 0.838880000  |
| 1  | -1.180550000 | -2.649420000 | 0.800730000  |
| 1  | -1.831400000 | 1.257540000  | -0.623960000 |
| 6  | 0.383870000  | -0.191390000 | -0.020430000 |
| 6  | 0.720830000  | 1.148290000  | 0.053870000  |
| 6  | 2.014710000  | 1.749810000  | -0.006530000 |
| 7  | 1.878600000  | 3.386220000  | 0.033400000  |
| 1  | -0.069480000 | 1.857170000  | 0.250100000  |
| 8  | 3.130410000  | 1.341670000  | -0.038980000 |
| 8  | 0.760050000  | 3.882790000  | -0.066630000 |
| 8  | 2.916680000  | 3.993560000  | 0.146000000  |
| 15 | 1.736290000  | -1.395210000 | -0.408320000 |
| 17 | 2.776630000  | -1.586310000 | 1.354420000  |
| 17 | 0.914820000  | -3.283940000 | -0.600370000 |
| 8  | 2.520480000  | -1.056520000 | -1.604810000 |

## 51

|    |              |              |              |
|----|--------------|--------------|--------------|
| 7  | -3.797650000 | 3.053820000  | 0.669530000  |
| 6  | -3.201060000 | 1.924020000  | 0.178890000  |
| 6  | -3.770420000 | 0.809790000  | -0.451310000 |
| 6  | -2.752330000 | -0.127690000 | -0.632590000 |
| 6  | -1.548080000 | 0.401710000  | -0.138810000 |
| 7  | -1.873630000 | 1.687920000  | 0.334400000  |
| 6  | -0.183300000 | 0.000400000  | -0.200230000 |
| 6  | 0.806430000  | 0.963780000  | -0.195260000 |
| 6  | 2.224270000  | 0.787390000  | -0.124140000 |
| 7  | 2.983200000  | 2.238900000  | -0.161380000 |
| 1  | -4.803470000 | 0.712200000  | -0.744720000 |
| 1  | -2.859580000 | -1.072210000 | -1.134390000 |
| 1  | -1.259910000 | 2.241070000  | 0.913240000  |
| 1  | 0.503550000  | 1.996820000  | -0.280450000 |
| 8  | 2.945360000  | -0.153680000 | -0.044940000 |
| 8  | 2.301290000  | 3.255420000  | -0.071460000 |
| 8  | 4.186170000  | 2.194890000  | -0.256440000 |
| 15 | 0.326480000  | -1.781580000 | -0.310760000 |
| 17 | 1.150860000  | -2.157910000 | 1.536750000  |
| 17 | -1.367440000 | -2.962530000 | -0.174970000 |
| 8  | 1.138540000  | -2.125920000 | -1.486450000 |
| 1  | -3.248120000 | 3.899170000  | 0.720860000  |
| 1  | -4.755060000 | 3.207440000  | 0.393600000  |

## 52

|   |              |              |              |
|---|--------------|--------------|--------------|
| 8 | -3.707530000 | 3.194310000  | -0.148510000 |
| 6 | -3.175980000 | 1.988640000  | 0.103370000  |
| 6 | -3.712000000 | 0.807580000  | 0.606280000  |
| 6 | -2.677420000 | -0.140980000 | 0.576290000  |
| 6 | -1.518880000 | 0.465920000  | 0.076870000  |
| 7 | -1.869260000 | 1.798670000  | -0.184470000 |

|    |              |              |              |
|----|--------------|--------------|--------------|
| 6  | -0.152520000 | 0.044350000  | -0.008810000 |
| 6  | 0.856570000  | 0.971220000  | 0.066370000  |
| 6  | 2.278220000  | 0.742650000  | 0.046100000  |
| 7  | 3.086700000  | 2.154490000  | -0.042790000 |
| 1  | -4.723040000 | 0.659620000  | 0.950880000  |
| 1  | -2.748830000 | -1.152240000 | 0.935900000  |
| 1  | -1.301620000 | 2.472540000  | -0.677050000 |
| 1  | 0.588390000  | 2.004720000  | 0.233060000  |
| 8  | 2.954180000  | -0.228120000 | 0.130520000  |
| 8  | 2.440720000  | 3.168630000  | -0.281370000 |
| 8  | 4.281130000  | 2.086060000  | 0.120160000  |
| 15 | 0.302270000  | -1.713470000 | -0.399530000 |
| 17 | 0.893140000  | -2.494670000 | 1.405600000  |
| 17 | -1.438440000 | -2.758970000 | -0.764110000 |
| 8  | 1.239250000  | -1.859500000 | -1.522290000 |
| 1  | -4.650730000 | 3.189810000  | 0.048680000  |

### 53

|    |              |              |              |
|----|--------------|--------------|--------------|
| 1  | -2.191580000 | 4.449000000  | -0.144290000 |
| 6  | -2.147630000 | 3.393350000  | 0.071060000  |
| 6  | -3.102400000 | 2.539930000  | 0.598330000  |
| 6  | -2.550300000 | 1.245770000  | 0.604470000  |
| 6  | -1.250550000 | 1.327400000  | 0.098160000  |
| 7  | -1.031570000 | 2.665130000  | -0.204890000 |
| 6  | -0.185010000 | 0.357570000  | 0.022120000  |
| 6  | 1.114240000  | 0.750770000  | 0.143630000  |
| 6  | 2.303290000  | -0.078860000 | 0.205740000  |
| 7  | 3.632590000  | 0.797090000  | -0.107650000 |
| 1  | -4.085670000 | 2.823740000  | 0.937230000  |
| 1  | -3.023030000 | 0.353530000  | 0.979300000  |
| 1  | -0.221420000 | 3.018070000  | -0.690720000 |
| 1  | 1.316580000  | 1.803140000  | 0.293080000  |
| 8  | 2.482940000  | -1.209930000 | 0.501440000  |
| 8  | 3.464650000  | 1.925220000  | -0.555510000 |
| 8  | 4.689010000  | 0.255890000  | 0.110300000  |
| 15 | -0.549740000 | -1.420170000 | -0.368000000 |
| 17 | -0.805290000 | -2.278340000 | 1.481170000  |
| 17 | -2.447290000 | -1.472390000 | -1.158860000 |
| 8  | 0.419410000  | -2.075370000 | -1.257150000 |

### 54

|    |              |              |              |
|----|--------------|--------------|--------------|
| 17 | -4.672990000 | 1.700620000  | -0.100540000 |
| 6  | -3.395590000 | 0.588480000  | 0.184680000  |
| 6  | -3.440120000 | -0.701020000 | 0.681950000  |
| 6  | -2.120180000 | -1.187750000 | 0.646750000  |
| 6  | -1.289520000 | -0.183840000 | 0.145770000  |
| 7  | -2.109510000 | 0.911160000  | -0.115040000 |
| 6  | 0.145400000  | -0.080840000 | 0.043270000  |
| 6  | 0.759250000  | 1.130090000  | 0.164350000  |
| 6  | 2.181680000  | 1.416540000  | 0.203510000  |
| 7  | 2.461270000  | 2.984070000  | -0.099490000 |
| 1  | -4.321860000 | -1.215250000 | 1.026050000  |
| 1  | -1.796760000 | -2.153800000 | 0.996260000  |
| 1  | -1.832240000 | 1.749750000  | -0.603310000 |

|    |              |              |              |
|----|--------------|--------------|--------------|
| 1  | 0.141300000  | 2.002250000  | 0.332960000  |
| 8  | 3.127660000  | 0.760870000  | 0.476370000  |
| 8  | 1.520920000  | 3.645950000  | -0.522440000 |
| 8  | 3.586430000  | 3.371350000  | 0.100950000  |
| 15 | 1.170260000  | -1.568440000 | -0.384530000 |
| 17 | 1.646710000  | -2.368920000 | 1.445770000  |
| 17 | -0.120750000 | -2.964660000 | -1.168960000 |
| 8  | 2.295890000  | -1.309730000 | -1.292430000 |

## 55

|    |              |              |              |
|----|--------------|--------------|--------------|
| 6  | 4.339080000  | 1.945010000  | 0.152010000  |
| 6  | 3.343710000  | 0.918680000  | -0.139520000 |
| 6  | 3.490530000  | -0.380770000 | -0.617950000 |
| 6  | 2.215880000  | -0.959540000 | -0.672830000 |
| 6  | 1.291080000  | -0.000610000 | -0.244760000 |
| 7  | 2.000290000  | 1.135760000  | 0.063070000  |
| 6  | -0.161820000 | -0.027220000 | -0.186700000 |
| 6  | -0.878790000 | 1.095840000  | -0.419690000 |
| 6  | -2.335760000 | 1.269030000  | -0.471360000 |
| 7  | -2.756220000 | 2.687990000  | 0.174200000  |
| 1  | 4.430250000  | -0.832980000 | -0.891370000 |
| 1  | 1.975090000  | -1.952370000 | -1.016620000 |
| 1  | 1.611580000  | 1.952960000  | 0.511820000  |
| 1  | -0.339350000 | 2.006620000  | -0.656050000 |
| 8  | -3.192950000 | 0.625550000  | -0.960250000 |
| 8  | -1.869410000 | 3.292830000  | 0.764440000  |
| 8  | -3.904600000 | 3.027340000  | 0.035620000  |
| 15 | -1.033270000 | -1.570300000 | 0.336000000  |
| 17 | -0.993060000 | -2.746820000 | -1.346990000 |
| 17 | 0.272340000  | -2.517960000 | 1.602540000  |
| 8  | -2.362300000 | -1.366700000 | 0.929650000  |
| 8  | 5.531160000  | 1.802640000  | -0.011200000 |
| 1  | 3.926660000  | 2.899440000  | 0.545510000  |

## 56

|    |              |              |              |
|----|--------------|--------------|--------------|
| 7  | -4.448080000 | -1.012690000 | 0.129230000  |
| 6  | -3.322330000 | -0.183710000 | -0.166860000 |
| 6  | -3.255970000 | 1.157450000  | -0.492460000 |
| 6  | -1.889190000 | 1.455460000  | -0.641260000 |
| 6  | -1.162680000 | 0.284470000  | -0.413340000 |
| 7  | -2.064890000 | -0.709960000 | -0.126710000 |
| 6  | 0.267500000  | 0.001270000  | -0.460420000 |
| 6  | 0.762530000  | -1.171030000 | -0.895110000 |
| 6  | 2.186200000  | -1.615550000 | -0.956170000 |
| 7  | 2.719350000  | -2.216360000 | 0.424590000  |
| 1  | -4.098200000 | 1.818680000  | -0.608770000 |
| 1  | -1.472500000 | 2.409660000  | -0.916920000 |
| 1  | -1.869500000 | -1.649420000 | 0.192510000  |
| 1  | 0.087970000  | -1.904480000 | -1.331390000 |
| 8  | 2.855940000  | -1.744830000 | -1.916520000 |
| 8  | 1.874400000  | -2.336640000 | 1.300650000  |
| 8  | 3.877590000  | -2.539540000 | 0.465200000  |
| 15 | 1.500040000  | 1.185480000  | 0.176430000  |
| 17 | 1.349790000  | 2.861510000  | -0.993530000 |

|    |              |              |             |
|----|--------------|--------------|-------------|
| 17 | 0.788880000  | 1.803240000  | 1.984910000 |
| 8  | 2.853130000  | 0.593370000  | 0.198140000 |
| 8  | -4.209470000 | -2.188580000 | 0.417950000 |
| 8  | -5.559940000 | -0.503090000 | 0.075680000 |

**57**

|   |              |              |              |
|---|--------------|--------------|--------------|
| 6 | -1.975540000 | -3.072830000 | 0.386870000  |
| 7 | -1.664480000 | -4.172860000 | 0.519040000  |
| 6 | -3.558830000 | -1.763490000 | -0.777030000 |
| 7 | -4.324460000 | -1.905080000 | -1.624320000 |
| 6 | 2.147820000  | -0.450030000 | -0.558970000 |
| 6 | 1.992420000  | -1.848530000 | -0.728350000 |
| 6 | 0.648190000  | -2.145120000 | -0.563540000 |
| 6 | -0.063240000 | -0.953630000 | -0.299120000 |
| 7 | 0.907830000  | 0.069010000  | -0.332900000 |
| 6 | -1.425390000 | -0.610100000 | -0.154380000 |
| 6 | -1.837650000 | 0.704150000  | -0.318020000 |
| 6 | -3.133910000 | 1.235790000  | -0.092840000 |
| 7 | -3.168080000 | 2.836670000  | -0.380790000 |
| 1 | 2.775790000  | -2.552470000 | -0.951110000 |
| 1 | 0.222400000  | -3.125660000 | -0.673670000 |
| 1 | 0.735520000  | 0.999020000  | 0.011110000  |
| 1 | -1.123680000 | 1.422530000  | -0.686810000 |
| 8 | -4.175230000 | 0.758800000  | 0.251830000  |
| 8 | -4.257090000 | 3.355760000  | -0.324530000 |
| 8 | -2.107010000 | 3.407740000  | -0.616850000 |
| 6 | -2.489910000 | -1.688600000 | 0.248320000  |
| 6 | -3.026230000 | -1.356890000 | 1.593090000  |
| 7 | -3.349590000 | -1.177110000 | 2.682940000  |
| 7 | 3.265860000  | 0.306850000  | -0.604280000 |
| 6 | 3.195280000  | 1.764850000  | -0.457960000 |
| 6 | 4.571110000  | -0.343810000 | -0.777410000 |
| 1 | 2.310650000  | 2.125460000  | -0.995400000 |
| 6 | 3.183030000  | 2.283280000  | 0.990150000  |
| 1 | 4.055100000  | 2.182590000  | -0.987280000 |
| 1 | 5.238470000  | 0.394680000  | -1.228600000 |
| 6 | 5.194420000  | -0.892060000 | 0.513960000  |
| 1 | 4.462980000  | -1.148220000 | -1.510960000 |
| 6 | 3.052520000  | 3.808020000  | 1.043940000  |
| 1 | 2.361210000  | 1.818860000  | 1.546220000  |
| 1 | 4.103130000  | 1.967640000  | 1.490670000  |
| 6 | 6.525570000  | -1.599180000 | 0.245310000  |
| 1 | 5.345200000  | -0.069920000 | 1.220260000  |
| 1 | 4.490820000  | -1.584200000 | 0.986810000  |
| 1 | 3.052350000  | 4.162210000  | 2.076790000  |
| 1 | 3.883010000  | 4.296940000  | 0.525900000  |
| 1 | 2.123010000  | 4.147830000  | 0.577670000  |
| 1 | 6.959910000  | -1.978450000 | 1.172750000  |
| 1 | 6.396400000  | -2.449450000 | -0.431290000 |
| 1 | 7.254730000  | -0.921070000 | -0.208670000 |

**58**

|   |              |              |             |
|---|--------------|--------------|-------------|
| 6 | -0.802680000 | -2.985950000 | 0.139250000 |
|---|--------------|--------------|-------------|

|   |              |              |              |
|---|--------------|--------------|--------------|
| 7 | -0.402080000 | -4.063330000 | 0.194300000  |
| 6 | -2.393210000 | -1.697630000 | -1.040980000 |
| 7 | -3.065270000 | -1.810370000 | -1.968220000 |
| 6 | 3.126820000  | 0.037690000  | -0.148580000 |
| 6 | 3.111150000  | -1.332030000 | -0.498450000 |
| 6 | 1.787060000  | -1.749550000 | -0.494060000 |
| 6 | 0.957330000  | -0.660000000 | -0.154060000 |
| 7 | 1.834050000  | 0.428380000  | 0.029920000  |
| 6 | -0.439690000 | -0.442980000 | -0.101810000 |
| 6 | -0.950420000 | 0.842360000  | -0.167450000 |
| 6 | -2.307350000 | 1.239820000  | -0.020710000 |
| 7 | -2.464790000 | 2.851590000  | -0.150880000 |
| 1 | 3.968650000  | -1.939780000 | -0.731170000 |
| 1 | 1.458240000  | -2.737800000 | -0.759060000 |
| 1 | 1.553650000  | 1.294950000  | 0.459260000  |
| 1 | -0.273710000 | 1.651670000  | -0.389230000 |
| 8 | -3.324980000 | 0.641340000  | 0.166760000  |
| 8 | -3.598240000 | 3.267920000  | -0.158590000 |
| 8 | -1.443820000 | 3.529620000  | -0.217310000 |
| 6 | -1.431380000 | -1.643650000 | 0.086380000  |
| 6 | -2.113690000 | -1.503140000 | 1.398010000  |
| 7 | -2.549590000 | -1.467890000 | 2.462630000  |
| 7 | 4.174020000  | 0.884950000  | -0.006380000 |
| 6 | 3.956270000  | 2.233420000  | 0.503910000  |
| 6 | 5.527140000  | 0.337700000  | 0.031250000  |
| 1 | 3.159120000  | 2.730080000  | -0.055240000 |
| 1 | 4.865300000  | 2.815270000  | 0.360330000  |
| 1 | 6.236730000  | 1.142770000  | -0.157090000 |
| 1 | 5.652790000  | -0.408570000 | -0.753200000 |
| 1 | 3.706480000  | 2.242290000  | 1.573360000  |
| 1 | 5.760640000  | -0.121580000 | 0.999420000  |

## 59

|   |              |              |              |
|---|--------------|--------------|--------------|
| 6 | -0.812890000 | 2.715720000  | 0.112180000  |
| 7 | -1.587550000 | 3.564680000  | 0.169380000  |
| 6 | 1.097480000  | 2.067280000  | -1.125160000 |
| 7 | 1.645390000  | 2.381600000  | -2.086950000 |
| 6 | -3.362820000 | -1.512010000 | 0.031050000  |
| 6 | -3.843810000 | -0.275900000 | -0.424850000 |
| 6 | -2.758890000 | 0.596940000  | -0.476250000 |
| 6 | -1.597650000 | -0.090300000 | -0.073050000 |
| 7 | -2.021850000 | -1.404560000 | 0.207960000  |
| 6 | -0.211930000 | 0.215920000  | -0.062290000 |
| 6 | 0.725660000  | -0.795880000 | -0.106840000 |
| 6 | 2.142360000  | -0.663650000 | -0.016220000 |
| 7 | 2.876870000  | -2.107750000 | -0.095010000 |
| 1 | -4.865440000 | -0.056600000 | -0.690780000 |
| 1 | -2.803640000 | 1.611520000  | -0.828790000 |
| 1 | -1.461360000 | -2.076350000 | 0.710160000  |
| 1 | 0.382460000  | -1.805320000 | -0.268060000 |
| 8 | 2.870560000  | 0.276260000  | 0.092070000  |
| 8 | 4.082660000  | -2.079060000 | -0.146060000 |
| 8 | 2.173260000  | -3.112600000 | -0.085040000 |
| 6 | 0.270900000  | 1.705170000  | 0.050950000  |

|   |              |              |             |
|---|--------------|--------------|-------------|
| 6 | 1.009090000  | 1.877420000  | 1.327670000 |
| 7 | 1.473070000  | 2.047410000  | 2.367040000 |
| 7 | -4.047250000 | -2.648560000 | 0.349070000 |
| 1 | -5.014830000 | -2.689920000 | 0.070380000 |
| 1 | -3.564760000 | -3.534090000 | 0.315730000 |

**60**

|   |              |              |              |
|---|--------------|--------------|--------------|
| 6 | -0.868120000 | 2.678260000  | 0.148500000  |
| 7 | -1.663210000 | 3.505970000  | 0.230890000  |
| 6 | 1.036790000  | 2.084320000  | -1.129980000 |
| 7 | 1.564190000  | 2.411740000  | -2.098860000 |
| 8 | -3.932980000 | -2.709770000 | 0.347980000  |
| 6 | -3.346040000 | -1.548000000 | 0.037110000  |
| 6 | -3.840140000 | -0.344800000 | -0.461930000 |
| 6 | -2.753350000 | 0.535890000  | -0.522760000 |
| 6 | -1.600020000 | -0.131990000 | -0.077280000 |
| 7 | -2.016600000 | -1.434410000 | 0.239850000  |
| 6 | -0.211800000 | 0.195970000  | -0.058130000 |
| 6 | 0.735960000  | -0.797850000 | -0.103230000 |
| 6 | 2.157370000  | -0.637910000 | -0.029060000 |
| 7 | 2.922370000  | -2.061580000 | -0.093950000 |
| 1 | -4.859950000 | -0.139990000 | -0.746060000 |
| 1 | -2.798310000 | 1.541020000  | -0.901690000 |
| 1 | -1.463570000 | -2.133120000 | 0.713910000  |
| 1 | 0.408930000  | -1.814990000 | -0.252920000 |
| 8 | 2.859690000  | 0.321790000  | 0.054750000  |
| 8 | 4.126070000  | -2.005140000 | -0.161510000 |
| 8 | 2.238780000  | -3.078010000 | -0.058030000 |
| 6 | 0.239860000  | 1.696440000  | 0.057830000  |
| 6 | 0.996100000  | 1.878200000  | 1.322340000  |
| 7 | 1.476830000  | 2.052670000  | 2.353330000  |
| 1 | -4.884290000 | -2.655720000 | 0.202050000  |

**61**

|   |              |              |              |
|---|--------------|--------------|--------------|
| 6 | 1.889080000  | -1.987270000 | 0.168100000  |
| 7 | 2.917650000  | -2.492350000 | 0.271890000  |
| 6 | -0.072870000 | -2.052680000 | -1.167910000 |
| 7 | -0.440880000 | -2.514200000 | -2.155640000 |
| 1 | 3.049820000  | 3.793430000  | 0.553910000  |
| 6 | 2.848880000  | 2.785680000  | 0.226580000  |
| 6 | 3.676100000  | 1.854520000  | -0.382910000 |
| 6 | 2.936860000  | 0.671120000  | -0.532170000 |
| 6 | 1.647760000  | 0.896240000  | -0.024900000 |
| 7 | 1.631750000  | 2.216700000  | 0.415130000  |
| 6 | 0.437090000  | 0.123580000  | -0.035710000 |
| 6 | -0.776030000 | 0.753090000  | -0.086310000 |
| 6 | -2.075000000 | 0.134700000  | -0.051710000 |
| 7 | -3.260470000 | 1.230500000  | -0.079910000 |
| 1 | 4.698940000  | 2.016280000  | -0.682190000 |
| 1 | 3.287550000  | -0.231470000 | -1.000690000 |
| 1 | 0.874170000  | 2.640350000  | 0.928590000  |
| 1 | -0.793070000 | 1.825420000  | -0.207230000 |
| 8 | -2.420190000 | -1.003670000 | -0.022890000 |
| 8 | -4.375370000 | 0.791660000  | -0.220450000 |

|   |              |              |             |
|---|--------------|--------------|-------------|
| 8 | -2.945660000 | 2.406310000  | 0.057990000 |
| 6 | 0.514010000  | -1.444830000 | 0.049150000 |
| 6 | -0.173240000 | -1.897760000 | 1.284130000 |
| 7 | -0.605710000 | -2.243070000 | 2.293150000 |

## 62

|    |              |              |              |
|----|--------------|--------------|--------------|
| 6  | 0.087780000  | 2.906030000  | 0.211110000  |
| 7  | -0.494040000 | 3.892970000  | 0.317610000  |
| 6  | 1.830040000  | 1.919410000  | -1.063590000 |
| 7  | 2.448660000  | 2.137590000  | -2.008960000 |
| 6  | -3.352620000 | -0.521240000 | -0.081530000 |
| 6  | -3.502480000 | 0.743940000  | -0.625370000 |
| 6  | -2.221910000 | 1.315470000  | -0.666880000 |
| 6  | -1.300840000 | 0.386810000  | -0.160200000 |
| 7  | -2.040480000 | -0.748360000 | 0.173720000  |
| 6  | 0.132760000  | 0.354000000  | -0.091850000 |
| 6  | 0.793650000  | -0.842250000 | -0.153840000 |
| 6  | 2.213190000  | -1.052660000 | -0.044600000 |
| 7  | 2.593870000  | -2.618900000 | -0.118050000 |
| 1  | -4.429180000 | 1.187010000  | -0.949640000 |
| 1  | -1.990870000 | 2.285710000  | -1.069870000 |
| 1  | -1.690520000 | -1.548940000 | 0.678980000  |
| 1  | 0.221820000  | -1.737380000 | -0.345700000 |
| 8  | 3.127270000  | -0.299440000 | 0.071200000  |
| 8  | 3.771500000  | -2.867840000 | -0.197750000 |
| 8  | 1.673300000  | -3.425640000 | -0.071810000 |
| 6  | 0.934050000  | 1.693880000  | 0.094740000  |
| 6  | 1.681930000  | 1.637160000  | 1.375370000  |
| 7  | 2.171420000  | 1.643050000  | 2.416910000  |
| 17 | -4.542180000 | -1.695930000 | 0.296730000  |

## 63

|   |              |              |              |
|---|--------------|--------------|--------------|
| 6 | -0.096730000 | 2.837060000  | 0.269760000  |
| 7 | -0.750040000 | 3.772740000  | 0.416310000  |
| 6 | 1.673920000  | 1.992490000  | -1.077120000 |
| 7 | 2.252310000  | 2.255210000  | -2.036540000 |
| 6 | -3.352000000 | -0.722620000 | -0.010020000 |
| 6 | -3.532340000 | 0.505390000  | -0.644800000 |
| 6 | -2.283060000 | 1.125760000  | -0.727130000 |
| 6 | -1.331250000 | 0.261880000  | -0.156000000 |
| 7 | -2.015900000 | -0.863210000 | 0.255070000  |
| 6 | 0.110950000  | 0.307530000  | -0.084280000 |
| 6 | 0.825460000  | -0.850420000 | -0.157160000 |
| 6 | 2.262460000  | -0.990710000 | -0.074200000 |
| 7 | 2.716960000  | -2.534180000 | -0.108870000 |
| 1 | -4.477410000 | 0.884440000  | -0.998750000 |
| 1 | -2.080250000 | 2.077210000  | -1.187710000 |
| 1 | -1.614230000 | -1.615520000 | 0.796240000  |
| 1 | 0.293720000  | -1.772330000 | -0.339600000 |
| 8 | 3.134200000  | -0.186500000 | -0.004610000 |
| 8 | 3.898600000  | -2.730500000 | -0.246150000 |
| 8 | 1.838410000  | -3.376740000 | 0.025280000  |
| 6 | 0.831600000  | 1.692770000  | 0.103970000  |
| 6 | 1.623690000  | 1.665930000  | 1.358230000  |



|   |              |              |             |
|---|--------------|--------------|-------------|
| 7 | 2.150880000  | 1.683370000  | 2.381020000 |
| 6 | -4.326910000 | -1.745820000 | 0.374740000 |
| 8 | -5.512940000 | -1.658050000 | 0.154680000 |
| 1 | -3.902170000 | -2.632410000 | 0.891530000 |

#### 64

|   |              |              |              |
|---|--------------|--------------|--------------|
| 6 | -0.413110000 | -2.905530000 | 0.348200000  |
| 7 | 0.151190000  | -3.893310000 | 0.520330000  |
| 6 | -2.111670000 | -1.932290000 | -1.007110000 |
| 7 | -2.729680000 | -2.166350000 | -1.949110000 |
| 6 | 3.180260000  | 0.207250000  | -0.152820000 |
| 6 | 3.218890000  | -1.023030000 | -0.784350000 |
| 6 | 1.893980000  | -1.481520000 | -0.819390000 |
| 6 | 1.077220000  | -0.510540000 | -0.218160000 |
| 7 | 1.900690000  | 0.524610000  | 0.170520000  |
| 6 | -0.363210000 | -0.387350000 | -0.101440000 |
| 6 | -0.938410000 | 0.839860000  | -0.197850000 |
| 6 | -2.355350000 | 1.140710000  | -0.101340000 |
| 7 | -2.646440000 | 2.717750000  | -0.178930000 |
| 1 | 4.100940000  | -1.510210000 | -1.164740000 |
| 1 | 1.561830000  | -2.401120000 | -1.269630000 |
| 1 | 1.657700000  | 1.339490000  | 0.719030000  |
| 1 | -0.308490000 | 1.690880000  | -0.413050000 |
| 8 | -3.301530000 | 0.431110000  | 0.000880000  |
| 8 | -3.805720000 | 3.031340000  | -0.283480000 |
| 8 | -1.678740000 | 3.463230000  | -0.109630000 |
| 6 | -1.223880000 | -1.679660000 | 0.151330000  |
| 6 | -1.988230000 | -1.524860000 | 1.413070000  |
| 7 | -2.500280000 | -1.450720000 | 2.440970000  |
| 7 | 4.246690000  | 1.099000000  | 0.207810000  |
| 8 | 5.380370000  | 0.781620000  | -0.119810000 |
| 8 | 3.927360000  | 2.118430000  | 0.820350000  |

#### 65

|   |             |              |              |
|---|-------------|--------------|--------------|
| 7 | 3.645650000 | 0.163070000  | -0.615140000 |
| 6 | 3.766340000 | 1.623170000  | -0.694030000 |
| 6 | 4.858070000 | -0.666770000 | -0.667220000 |
| 1 | 2.957650000 | 2.008740000  | -1.326630000 |
| 6 | 3.776250000 | 2.355400000  | 0.658080000  |
| 1 | 4.690910000 | 1.838700000  | -1.234360000 |
| 1 | 5.597350000 | -0.115960000 | -1.254310000 |
| 6 | 5.444530000 | -1.034960000 | 0.702690000  |
| 1 | 4.630710000 | -1.573970000 | -1.233370000 |
| 6 | 3.848670000 | 3.874370000  | 0.478900000  |
| 1 | 2.882580000 | 2.088730000  | 1.231800000  |
| 1 | 4.630330000 | 2.007800000  | 1.246400000  |
| 6 | 6.674770000 | -1.936550000 | 0.569090000  |
| 1 | 5.710640000 | -0.120240000 | 1.241140000  |
| 1 | 4.675630000 | -1.535380000 | 1.299430000  |
| 1 | 3.859990000 | 4.379450000  | 1.446870000  |
| 1 | 4.753940000 | 4.170150000  | -0.059760000 |
| 1 | 2.989210000 | 4.255070000  | -0.081300000 |
| 1 | 7.082870000 | -2.186240000 | 1.550770000  |

|    |              |              |              |
|----|--------------|--------------|--------------|
| 1  | 6.428850000  | -2.875910000 | 0.064720000  |
| 1  | 7.468510000  | -1.448740000 | -0.004950000 |
| 32 | -2.669160000 | -1.408360000 | 0.102640000  |
| 6  | 2.443410000  | -0.426430000 | -0.454050000 |
| 6  | 2.124080000  | -1.812100000 | -0.358500000 |
| 6  | 0.755060000  | -1.919050000 | -0.226240000 |
| 6  | 0.184370000  | -0.620020000 | -0.227610000 |
| 7  | 1.274960000  | 0.264780000  | -0.371280000 |
| 6  | -1.126930000 | -0.172240000 | -0.117750000 |
| 6  | -1.516600000 | 1.166670000  | -0.142700000 |
| 6  | -2.890550000 | 1.401440000  | -0.007750000 |
| 7  | -3.355470000 | 2.874810000  | -0.029550000 |
| 1  | 2.831660000  | -2.623180000 | -0.383780000 |
| 1  | 0.176360000  | -2.823550000 | -0.133730000 |
| 1  | 1.191220000  | 1.266470000  | -0.383710000 |
| 1  | -0.849850000 | 2.008230000  | -0.256470000 |
| 8  | -3.765560000 | 0.547740000  | 0.127800000  |
| 8  | -2.482570000 | 3.727480000  | -0.154680000 |
| 8  | -4.544320000 | 3.075040000  | 0.079080000  |
| 9  | -3.709320000 | -1.705610000 | -1.266690000 |
| 9  | -1.897510000 | -3.013170000 | 0.094090000  |
| 9  | -3.388810000 | -1.566900000 | 1.684090000  |

## 66

|    |              |              |              |
|----|--------------|--------------|--------------|
| 7  | 4.579460000  | 0.691800000  | -0.093660000 |
| 6  | 4.567710000  | 2.141640000  | 0.065710000  |
| 6  | 5.843430000  | -0.018530000 | 0.086210000  |
| 1  | 3.884630000  | 2.603490000  | -0.652730000 |
| 1  | 5.564470000  | 2.527080000  | -0.141100000 |
| 1  | 6.652570000  | 0.600420000  | -0.300150000 |
| 1  | 5.834770000  | -0.949380000 | -0.480010000 |
| 32 | -1.623150000 | -1.388910000 | 0.010950000  |
| 6  | 3.419750000  | -0.001310000 | -0.058360000 |
| 6  | 3.206360000  | -1.406660000 | -0.052010000 |
| 6  | 1.841430000  | -1.620730000 | -0.041260000 |
| 6  | 1.174820000  | -0.370150000 | -0.035020000 |
| 7  | 2.200120000  | 0.599100000  | -0.042590000 |
| 6  | -0.174400000 | -0.025730000 | -0.021220000 |
| 6  | -0.661840000 | 1.278310000  | -0.024290000 |
| 6  | -2.058630000 | 1.408540000  | -0.001410000 |
| 7  | -2.627460000 | 2.847780000  | -0.004390000 |
| 1  | 3.974760000  | -2.160740000 | -0.051550000 |
| 1  | 1.329150000  | -2.568810000 | -0.036670000 |
| 1  | 2.041380000  | 1.591810000  | -0.016950000 |
| 1  | -0.053260000 | 2.170020000  | -0.044490000 |
| 8  | -2.874700000 | 0.492250000  | 0.020260000  |
| 8  | -1.811130000 | 3.762630000  | -0.018060000 |
| 8  | -3.832410000 | 2.958980000  | 0.007420000  |
| 9  | -2.520660000 | -1.688030000 | -1.453620000 |
| 9  | -0.730700000 | -2.927670000 | 0.005300000  |
| 9  | -2.468950000 | -1.669200000 | 1.509340000  |
| 1  | 4.282640000  | 2.445730000  | 1.080980000  |
| 1  | 6.041720000  | -0.244410000 | 1.140560000  |

**67**

|    |              |              |              |
|----|--------------|--------------|--------------|
| 7  | 4.789570000  | 2.020650000  | 0.055450000  |
| 32 | -0.722630000 | -1.498420000 | 0.001650000  |
| 6  | 3.823040000  | 1.068430000  | 0.002170000  |
| 6  | 3.964340000  | -0.335670000 | -0.014630000 |
| 6  | 2.689530000  | -0.878220000 | -0.014740000 |
| 6  | 1.740980000  | 0.172570000  | 0.000070000  |
| 7  | 2.502390000  | 1.362060000  | 0.006330000  |
| 6  | 0.345390000  | 0.180840000  | -0.001590000 |
| 6  | -0.441150000 | 1.325210000  | -0.003980000 |
| 6  | -1.832580000 | 1.118230000  | 0.001500000  |
| 7  | -2.726330000 | 2.385630000  | -0.003110000 |
| 1  | 4.902690000  | -0.867020000 | -0.026420000 |
| 1  | 2.424510000  | -1.922610000 | -0.030880000 |
| 1  | 2.115420000  | 2.290000000  | 0.068740000  |
| 1  | -0.065450000 | 2.337570000  | -0.012830000 |
| 8  | -2.407450000 | 0.037880000  | 0.008960000  |
| 8  | -2.147150000 | 3.465700000  | -0.009320000 |
| 8  | -3.922800000 | 2.208430000  | -0.000370000 |
| 9  | -1.508290000 | -1.975930000 | -1.478590000 |
| 9  | 0.511400000  | -2.774740000 | -0.005780000 |
| 9  | -1.497320000 | -1.980930000 | 1.485770000  |
| 1  | 4.575190000  | 2.977400000  | -0.177250000 |
| 1  | 5.742110000  | 1.735680000  | -0.104410000 |

**68**

|    |              |              |              |
|----|--------------|--------------|--------------|
| 8  | -4.659390000 | 2.147610000  | 0.000390000  |
| 32 | 0.677870000  | -1.522010000 | 0.000010000  |
| 6  | -3.794050000 | 1.129610000  | 0.000020000  |
| 6  | -3.975990000 | -0.257900000 | -0.000420000 |
| 6  | -2.702200000 | -0.823480000 | -0.000720000 |
| 6  | -1.741720000 | 0.211000000  | -0.000050000 |
| 7  | -2.477320000 | 1.410500000  | 0.000160000  |
| 6  | -0.337520000 | 0.190360000  | 0.000060000  |
| 6  | 0.464890000  | 1.314280000  | 0.000290000  |
| 6  | 1.862330000  | 1.092110000  | 0.001060000  |
| 7  | 2.766470000  | 2.361060000  | -0.000060000 |
| 1  | -4.923050000 | -0.773890000 | -0.000660000 |
| 1  | -2.456770000 | -1.872570000 | -0.001180000 |
| 1  | -2.103700000 | 2.346900000  | 0.000930000  |
| 1  | 0.103380000  | 2.331940000  | 0.000070000  |
| 8  | 2.427140000  | 0.014290000  | 0.000650000  |
| 8  | 2.190460000  | 3.441360000  | -0.000640000 |
| 8  | 3.960860000  | 2.175110000  | -0.000580000 |
| 9  | 1.465100000  | -1.996490000 | 1.477320000  |
| 9  | -0.572460000 | -2.774950000 | -0.000230000 |
| 9  | 1.465450000  | -1.996400000 | -1.477150000 |
| 1  | -5.565820000 | 1.818780000  | 0.000410000  |

**69**

|    |             |              |              |
|----|-------------|--------------|--------------|
| 32 | 0.107780000 | -1.482210000 | 0.000000000  |
| 1  | 3.816260000 | 3.541740000  | -0.000190000 |
| 6  | 3.400640000 | 2.546060000  | -0.000080000 |
| 6  | 4.033430000 | 1.307440000  | 0.000150000  |

|   |              |              |              |
|---|--------------|--------------|--------------|
| 6 | 3.033690000  | 0.329560000  | 0.000140000  |
| 6 | 1.782740000  | 0.978800000  | -0.000050000 |
| 7 | 2.061720000  | 2.346380000  | -0.000170000 |
| 6 | 0.457720000  | 0.476880000  | -0.000040000 |
| 6 | -0.667900000 | 1.263500000  | -0.000030000 |
| 6 | -1.931090000 | 0.604920000  | -0.000230000 |
| 7 | -3.189470000 | 1.538990000  | 0.000060000  |
| 1 | 5.099120000  | 1.145310000  | 0.000300000  |
| 1 | 3.164990000  | -0.739400000 | 0.000270000  |
| 1 | 1.374750000  | 3.082900000  | -0.000430000 |
| 1 | -0.659720000 | 2.343600000  | 0.000070000  |
| 8 | -2.131800000 | -0.586760000 | -0.000270000 |
| 8 | -2.973380000 | 2.743690000  | 0.000030000  |
| 8 | -4.266480000 | 0.992330000  | 0.000250000  |
| 9 | -0.513730000 | -2.170530000 | -1.468980000 |
| 9 | 1.690220000  | -2.256800000 | -0.000140000 |
| 9 | -0.513400000 | -2.170220000 | 1.469280000  |

## 70

|    |              |              |              |
|----|--------------|--------------|--------------|
| 32 | 1.223940000  | -1.476380000 | 0.000030000  |
| 6  | -3.653700000 | 0.318060000  | 0.000000000  |
| 6  | -3.583040000 | -1.069950000 | 0.000080000  |
| 6  | -2.224400000 | -1.398340000 | -0.000440000 |
| 6  | -1.471780000 | -0.207370000 | -0.000130000 |
| 7  | -2.403950000 | 0.835860000  | -0.000350000 |
| 6  | -0.076640000 | 0.031130000  | -0.000060000 |
| 6  | 0.495090000  | 1.280280000  | -0.000110000 |
| 6  | 1.917440000  | 1.345550000  | -0.000030000 |
| 7  | 2.540510000  | 2.779870000  | 0.000030000  |
| 1  | -4.425180000 | -1.741580000 | 0.000290000  |
| 1  | -1.799060000 | -2.388210000 | -0.000630000 |
| 1  | -2.198860000 | 1.822780000  | -0.000440000 |
| 1  | -0.056450000 | 2.209020000  | -0.000230000 |
| 8  | 2.686560000  | 0.411780000  | 0.000190000  |
| 8  | 1.751100000  | 3.715010000  | -0.000110000 |
| 8  | 3.746610000  | 2.843690000  | 0.000040000  |
| 9  | 2.103720000  | -1.764440000 | 1.469830000  |
| 9  | 0.239650000  | -2.939280000 | 0.000070000  |
| 9  | 2.103790000  | -1.764560000 | -1.469700000 |
| 17 | -5.032870000 | 1.334510000  | 0.000220000  |

## 71

|    |              |              |              |
|----|--------------|--------------|--------------|
| 32 | 1.110150000  | -1.522220000 | 0.000020000  |
| 6  | -3.660750000 | 0.566880000  | -0.000050000 |
| 6  | -3.651560000 | -0.829990000 | -0.000420000 |
| 6  | -2.319720000 | -1.240230000 | -0.000390000 |
| 6  | -1.503870000 | -0.086780000 | -0.000030000 |
| 7  | -2.364010000 | 0.997140000  | 0.000150000  |
| 6  | -0.085260000 | 0.067410000  | 0.000100000  |
| 6  | 0.546430000  | 1.280430000  | 0.000320000  |
| 6  | 1.979460000  | 1.296420000  | 0.000760000  |
| 7  | 2.643310000  | 2.719690000  | -0.000020000 |
| 1  | -4.533160000 | -1.450280000 | -0.000680000 |
| 1  | -1.949890000 | -2.251990000 | -0.000620000 |

|   |              |              |              |
|---|--------------|--------------|--------------|
| 1 | -2.087210000 | 1.967010000  | 0.000480000  |
| 1 | 0.037750000  | 2.233560000  | 0.000280000  |
| 8 | 2.716280000  | 0.345290000  | 0.000320000  |
| 8 | 1.878050000  | 3.674490000  | -0.000300000 |
| 8 | 3.849830000  | 2.748990000  | -0.000560000 |
| 9 | 1.991880000  | -1.823450000 | 1.463240000  |
| 9 | 0.065220000  | -2.933940000 | -0.000140000 |
| 9 | 1.992010000  | -1.823260000 | -1.463170000 |
| 6 | -4.784940000 | 1.507420000  | 0.000110000  |
| 8 | -5.944800000 | 1.164960000  | 0.000130000  |
| 1 | -4.502840000 | 2.581680000  | 0.000600000  |

## 72

|    |              |              |              |
|----|--------------|--------------|--------------|
| 7  | 4.643990000  | 0.857090000  | -0.000060000 |
| 8  | 5.720790000  | 0.279620000  | 0.000070000  |
| 8  | 4.475220000  | 2.077100000  | -0.000330000 |
| 32 | -1.491560000 | -1.482770000 | 0.000050000  |
| 6  | 3.457240000  | 0.045320000  | 0.000050000  |
| 6  | 3.319020000  | -1.333630000 | 0.000300000  |
| 6  | 1.941850000  | -1.580280000 | 0.000290000  |
| 6  | 1.266680000  | -0.342320000 | 0.000010000  |
| 7  | 2.240620000  | 0.639970000  | -0.000090000 |
| 6  | -0.130970000 | -0.029990000 | -0.000110000 |
| 6  | -0.618410000 | 1.243540000  | -0.000340000 |
| 6  | -2.046180000 | 1.422230000  | -0.001060000 |
| 7  | -2.546530000 | 2.910160000  | 0.000050000  |
| 1  | 4.125470000  | -2.047490000 | 0.000470000  |
| 1  | 1.457730000  | -2.542340000 | 0.000460000  |
| 1  | 2.128040000  | 1.644240000  | -0.000290000 |
| 1  | -0.003170000 | 2.132140000  | -0.000250000 |
| 8  | -2.881050000 | 0.558530000  | -0.000740000 |
| 8  | -1.677320000 | 3.770040000  | 0.000650000  |
| 8  | -3.742100000 | 3.072960000  | 0.000610000  |
| 9  | -2.401560000 | -1.679620000 | -1.462130000 |
| 9  | -0.602110000 | -2.996670000 | -0.000050000 |
| 9  | -2.401260000 | -1.679680000 | 1.462410000  |

## 73

|    |              |              |              |
|----|--------------|--------------|--------------|
| 16 | -2.631870000 | -1.837360000 | 0.611550000  |
| 8  | -2.043380000 | -3.168160000 | 0.559810000  |
| 6  | -3.782320000 | -1.839630000 | -0.749550000 |
| 7  | -4.491020000 | -2.014790000 | -1.643540000 |
| 8  | -3.299010000 | -1.372310000 | 1.808960000  |
| 6  | 2.184310000  | -0.578500000 | 0.095600000  |
| 6  | 1.984050000  | -1.981420000 | 0.175220000  |
| 6  | 0.618880000  | -2.211760000 | 0.201420000  |
| 6  | -0.058580000 | -0.972710000 | 0.128890000  |
| 7  | 0.952410000  | 0.004650000  | 0.040650000  |
| 6  | -1.410880000 | -0.585590000 | 0.073160000  |
| 6  | -1.818690000 | 0.696850000  | -0.255160000 |
| 6  | -3.126370000 | 1.249290000  | -0.205200000 |
| 7  | -3.086750000 | 2.839130000  | -0.596140000 |
| 1  | 2.757730000  | -2.730090000 | 0.189660000  |

|   |              |              |              |
|---|--------------|--------------|--------------|
| 1 | 0.133130000  | -3.170530000 | 0.234850000  |
| 1 | 0.781310000  | 0.988940000  | 0.163000000  |
| 1 | -1.066790000 | 1.386560000  | -0.608420000 |
| 8 | -4.209870000 | 0.818580000  | 0.044990000  |
| 8 | -1.994040000 | 3.372880000  | -0.770000000 |
| 8 | -4.161570000 | 3.383900000  | -0.673810000 |
| 7 | 3.332770000  | 0.127030000  | 0.071170000  |
| 6 | 4.623970000  | -0.563760000 | 0.170470000  |
| 6 | 3.337220000  | 1.584200000  | -0.093850000 |
| 6 | 5.195680000  | -1.004020000 | -1.183600000 |
| 1 | 5.319590000  | 0.118540000  | 0.667330000  |
| 1 | 4.263290000  | 1.849120000  | -0.610780000 |
| 1 | 2.527320000  | 1.869930000  | -0.773320000 |
| 6 | 3.240420000  | 2.365390000  | 1.225570000  |
| 1 | 4.068330000  | 2.064440000  | 1.875950000  |
| 6 | 3.273780000  | 3.879160000  | 0.998880000  |
| 1 | 2.322500000  | 2.086600000  | 1.754300000  |
| 1 | 3.210610000  | 4.415270000  | 1.948000000  |
| 1 | 4.200140000  | 4.187420000  | 0.504840000  |
| 1 | 2.437310000  | 4.210580000  | 0.376670000  |
| 1 | 4.511660000  | -1.423200000 | 0.835730000  |
| 6 | 6.550630000  | -1.700990000 | -1.033510000 |
| 1 | 4.480450000  | -1.672130000 | -1.673310000 |
| 1 | 5.297220000  | -0.128300000 | -1.833490000 |
| 1 | 6.942410000  | -2.004950000 | -2.006530000 |
| 1 | 7.290690000  | -1.041450000 | -0.570030000 |
| 1 | 6.471390000  | -2.599300000 | -0.413850000 |

#### 74

|    |              |              |              |
|----|--------------|--------------|--------------|
| 16 | -1.464550000 | -1.875230000 | 0.416420000  |
| 8  | -0.755910000 | -3.115930000 | 0.138350000  |
| 6  | -2.697400000 | -1.802730000 | -0.867550000 |
| 7  | -3.446670000 | -1.917690000 | -1.737860000 |
| 8  | -2.090220000 | -1.654320000 | 1.702680000  |
| 6  | 3.169400000  | -0.075510000 | -0.143610000 |
| 6  | 3.107000000  | -1.482410000 | -0.290410000 |
| 6  | 1.771120000  | -1.850900000 | -0.239940000 |
| 6  | 0.981810000  | -0.692300000 | -0.067280000 |
| 7  | 1.890640000  | 0.382130000  | -0.030180000 |
| 6  | -0.403660000 | -0.439400000 | 0.006820000  |
| 6  | -0.946580000 | 0.827400000  | -0.103370000 |
| 6  | -2.295990000 | 1.233240000  | 0.096420000  |
| 7  | -2.432070000 | 2.855960000  | -0.054300000 |
| 1  | 3.946570000  | -2.144060000 | -0.418070000 |
| 1  | 1.378650000  | -2.846990000 | -0.340230000 |
| 1  | 1.637530000  | 1.315370000  | 0.250070000  |
| 1  | -0.286590000 | 1.633180000  | -0.388670000 |
| 8  | -3.313540000 | 0.660660000  | 0.334760000  |
| 8  | -1.407930000 | 3.515670000  | -0.208520000 |
| 8  | -3.555660000 | 3.292820000  | 0.010500000  |
| 7  | 4.243570000  | 0.747400000  | -0.125330000 |
| 6  | 5.580520000  | 0.168770000  | -0.025570000 |
| 6  | 4.073390000  | 2.161800000  | 0.186640000  |
| 1  | 6.309950000  | 0.912160000  | -0.345770000 |

|   |             |              |              |
|---|-------------|--------------|--------------|
| 1 | 5.819030000 | -0.144540000 | 0.997920000  |
| 1 | 5.667260000 | -0.692150000 | -0.688130000 |
| 1 | 5.004030000 | 2.684290000  | -0.028180000 |
| 1 | 3.297520000 | 2.602910000  | -0.444490000 |
| 1 | 3.818910000 | 2.329910000  | 1.241470000  |

**75**

|    |              |              |              |
|----|--------------|--------------|--------------|
| 16 | 0.360740000  | -1.922720000 | -0.405890000 |
| 8  | -0.684130000 | -2.896730000 | -0.129830000 |
| 6  | 1.543210000  | -2.196620000 | 0.897210000  |
| 7  | 2.216590000  | -2.511450000 | 1.780050000  |
| 8  | 1.039560000  | -1.905040000 | -1.683480000 |
| 6  | -3.558200000 | 1.139840000  | 0.084600000  |
| 6  | -3.906560000 | -0.206720000 | 0.283520000  |
| 6  | -2.731250000 | -0.949850000 | 0.245440000  |
| 6  | -1.645940000 | -0.073510000 | 0.036620000  |
| 7  | -2.208940000 | 1.215650000  | -0.037350000 |
| 6  | -0.242150000 | -0.232390000 | -0.021570000 |
| 6  | 0.639980000  | 0.821650000  | 0.086460000  |
| 6  | 2.055060000  | 0.816040000  | -0.098470000 |
| 7  | 2.656370000  | 2.327990000  | 0.034120000  |
| 1  | -4.906240000 | -0.579120000 | 0.440740000  |
| 1  | -2.640440000 | -2.012020000 | 0.386030000  |
| 1  | -1.711330000 | 2.030480000  | -0.362170000 |
| 1  | 0.238010000  | 1.787730000  | 0.354390000  |
| 8  | 2.860510000  | -0.033840000 | -0.313440000 |
| 8  | 1.865030000  | 3.257860000  | 0.158540000  |
| 8  | 3.859100000  | 2.416240000  | -0.012650000 |
| 7  | -4.361390000 | 2.231840000  | -0.046520000 |
| 1  | -5.333430000 | 2.120620000  | 0.194040000  |
| 1  | -3.982330000 | 3.149090000  | 0.133130000  |

**76**

|    |              |              |              |
|----|--------------|--------------|--------------|
| 16 | 0.333090000  | -1.912230000 | -0.419010000 |
| 8  | -0.731850000 | -2.868640000 | -0.163130000 |
| 6  | 1.498290000  | -2.220440000 | 0.890710000  |
| 7  | 2.159220000  | -2.552770000 | 1.776630000  |
| 8  | 1.021330000  | -1.887550000 | -1.691010000 |
| 8  | -4.254780000 | 2.307250000  | -0.023100000 |
| 6  | -3.547890000 | 1.177190000  | 0.083800000  |
| 6  | -3.917180000 | -0.149350000 | 0.307720000  |
| 6  | -2.739500000 | -0.901840000 | 0.276340000  |
| 6  | -1.654980000 | -0.034890000 | 0.044290000  |
| 7  | -2.207690000 | 1.251750000  | -0.053950000 |
| 6  | -0.246250000 | -0.211680000 | -0.019560000 |
| 6  | 0.645250000  | 0.825880000  | 0.093030000  |
| 6  | 2.067710000  | 0.795190000  | -0.084960000 |
| 7  | 2.699660000  | 2.289310000  | 0.037260000  |
| 1  | -4.918740000 | -0.513310000 | 0.473070000  |
| 1  | -2.655480000 | -1.962800000 | 0.428450000  |
| 1  | -1.720930000 | 2.091610000  | -0.329390000 |
| 1  | 0.258000000  | 1.799650000  | 0.356600000  |
| 8  | 2.850610000  | -0.076430000 | -0.287380000 |
| 8  | 1.924700000  | 3.233320000  | 0.143990000  |

|   |              |             |             |
|---|--------------|-------------|-------------|
| 8 | 3.904230000  | 2.349320000 | 0.001270000 |
| 1 | -5.197380000 | 2.123950000 | 0.062320000 |

**77**

|    |              |              |              |
|----|--------------|--------------|--------------|
| 16 | 0.501920000  | 1.694900000  | -0.446240000 |
| 8  | 1.829050000  | 2.247430000  | -0.238820000 |
| 6  | -0.462600000 | 2.387070000  | 0.879720000  |
| 7  | -0.961540000 | 2.919740000  | 1.773780000  |
| 8  | -0.196870000 | 1.871270000  | -1.700700000 |
| 1  | 3.498310000  | -3.506290000 | -0.087560000 |
| 6  | 3.198450000  | -2.478590000 | 0.044170000  |
| 6  | 3.948050000  | -1.354390000 | 0.362720000  |
| 6  | 3.079380000  | -0.254780000 | 0.360720000  |
| 6  | 1.790090000  | -0.722410000 | 0.050950000  |
| 7  | 1.907420000  | -2.099600000 | -0.123730000 |
| 6  | 0.504850000  | -0.097620000 | -0.014520000 |
| 6  | -0.664130000 | -0.791830000 | 0.120360000  |
| 6  | -2.010870000 | -0.309410000 | -0.053320000 |
| 7  | -3.081610000 | -1.525330000 | 0.046370000  |
| 1  | 5.005810000  | -1.339630000 | 0.570040000  |
| 1  | 3.330640000  | 0.767960000  | 0.577230000  |
| 1  | 1.170640000  | -2.705230000 | -0.450870000 |
| 1  | -0.603110000 | -1.834370000 | 0.399230000  |
| 8  | -2.471200000 | 0.768960000  | -0.236530000 |
| 8  | -2.641120000 | -2.668010000 | 0.094240000  |
| 8  | -4.242620000 | -1.198730000 | 0.050830000  |

**78**

|    |              |              |              |
|----|--------------|--------------|--------------|
| 16 | 1.017080000  | -1.887030000 | -0.450840000 |
| 8  | 0.164380000  | -3.043320000 | -0.235350000 |
| 6  | 2.214480000  | -1.987580000 | 0.860850000  |
| 7  | 2.926880000  | -2.193730000 | 1.745190000  |
| 8  | 1.691040000  | -1.677270000 | -1.713230000 |
| 17 | -4.691720000 | 1.439730000  | -0.055760000 |
| 6  | -3.431360000 | 0.290700000  | 0.108800000  |
| 6  | -3.502830000 | -1.064950000 | 0.392780000  |
| 6  | -2.189030000 | -1.550400000 | 0.365990000  |
| 6  | -1.325360000 | -0.480850000 | 0.074640000  |
| 7  | -2.135340000 | 0.648040000  | -0.063440000 |
| 6  | 0.096680000  | -0.353330000 | -0.004610000 |
| 6  | 0.742590000  | 0.843870000  | 0.127060000  |
| 6  | 2.144760000  | 1.120240000  | -0.057330000 |
| 7  | 2.444580000  | 2.710300000  | 0.050380000  |
| 1  | -4.404100000 | -1.619820000 | 0.593390000  |
| 1  | -1.877630000 | -2.561840000 | 0.556400000  |
| 1  | -1.835140000 | 1.556510000  | -0.383910000 |
| 1  | 0.158480000  | 1.707270000  | 0.413210000  |
| 8  | 3.089180000  | 0.428570000  | -0.254270000 |
| 8  | 1.482480000  | 3.466490000  | 0.116030000  |
| 8  | 3.609400000  | 3.022590000  | 0.042860000  |

**79**

|    |              |              |             |
|----|--------------|--------------|-------------|
| 16 | -0.914890000 | -1.876350000 | 0.480350000 |
| 8  | 0.011690000  | -2.982370000 | 0.322320000 |



|   |              |              |              |
|---|--------------|--------------|--------------|
| 6 | -2.079080000 | -2.088600000 | -0.846310000 |
| 7 | -2.766980000 | -2.353260000 | -1.734470000 |
| 8 | -1.625820000 | -1.656300000 | 1.720480000  |
| 6 | 4.478350000  | 1.516170000  | 0.122210000  |
| 6 | 3.443480000  | 0.497090000  | -0.069190000 |
| 6 | 3.551950000  | -0.846080000 | -0.431570000 |
| 6 | 2.266920000  | -1.390370000 | -0.432040000 |
| 6 | 1.364130000  | -0.365800000 | -0.083800000 |
| 7 | 2.116730000  | 0.774590000  | 0.118830000  |
| 6 | -0.071360000 | -0.308280000 | -0.004740000 |
| 6 | -0.764890000 | 0.852600000  | -0.163060000 |
| 6 | -2.186070000 | 1.070710000  | 0.011680000  |
| 7 | -2.548370000 | 2.644670000  | -0.058690000 |
| 1 | 4.477610000  | -1.348040000 | -0.662600000 |
| 1 | 1.991790000  | -2.401910000 | -0.672370000 |
| 1 | 1.759550000  | 1.647730000  | 0.479220000  |
| 1 | -0.216030000 | 1.734840000  | -0.462760000 |
| 8 | -3.097330000 | 0.331360000  | 0.178170000  |
| 8 | -1.613120000 | 3.436090000  | -0.053890000 |
| 8 | -3.723630000 | 2.909940000  | -0.091730000 |
| 8 | 5.659380000  | 1.309490000  | -0.037110000 |
| 1 | 4.105810000  | 2.516660000  | 0.428140000  |

## 80

|    |              |              |              |
|----|--------------|--------------|--------------|
| 16 | -1.320530000 | -1.850090000 | 0.515460000  |
| 8  | -0.504660000 | -3.042990000 | 0.382250000  |
| 6  | -2.504900000 | -1.979070000 | -0.802570000 |
| 7  | -3.218750000 | -2.193710000 | -1.683760000 |
| 8  | -1.998140000 | -1.528290000 | 1.751260000  |
| 7  | 4.344870000  | 0.903770000  | 0.045410000  |
| 6  | 3.236810000  | 0.008610000  | -0.141110000 |
| 6  | 3.218550000  | -1.328800000 | -0.498740000 |
| 6  | 1.873200000  | -1.718420000 | -0.475860000 |
| 6  | 1.099600000  | -0.600330000 | -0.114650000 |
| 7  | 1.973560000  | 0.451250000  | 0.077170000  |
| 6  | -0.325170000 | -0.386240000 | -0.013890000 |
| 6  | -0.888480000 | 0.836870000  | -0.187940000 |
| 6  | -2.285040000 | 1.202240000  | -0.013590000 |
| 7  | -2.492200000 | 2.797710000  | -0.097970000 |
| 1  | 4.080170000  | -1.928070000 | -0.740840000 |
| 1  | 1.484020000  | -2.693610000 | -0.708270000 |
| 1  | 1.770790000  | 1.376830000  | 0.431940000  |
| 1  | -0.251280000 | 1.653370000  | -0.500820000 |
| 8  | -3.259890000 | 0.552170000  | 0.159510000  |
| 8  | -1.482390000 | 3.489530000  | -0.103090000 |
| 8  | -3.636250000 | 3.175340000  | -0.131530000 |
| 8  | 5.464470000  | 0.465900000  | -0.174290000 |
| 8  | 4.072500000  | 2.047160000  | 0.412750000  |

## 81

|   |              |             |              |
|---|--------------|-------------|--------------|
| 7 | -2.708120000 | 0.087830000 | -0.327590000 |
| 6 | -2.571310000 | 1.549440000 | -0.104590000 |
| 6 | -3.747670000 | 2.396490000 | -0.593870000 |

|   |              |              |              |
|---|--------------|--------------|--------------|
| 6 | -3.439590000 | 3.889210000  | -0.429610000 |
| 6 | -4.047820000 | -0.539510000 | -0.297700000 |
| 6 | -4.571200000 | -0.775840000 | 1.125040000  |
| 6 | -5.964580000 | -1.410850000 | 1.112820000  |
| 1 | -2.401360000 | 1.729440000  | 0.964580000  |
| 1 | -1.681030000 | 1.880140000  | -0.647440000 |
| 1 | -3.945910000 | 2.172990000  | -1.646660000 |
| 1 | -4.652560000 | 2.152740000  | -0.031610000 |
| 1 | -4.286230000 | 4.489180000  | -0.766560000 |
| 1 | -3.247630000 | 4.147120000  | 0.615540000  |
| 1 | -2.568210000 | 4.187870000  | -1.018880000 |
| 1 | -4.723890000 | 0.106790000  | -0.855210000 |
| 1 | -3.995400000 | -1.476790000 | -0.851420000 |
| 1 | -3.867820000 | -1.419930000 | 1.663600000  |
| 1 | -4.601440000 | 0.176160000  | 1.664860000  |
| 1 | -6.319150000 | -1.576060000 | 2.131670000  |
| 1 | -6.692920000 | -0.769550000 | 0.609030000  |
| 1 | -5.959850000 | -2.378350000 | 0.602770000  |
| 6 | -1.622690000 | -0.682970000 | -0.343300000 |
| 6 | -1.505430000 | -2.103040000 | -0.515680000 |
| 6 | -0.170360000 | -2.423970000 | -0.470960000 |
| 6 | 0.572110000  | -1.233530000 | -0.265250000 |
| 7 | -0.344760000 | -0.194150000 | -0.196770000 |
| 6 | 1.956120000  | -1.004450000 | -0.145510000 |
| 6 | 2.672940000  | 0.175830000  | 0.022210000  |
| 6 | 4.090620000  | 0.201070000  | 0.161240000  |
| 7 | 4.655810000  | 1.676580000  | 0.343300000  |
| 1 | -2.320680000 | -2.790220000 | -0.661430000 |
| 1 | 0.242220000  | -3.415140000 | -0.583450000 |
| 1 | -0.113960000 | 0.761420000  | 0.022600000  |
| 7 | 2.685010000  | -2.200430000 | -0.206700000 |
| 1 | 2.139890000  | 1.113460000  | 0.048850000  |
| 8 | 4.879550000  | -0.702170000 | 0.159400000  |
| 8 | 3.830580000  | 2.582010000  | 0.359780000  |
| 8 | 5.851020000  | 1.772910000  | 0.450890000  |
| 7 | 3.226330000  | -3.161340000 | -0.262290000 |

## 82

|   |              |              |              |
|---|--------------|--------------|--------------|
| 6 | 2.840220000  | 0.010780000  | -0.000050000 |
| 6 | 2.941590000  | 1.438970000  | -0.000090000 |
| 6 | 1.663890000  | 1.947670000  | -0.000070000 |
| 6 | 0.747150000  | 0.867010000  | -0.000020000 |
| 7 | 1.501760000  | -0.299300000 | -0.000010000 |
| 6 | -0.661030000 | 0.837050000  | -0.000010000 |
| 6 | -1.552400000 | -0.228090000 | -0.000030000 |
| 6 | -2.968310000 | -0.048950000 | 0.000050000  |
| 7 | -3.754440000 | -1.430550000 | -0.000040000 |
| 7 | 3.787850000  | -0.923950000 | -0.000080000 |
| 1 | 3.853770000  | 2.010230000  | -0.000100000 |
| 1 | 1.406550000  | 2.995980000  | -0.000100000 |
| 1 | 1.123980000  | -1.233660000 | 0.000090000  |
| 7 | -1.205070000 | 2.132210000  | 0.000040000  |
| 1 | -1.166980000 | -1.235930000 | -0.000110000 |
| 8 | -3.612760000 | 0.961500000  | 0.000100000  |

|   |              |              |              |
|---|--------------|--------------|--------------|
| 6 | 3.431740000  | -2.346970000 | 0.000140000  |
| 6 | 5.216060000  | -0.587140000 | 0.000030000  |
| 1 | 4.346200000  | -2.935180000 | -0.000080000 |
| 1 | 2.861090000  | -2.607880000 | 0.896820000  |
| 1 | 2.860590000  | -2.608010000 | -0.896190000 |
| 1 | 5.690670000  | -1.004200000 | 0.890870000  |
| 1 | 5.691030000  | -1.005540000 | -0.889980000 |
| 1 | 5.357510000  | 0.489260000  | -0.000790000 |
| 8 | -3.071880000 | -2.447800000 | -0.000040000 |
| 8 | -4.955370000 | -1.352120000 | -0.000050000 |
| 7 | -1.595500000 | 3.164520000  | 0.000080000  |

### 83

|   |              |              |              |
|---|--------------|--------------|--------------|
| 7 | 4.194990000  | -1.919010000 | -0.000060000 |
| 6 | 3.398340000  | -0.847000000 | 0.000010000  |
| 6 | 3.758670000  | 0.527770000  | 0.000130000  |
| 6 | 2.589660000  | 1.258940000  | 0.000130000  |
| 6 | 1.497320000  | 0.358300000  | -0.000020000 |
| 7 | 2.036160000  | -0.926080000 | -0.000100000 |
| 6 | 0.104900000  | 0.580280000  | -0.000040000 |
| 6 | -0.966700000 | -0.295300000 | -0.000100000 |
| 6 | -2.330470000 | 0.145640000  | -0.000210000 |
| 7 | -3.360570000 | -1.062070000 | 0.000080000  |
| 1 | 4.767970000  | 0.907190000  | 0.000210000  |
| 1 | 2.522810000  | 2.336340000  | 0.000200000  |
| 1 | 1.504780000  | -1.784310000 | -0.000150000 |
| 7 | -0.197600000 | 1.959650000  | -0.000030000 |
| 1 | -0.777940000 | -1.358220000 | -0.000060000 |
| 8 | -2.768410000 | 1.259380000  | -0.000050000 |
| 8 | -4.524570000 | -0.758900000 | 0.000140000  |
| 8 | -2.876420000 | -2.186590000 | 0.000050000  |
| 7 | -0.388880000 | 3.045110000  | -0.000010000 |
| 1 | 5.196940000  | -1.803000000 | 0.000110000  |
| 1 | 3.841670000  | -2.863920000 | -0.000050000 |

### 84

|   |              |              |              |
|---|--------------|--------------|--------------|
| 6 | 3.401040000  | -0.856010000 | 0.000070000  |
| 6 | 3.774150000  | 0.501420000  | 0.000300000  |
| 6 | 2.596980000  | 1.235200000  | 0.000220000  |
| 6 | 1.509690000  | 0.332790000  | -0.000050000 |
| 7 | 2.048230000  | -0.947450000 | -0.000140000 |
| 6 | 0.112910000  | 0.559100000  | -0.000190000 |
| 6 | -0.960540000 | -0.302310000 | -0.000400000 |
| 6 | -2.330150000 | 0.150940000  | -0.000560000 |
| 7 | -3.370920000 | -1.043730000 | 0.000140000  |
| 1 | 4.783030000  | 0.882320000  | 0.000500000  |
| 1 | 2.530630000  | 2.312660000  | 0.000360000  |
| 1 | 1.550430000  | -1.827420000 | -0.000340000 |
| 1 | -0.780990000 | -1.367630000 | -0.000430000 |
| 8 | -2.749230000 | 1.269200000  | 0.000060000  |
| 8 | -2.893140000 | -2.169780000 | -0.000130000 |
| 8 | -4.530470000 | -0.726800000 | 0.000620000  |
| 7 | -0.186780000 | 1.946750000  | -0.000120000 |
| 7 | -0.363730000 | 3.033330000  | -0.000050000 |

|   |             |              |             |
|---|-------------|--------------|-------------|
| 8 | 4.092540000 | -1.976140000 | 0.000010000 |
| 1 | 5.047260000 | -1.820780000 | 0.000170000 |

**85**

|   |              |              |              |
|---|--------------|--------------|--------------|
| 6 | 3.575200000  | -1.529060000 | -0.000050000 |
| 6 | 4.119170000  | -0.244610000 | 0.000120000  |
| 6 | 3.056060000  | 0.655840000  | 0.000150000  |
| 6 | 1.861850000  | -0.095590000 | 0.000000000  |
| 7 | 2.222990000  | -1.431630000 | -0.000120000 |
| 6 | 0.503380000  | 0.323120000  | 0.000020000  |
| 6 | -0.676990000 | -0.370700000 | 0.000070000  |
| 6 | -1.978730000 | 0.271980000  | -0.000010000 |
| 7 | -3.174710000 | -0.765600000 | 0.000000000  |
| 1 | 5.170590000  | -0.006750000 | 0.000210000  |
| 1 | 3.136120000  | 1.732340000  | 0.000290000  |
| 1 | 1.596390000  | -2.223680000 | -0.000280000 |
| 1 | -0.652950000 | -1.451280000 | 0.000170000  |
| 8 | -2.231240000 | 1.436500000  | -0.000090000 |
| 8 | -2.852920000 | -1.945350000 | -0.000110000 |
| 8 | -4.277650000 | -0.290060000 | 0.000210000  |
| 7 | 0.397970000  | 1.746290000  | -0.000070000 |
| 7 | 0.385410000  | 2.846180000  | -0.000130000 |
| 1 | 4.062950000  | -2.491930000 | -0.000150000 |

**86**

|    |              |              |              |
|----|--------------|--------------|--------------|
| 6  | 3.145160000  | -0.312620000 | 0.000000000  |
| 6  | 3.352260000  | 1.070700000  | 0.000310000  |
| 6  | 2.095480000  | 1.664770000  | 0.000290000  |
| 6  | 1.126540000  | 0.638830000  | 0.000050000  |
| 7  | 1.809160000  | -0.566120000 | -0.000050000 |
| 6  | -0.292510000 | 0.701680000  | 0.000070000  |
| 6  | -1.257340000 | -0.273510000 | 0.000180000  |
| 6  | -2.676620000 | 0.017790000  | 0.000020000  |
| 7  | -3.570960000 | -1.288450000 | 0.000070000  |
| 17 | 4.281690000  | -1.566620000 | -0.000190000 |
| 1  | 4.312860000  | 1.559210000  | 0.000490000  |
| 1  | 1.903020000  | 2.727090000  | 0.000500000  |
| 1  | 1.411570000  | -1.495420000 | -0.000400000 |
| 1  | -0.958310000 | -1.312140000 | 0.000410000  |
| 8  | -3.217030000 | 1.080830000  | -0.000270000 |
| 8  | -2.962170000 | -2.349200000 | 0.000140000  |
| 8  | -4.758660000 | -1.107880000 | 0.000010000  |
| 7  | -0.751990000 | 2.048180000  | -0.000120000 |
| 7  | -1.045170000 | 3.108940000  | -0.000230000 |

**87**

|   |              |              |              |
|---|--------------|--------------|--------------|
| 6 | 3.157190000  | -0.453060000 | 0.000000000  |
| 6 | 3.385530000  | 0.928170000  | 0.000210000  |
| 6 | 2.145630000  | 1.555600000  | 0.000220000  |
| 6 | 1.156810000  | 0.546130000  | 0.000040000  |
| 7 | 1.808550000  | -0.667240000 | -0.000100000 |
| 6 | -0.265410000 | 0.647710000  | 0.000040000  |
| 6 | -1.253610000 | -0.297560000 | 0.000120000  |
| 6 | -2.672050000 | 0.028250000  | 0.000000000  |

|   |              |              |              |
|---|--------------|--------------|--------------|
| 7 | -3.596570000 | -1.255740000 | 0.000050000  |
| 1 | 4.360070000  | 1.390090000  | 0.000330000  |
| 1 | 1.973240000  | 2.621450000  | 0.000380000  |
| 1 | 1.377690000  | -1.581960000 | -0.000330000 |
| 1 | -0.983220000 | -1.344360000 | 0.000280000  |
| 8 | -3.181680000 | 1.104330000  | -0.000140000 |
| 8 | -3.009490000 | -2.328460000 | -0.000110000 |
| 8 | -4.778810000 | -1.046980000 | 0.000200000  |
| 7 | -0.691790000 | 2.008760000  | -0.000120000 |
| 7 | -0.955420000 | 3.076830000  | -0.000230000 |
| 6 | 4.140090000  | -1.563310000 | -0.000130000 |
| 8 | 5.324150000  | -1.352240000 | -0.000040000 |
| 1 | 3.720350000  | -2.588030000 | -0.000290000 |

## 88

|   |              |              |              |
|---|--------------|--------------|--------------|
| 6 | 2.922930000  | -0.048250000 | 0.000010000  |
| 6 | 3.079940000  | 1.329550000  | 0.000050000  |
| 6 | 1.787120000  | 1.859600000  | -0.000030000 |
| 6 | 0.877880000  | 0.781460000  | -0.000010000 |
| 7 | 1.611230000  | -0.382320000 | -0.000050000 |
| 6 | -0.553040000 | 0.775530000  | 0.000040000  |
| 6 | -1.459620000 | -0.242940000 | 0.000320000  |
| 6 | -2.906130000 | -0.029180000 | 0.000240000  |
| 7 | -3.728320000 | -1.378660000 | 0.000190000  |
| 7 | 3.918410000  | -1.108650000 | -0.000010000 |
| 1 | 4.018710000  | 1.859230000  | 0.000110000  |
| 1 | 1.539360000  | 2.910390000  | -0.000020000 |
| 1 | 1.302890000  | -1.348750000 | -0.000140000 |
| 7 | -1.083920000 | 2.100270000  | -0.000400000 |
| 1 | -1.106900000 | -1.265750000 | 0.000570000  |
| 8 | -3.490850000 | 1.006340000  | 0.000200000  |
| 8 | 3.474720000  | -2.251470000 | -0.000060000 |
| 8 | 5.082630000  | -0.763480000 | 0.000020000  |
| 8 | -3.057230000 | -2.400100000 | -0.001670000 |
| 8 | -4.922550000 | -1.260120000 | 0.001810000  |
| 7 | -1.423470000 | 3.146610000  | -0.000670000 |

## 89

|   |          |          |          |
|---|----------|----------|----------|
| C | -2.73817 | -0.75382 | 0.00006  |
| C | -2.93038 | 0.61657  | 0.00046  |
| C | -1.65273 | 1.21509  | -0.00035 |
| C | -0.69618 | 0.19964  | -0.00003 |
| N | -1.39491 | -0.99612 | -0.00047 |
| C | 0.72741  | 0.31270  | 0.00014  |
| C | 1.64659  | -0.68301 | 0.00028  |
| C | 3.08324  | -0.39814 | 0.00034  |
| O | 3.58192  | 0.71274  | -0.00026 |
| H | -3.45197 | -1.56207 | 0.00013  |
| H | -3.88506 | 1.11790  | 0.00093  |
| H | -1.42869 | 2.27080  | -0.00047 |
| H | -0.97440 | -1.91071 | -0.00104 |
| H | 1.11070  | 1.32967  | 0.00002  |
| H | 1.36452  | -1.73258 | 0.00037  |

|   |         |          |         |
|---|---------|----------|---------|
| H | 3.73521 | -1.29633 | 0.00010 |
|---|---------|----------|---------|

**90**

|   |              |              |              |
|---|--------------|--------------|--------------|
| 6 | 4.928330000  | 0.687260000  | 0.440450000  |
| 6 | 5.398490000  | -0.567030000 | 0.103650000  |
| 6 | 4.271170000  | -1.371010000 | -0.186030000 |
| 6 | 3.128420000  | -0.593750000 | -0.021280000 |
| 7 | 3.562070000  | 0.662990000  | 0.362630000  |
| 6 | 1.754680000  | -0.970330000 | -0.200870000 |
| 6 | 0.657100000  | -0.202860000 | -0.045560000 |
| 6 | -0.685650000 | -0.787110000 | -0.301000000 |
| 8 | -0.812010000 | -1.947310000 | -0.693140000 |
| 1 | 6.434990000  | -0.863260000 | 0.071760000  |
| 1 | 4.271420000  | -2.407840000 | -0.485580000 |
| 1 | 2.961430000  | 1.446060000  | 0.558520000  |
| 1 | 1.588630000  | -2.000490000 | -0.502010000 |
| 1 | 0.741940000  | 0.837830000  | 0.241870000  |
| 1 | 5.455810000  | 1.583220000  | 0.726130000  |
| 7 | -1.789190000 | 0.013060000  | -0.099180000 |
| 6 | -1.758240000 | 1.377670000  | 0.427350000  |
| 6 | -1.615290000 | 2.463700000  | -0.648900000 |
| 6 | -1.654940000 | 3.876430000  | -0.060080000 |
| 6 | -3.105410000 | -0.551060000 | -0.415620000 |
| 6 | -3.759320000 | -1.277250000 | 0.767070000  |
| 6 | -5.137450000 | -1.838900000 | 0.407750000  |
| 1 | -2.690970000 | 1.535180000  | 0.978450000  |
| 1 | -0.962420000 | 1.472240000  | 1.169790000  |
| 1 | -0.678170000 | 2.306750000  | -1.193130000 |
| 1 | -2.417950000 | 2.343160000  | -1.384140000 |
| 1 | -1.552290000 | 4.633460000  | -0.841400000 |
| 1 | -2.599030000 | 4.064620000  | 0.460870000  |
| 1 | -0.845240000 | 4.033240000  | 0.660250000  |
| 1 | -3.748600000 | 0.266940000  | -0.757750000 |
| 1 | -2.979440000 | -1.247200000 | -1.245560000 |
| 1 | -3.094180000 | -2.086120000 | 1.081410000  |
| 1 | -3.849090000 | -0.588990000 | 1.615930000  |
| 1 | -5.586800000 | -2.356760000 | 1.259000000  |
| 1 | -5.827200000 | -1.045300000 | 0.101440000  |
| 1 | -5.068150000 | -2.555230000 | -0.416440000 |

**91**

|   |          |          |          |
|---|----------|----------|----------|
| C | -3.80576 | 1.05910  | 0.04478  |
| C | -4.26948 | -0.24139 | -0.00062 |
| C | -3.13634 | -1.08700 | -0.03540 |
| C | -1.99647 | -0.28835 | -0.01097 |
| N | -2.43797 | 1.02229  | 0.03752  |
| C | -0.61941 | -0.69185 | -0.02982 |
| C | 0.47612  | 0.09468  | -0.01128 |
| C | 1.82359  | -0.53073 | -0.01553 |
| O | 1.95979  | -1.75274 | 0.01590  |
| H | -4.33935 | 1.99534  | 0.08175  |
| H | -5.30561 | -0.54057 | -0.00750 |
| H | -3.13056 | -2.16551 | -0.07422 |

|   |          |          |          |
|---|----------|----------|----------|
| H | -1.84117 | 1.83174  | 0.06875  |
| H | -0.44768 | -1.76376 | -0.06058 |
| H | 0.38656  | 1.17307  | 0.02911  |
| C | 4.24903  | -0.26234 | 0.08321  |
| H | 4.88960  | 0.06024  | -0.74401 |
| H | 4.71337  | 0.05154  | 1.02599  |
| H | 4.16282  | -1.34559 | 0.07182  |
| N | 2.91608  | 0.31177  | -0.05427 |
| C | 2.83996  | 1.76709  | -0.05670 |
| H | 3.79440  | 2.16151  | -0.40931 |
| H | 2.07124  | 2.12828  | -0.74029 |
| H | 2.65386  | 2.18200  | 0.94255  |

## 92

|   |          |          |          |
|---|----------|----------|----------|
| C | 3.11011  | -0.91390 | -0.01091 |
| C | 3.43737  | 0.42820  | 0.01200  |
| C | 2.22342  | 1.15294  | 0.01939  |
| C | 1.17226  | 0.24048  | 0.00159  |
| N | 1.74625  | -1.01857 | -0.01617 |
| C | -0.23848 | 0.49926  | 0.00221  |
| C | -1.24999 | -0.39104 | -0.00298 |
| C | -2.65563 | 0.07871  | -0.00449 |
| O | -2.97645 | 1.25885  | -0.02530 |
| H | 3.73768  | -1.79058 | -0.02453 |
| H | 4.43710  | 0.83246  | 0.02187  |
| H | 2.10651  | 2.22568  | 0.03647  |
| H | 1.23664  | -1.88592 | -0.03890 |
| H | -0.52006 | 1.54870  | 0.00666  |
| H | -1.07307 | -1.46349 | -0.00931 |
| N | -3.60088 | -0.92086 | -0.00514 |
| H | -4.56611 | -0.64723 | 0.09202  |
| H | -3.35904 | -1.88240 | 0.16639  |

## 93

|   |          |          |          |
|---|----------|----------|----------|
| C | 3.58451  | -0.97843 | 0.00579  |
| C | 3.95741  | 0.35140  | -0.03306 |
| C | 2.76914  | 1.11736  | -0.03599 |
| C | 1.68757  | 0.24158  | -0.00021 |
| N | 2.21813  | -1.03616 | 0.02447  |
| C | 0.28658  | 0.54814  | 0.00765  |
| C | -0.75360 | -0.30893 | 0.02527  |
| C | -2.14024 | 0.20217  | 0.03950  |
| O | -2.44140 | 1.38946  | 0.06235  |
| H | 4.18167  | -1.87602 | 0.02258  |
| H | 4.97022  | 0.72103  | -0.05597 |
| H | 2.68923  | 2.19330  | -0.06226 |
| H | 1.67969  | -1.88542 | 0.06129  |
| H | 0.04196  | 1.60663  | -0.00084 |
| H | -0.61347 | -1.38673 | 0.03749  |
| N | -3.10845 | -0.78111 | 0.03978  |
| N | -4.47097 | -0.46588 | -0.11872 |
| H | -2.86613 | -1.71670 | -0.24920 |
| H | -4.83972 | -0.18953 | 0.78796  |
| H | -4.53141 | 0.36001  | -0.71222 |

**94**

|   |          |          |          |
|---|----------|----------|----------|
| C | -3.09795 | -0.91089 | 0.00005  |
| C | -3.43087 | 0.43136  | 0.00005  |
| C | -2.22096 | 1.15959  | 0.00001  |
| C | -1.16612 | 0.24912  | 0.00001  |
| N | -1.73583 | -1.01218 | 0.00005  |
| C | 0.24122  | 0.50937  | -0.00002 |
| C | 1.24755  | -0.39087 | -0.00001 |
| C | 2.64237  | 0.05627  | -0.00004 |
| O | 3.03892  | 1.20203  | -0.00006 |
| H | -3.72330 | -1.78931 | 0.00007  |
| H | -4.43217 | 0.83161  | 0.00006  |
| H | -2.10777 | 2.23290  | -0.00002 |
| H | -1.22280 | -1.87832 | 0.00006  |
| H | 0.51866  | 1.55970  | -0.00004 |
| H | 1.08479  | -1.46235 | 0.00001  |
| O | 3.50404  | -1.00225 | -0.00002 |
| H | 4.39829  | -0.63102 | -0.00004 |

**95**

|   |          |          |          |
|---|----------|----------|----------|
| C | 3.32569  | 1.10496  | -0.00014 |
| C | 3.81856  | -0.18689 | 0.00022  |
| C | 2.70584  | -1.05634 | 0.00024  |
| C | 1.54778  | -0.28127 | -0.00005 |
| N | 1.96087  | 1.04034  | -0.00023 |
| C | 0.18481  | -0.71729 | -0.00004 |
| C | -0.93291 | 0.04291  | -0.00002 |
| C | -2.25496 | -0.61538 | -0.00004 |
| O | -2.41203 | -1.81350 | -0.00022 |
| H | 3.84007  | 2.05266  | -0.00032 |
| H | 4.86097  | -0.46288 | 0.00043  |
| H | 2.72315  | -2.13542 | 0.00050  |
| H | 1.34844  | 1.83889  | -0.00078 |
| H | 0.04374  | -1.79415 | -0.00006 |
| H | -0.87529 | 1.12379  | 0.00006  |
| O | -3.37254 | 0.17151  | 0.00002  |
| C | -3.30241 | 1.59842  | 0.00025  |
| H | -4.33665 | 1.93891  | 0.00031  |
| H | -2.80416 | 1.97838  | 0.89686  |
| H | -2.80418 | 1.97867  | -0.89625 |

**96**

|   |          |          |          |
|---|----------|----------|----------|
| C | -3.10605 | -0.94353 | -0.00021 |
| C | -3.45868 | 0.39362  | -0.00048 |
| C | -2.25956 | 1.13983  | -0.00023 |
| C | -1.19051 | 0.24568  | -0.00012 |
| N | -1.74218 | -1.02401 | -0.00008 |
| C | 0.21265  | 0.52711  | -0.00001 |
| C | 1.24150  | -0.34977 | 0.00015  |
| C | 2.64352  | 0.11820  | 0.00028  |
| O | 2.94106  | 1.30247  | 0.00020  |
| H | -3.71829 | -1.83116 | -0.00020 |
| H | -4.46587 | 0.77894  | -0.00071 |



|   |          |          |          |
|---|----------|----------|----------|
| H | -2.16211 | 2.21466  | -0.00026 |
| H | -1.21572 | -1.88178 | 0.00004  |
| H | 0.47521  | 1.58182  | -0.00003 |
| H | 1.07892  | -1.42438 | 0.00020  |
| C | 3.71146  | -0.96122 | 0.00040  |
| H | 4.69965  | -0.50375 | 0.00044  |
| H | 3.60447  | -1.60271 | 0.88147  |
| H | 3.60459  | -1.60281 | -0.88060 |

### 97

|   |          |          |          |
|---|----------|----------|----------|
| C | -4.09522 | -1.79619 | -0.27992 |
| C | -4.93793 | -0.91776 | 0.37674  |
| C | -4.19786 | 0.25816  | 0.62894  |
| C | -2.91228 | 0.08059  | 0.12016  |
| N | -2.88148 | -1.18842 | -0.43212 |
| C | -1.80864 | 0.99092  | 0.13479  |
| C | -0.57431 | 0.81060  | -0.38720 |
| C | 0.45499  | 1.86075  | -0.28816 |
| O | 0.26991  | 2.92074  | 0.28944  |
| H | -4.26881 | -2.79649 | -0.64317 |
| H | -5.96581 | -1.10983 | 0.64032  |
| H | -4.54503 | 1.15152  | 1.12506  |
| H | -2.07544 | -1.61026 | -0.86302 |
| H | -1.99626 | 1.94094  | 0.62800  |
| H | -0.29511 | -0.10688 | -0.89626 |
| C | 1.80082  | 1.56628  | -0.96289 |
| H | 1.62423  | 1.41445  | -2.03339 |
| H | 2.41408  | 2.46266  | -0.84919 |
| C | 2.50458  | 0.35281  | -0.38806 |
| C | 2.77776  | -0.77125 | -1.17374 |
| C | 3.42596  | -1.88256 | -0.63416 |
| C | 3.81008  | -1.88498 | 0.70462  |
| C | 3.54421  | -0.76871 | 1.49825  |
| C | 2.89807  | 0.33910  | 0.95659  |
| H | 2.49016  | -0.77404 | -2.22067 |
| H | 3.63434  | -2.74226 | -1.26168 |
| H | 4.31541  | -2.74647 | 1.12635  |
| H | 3.84257  | -0.76054 | 2.54079  |
| H | 2.69538  | 1.20358  | 1.58046  |

### 98

|   |          |          |          |
|---|----------|----------|----------|
| C | -3.08133 | -0.91197 | 0.00001  |
| C | -3.41982 | 0.43029  | 0.00015  |
| C | -2.21451 | 1.16179  | 0.00009  |
| C | -1.15514 | 0.25391  | 0.00003  |
| N | -1.72091 | -1.01014 | 0.00006  |
| C | 0.24645  | 0.52188  | -0.00001 |
| C | 1.26093  | -0.37491 | -0.00004 |
| C | 2.64031  | 0.08339  | -0.00007 |
| O | 3.08429  | 1.18826  | -0.00009 |
| H | -3.70468 | -1.79188 | -0.00002 |
| H | -4.42266 | 0.82634  | 0.00022  |
| H | -2.10486 | 2.23547  | 0.00012  |
| H | -1.20692 | -1.87591 | 0.00005  |

|   |         |          |          |
|---|---------|----------|----------|
| H | 0.51429 | 1.57459  | -0.00001 |
| H | 1.10684 | -1.44670 | -0.00003 |
| F | 3.50319 | -0.99370 | -0.00012 |

**99**

|   |          |          |          |
|---|----------|----------|----------|
| C | -3.44551 | -1.05723 | 0.00001  |
| C | -3.88680 | 0.25390  | -0.00015 |
| C | -2.74116 | 1.07769  | -0.00013 |
| C | -1.61448 | 0.25611  | 0.00006  |
| N | -2.08019 | -1.04804 | 0.00015  |
| C | -0.23689 | 0.63571  | 0.00007  |
| C | 0.85118  | -0.16892 | 0.00001  |
| C | 2.19533  | 0.42568  | 0.00009  |
| O | 2.43410  | 1.61099  | 0.00014  |
| H | -3.99780 | -1.98334 | 0.00006  |
| H | -4.91737 | 0.57113  | -0.00030 |
| H | -2.71542 | 2.15659  | -0.00028 |
| H | -1.50058 | -1.87085 | 0.00064  |
| H | -0.05320 | 1.70635  | 0.00015  |
| H | 0.76981  | -1.24952 | -0.00011 |
| S | 3.61552  | -0.72125 | -0.00013 |
| H | 2.92463  | -1.87957 | -0.00002 |

**100**

|    |          |          |          |
|----|----------|----------|----------|
| C  | -3.40798 | -1.07519 | -0.00012 |
| C  | -3.87479 | 0.22864  | 0.00008  |
| C  | -2.74645 | 1.07276  | -0.00010 |
| C  | -1.60371 | 0.27090  | 0.00001  |
| N  | -2.04517 | -1.04215 | 0.00005  |
| C  | -0.23606 | 0.67298  | 0.00004  |
| C  | 0.85945  | -0.12682 | 0.00010  |
| C  | 2.18653  | 0.46725  | 0.00012  |
| O  | 2.50121  | 1.61486  | -0.00005 |
| H  | -3.94384 | -2.01097 | -0.00017 |
| H  | -4.91125 | 0.52573  | 0.00016  |
| H  | -2.74092 | 2.15198  | -0.00015 |
| H  | -1.45032 | -1.85460 | 0.00013  |
| H  | -0.07198 | 1.74651  | 0.00001  |
| H  | 0.80500  | -1.20680 | 0.00013  |
| Cl | 3.50340  | -0.82581 | -0.00005 |

**101**

|   |          |          |          |
|---|----------|----------|----------|
| C | -3.70767 | 1.07714  | 0.00009  |
| C | -4.19818 | -0.21859 | 0.00003  |
| C | -3.08504 | -1.08288 | -0.00003 |
| C | -1.92750 | -0.30152 | -0.00000 |
| N | -2.34605 | 1.01877  | 0.00004  |
| C | -0.56434 | -0.71847 | -0.00003 |
| C | 0.53746  | 0.07327  | -0.00002 |
| C | 1.87127  | -0.50262 | -0.00005 |
| O | 2.13610  | -1.69902 | -0.00011 |
| H | -4.22657 | 2.02244  | 0.00015  |
| H | -5.24002 | -0.49660 | 0.00003  |
| H | -3.09849 | -2.16203 | -0.00008 |

|   |          |          |          |
|---|----------|----------|----------|
| H | -1.73266 | 1.81776  | 0.00006  |
| H | -0.40556 | -1.79367 | -0.00007 |
| H | 0.49035  | 1.15532  | 0.00001  |
| C | 3.03328  | 0.52630  | -0.00009 |
| O | 2.83588  | 1.73112  | -0.00020 |
| N | 4.24660  | -0.06690 | 0.00027  |
| H | 5.08139  | 0.49605  | 0.00038  |
| H | 4.29620  | -1.07495 | 0.00046  |

**102**

|   |          |          |          |
|---|----------|----------|----------|
| C | -3.26843 | 1.09344  | -0.00008 |
| C | -3.76338 | -0.20072 | 0.00014  |
| C | -2.65368 | -1.06857 | 0.00019  |
| C | -1.49307 | -0.29132 | 0.00001  |
| N | -1.90713 | 1.03075  | -0.00017 |
| C | -0.13326 | -0.71654 | -0.00002 |
| C | 0.97779  | 0.06274  | -0.00022 |
| C | 2.30766  | -0.52612 | -0.00024 |
| O | 2.57316  | -1.72126 | 0.00035  |
| H | -3.78436 | 2.04037  | -0.00019 |
| H | -4.80614 | -0.47505 | 0.00025  |
| H | -2.67071 | -2.14765 | 0.00035  |
| H | -1.29246 | 1.82858  | -0.00032 |
| H | 0.01681  | -1.79300 | 0.00013  |
| H | 0.93666  | 1.14624  | -0.00038 |
| C | 3.49338  | 0.44994  | 0.00006  |
| O | 3.38607  | 1.65049  | -0.00013 |
| H | 4.47417  | -0.06571 | 0.00058  |

**103**

|    |          |          |          |
|----|----------|----------|----------|
| C  | -4.63602 | -1.09974 | -0.00003 |
| C  | -5.19821 | 0.16581  | -0.00009 |
| C  | -4.13527 | 1.09144  | -0.00002 |
| C  | -2.93599 | 0.37707  | 0.00007  |
| N  | -3.27906 | -0.96509 | 0.00005  |
| C  | -1.60124 | 0.87874  | 0.00013  |
| C  | -0.44991 | 0.16337  | 0.00012  |
| C  | 0.83684  | 0.85337  | 0.00019  |
| O  | 0.99080  | 2.05255  | 0.00013  |
| H  | -5.10070 | -2.07285 | -0.00004 |
| H  | -6.25392 | 0.38513  | -0.00017 |
| H  | -4.20959 | 2.16814  | -0.00006 |
| H  | -2.62511 | -1.73078 | 0.00023  |
| H  | -1.51249 | 1.96133  | 0.00019  |
| H  | -0.44698 | -0.91904 | 0.00005  |
| C  | 2.10985  | -0.08125 | -0.00002 |
| Cl | 2.05699  | -1.12878 | -1.47462 |
| Cl | 3.60491  | 0.87181  | -0.00059 |
| Cl | 2.05783  | -1.12829 | 1.47499  |

**104**

|   |          |          |          |
|---|----------|----------|----------|
| C | -3.98674 | -1.12924 | -0.00002 |
| C | -4.51763 | 0.15057  | -0.00002 |
| C | -3.43281 | 1.04862  | 0.00000  |

|   |          |          |          |
|---|----------|----------|----------|
| C | -2.25078 | 0.30412  | 0.00001  |
| N | -2.62777 | -1.02944 | -0.00001 |
| C | -0.90632 | 0.77223  | 0.00003  |
| C | 0.23224  | 0.03310  | 0.00005  |
| C | 1.53415  | 0.68538  | 0.00007  |
| O | 1.74785  | 1.87953  | -0.00004 |
| H | -4.47627 | -2.09011 | -0.00003 |
| H | -5.56759 | 0.39577  | -0.00003 |
| H | -3.47992 | 2.12683  | 0.00001  |
| H | -1.99370 | -1.81179 | -0.00000 |
| H | -0.79160 | 1.85267  | 0.00004  |
| H | 0.21804  | -1.05090 | 0.00005  |
| C | 2.74746  | -0.29268 | -0.00000 |
| F | 2.70870  | -1.09968 | 1.08960  |
| F | 2.70840  | -1.09991 | -1.08943 |
| F | 3.91458  | 0.34567  | -0.00023 |

### 105

|    |              |              |              |
|----|--------------|--------------|--------------|
| 1  | 5.443580000  | 2.140270000  | -0.000050000 |
| 6  | 4.999020000  | 1.157760000  | -0.000030000 |
| 6  | 5.589690000  | -0.096440000 | -0.000010000 |
| 6  | 4.548710000  | -1.043690000 | 0.000010000  |
| 6  | 3.332120000  | -0.355020000 | 0.000020000  |
| 7  | 3.646930000  | 0.994990000  | 0.000000000  |
| 6  | 2.012100000  | -0.883520000 | 0.000050000  |
| 6  | 0.838310000  | -0.195710000 | 0.000060000  |
| 6  | -0.435700000 | -0.901970000 | 0.000090000  |
| 1  | 6.650010000  | -0.291890000 | -0.000020000 |
| 1  | 4.645810000  | -2.118550000 | 0.000020000  |
| 1  | 2.976560000  | 1.746570000  | 0.000000000  |
| 1  | 0.806050000  | 0.888040000  | 0.000040000  |
| 8  | -0.568480000 | -2.118510000 | -0.000020000 |
| 1  | 1.945170000  | -1.968160000 | 0.000060000  |
| 14 | -2.102150000 | 0.084730000  | 0.000000000  |
| 17 | -1.815540000 | 2.142670000  | -0.000600000 |
| 17 | -3.190180000 | -0.415560000 | -1.672070000 |
| 17 | -3.189770000 | -0.414620000 | 1.672620000  |

### 106

|   |          |          |          |
|---|----------|----------|----------|
| C | -3.27041 | -1.09102 | -0.00026 |
| C | -3.73195 | 0.21619  | -0.00001 |
| C | -2.60118 | 1.05394  | -0.00011 |
| C | -1.46008 | 0.24625  | 0.00002  |
| N | -1.90884 | -1.06540 | 0.00038  |
| C | -0.09465 | 0.64267  | 0.00004  |
| C | 1.00576  | -0.15490 | 0.00031  |
| C | 2.34046  | 0.42698  | 0.00035  |
| O | 2.61463  | 1.61440  | -0.00038 |
| H | -3.81169 | -2.02378 | -0.00039 |
| H | -4.76720 | 0.51736  | -0.00003 |
| H | -2.58984 | 2.13311  | -0.00020 |
| H | -1.31851 | -1.88127 | 0.00071  |
| H | 0.07741  | 1.71538  | -0.00012 |
| H | 0.94419  | -1.23787 | 0.00052  |

|   |         |          |          |
|---|---------|----------|----------|
| C | 3.44188 | -0.56571 | -0.00002 |
| N | 4.30450 | -1.33238 | -0.00030 |

**107**

|    |              |              |              |
|----|--------------|--------------|--------------|
| 6  | 4.827480000  | 1.159020000  | -0.000600000 |
| 6  | 5.394090000  | -0.108060000 | -0.000070000 |
| 6  | 4.335980000  | -1.032960000 | 0.000500000  |
| 6  | 3.132330000  | -0.318510000 | 0.000240000  |
| 7  | 3.474330000  | 1.025450000  | -0.000510000 |
| 6  | 1.804690000  | -0.817920000 | 0.000610000  |
| 6  | 0.650830000  | -0.092580000 | 0.000350000  |
| 6  | -0.632030000 | -0.759040000 | 0.000780000  |
| 8  | -0.879790000 | -1.940930000 | 0.000960000  |
| 1  | 6.450360000  | -0.324060000 | -0.000050000 |
| 1  | 4.411250000  | -2.109580000 | 0.001030000  |
| 1  | 2.819650000  | 1.791530000  | -0.000900000 |
| 1  | 1.714450000  | -1.900590000 | 0.001150000  |
| 1  | 0.636140000  | 0.990520000  | -0.000190000 |
| 1  | 5.292680000  | 2.132000000  | -0.001100000 |
| 15 | -2.097960000 | 0.492950000  | -0.000310000 |
| 17 | -3.245530000 | -0.095680000 | -1.615050000 |
| 17 | -3.245850000 | -0.093370000 | 1.615060000  |
| 8  | -1.733000000 | 1.926170000  | -0.001280000 |

**108**

|   |              |              |              |
|---|--------------|--------------|--------------|
| 1 | 4.854750000  | -2.037600000 | 0.000020000  |
| 6 | 4.379170000  | -1.069640000 | 0.000000000  |
| 6 | 4.932250000  | 0.203170000  | -0.000270000 |
| 6 | 3.864730000  | 1.116490000  | 0.000040000  |
| 6 | 2.668470000  | 0.389650000  | -0.000030000 |
| 7 | 3.024650000  | -0.951030000 | 0.000050000  |
| 6 | 1.339350000  | 0.883390000  | -0.000030000 |
| 6 | 0.182610000  | 0.163800000  | 0.000010000  |
| 6 | -1.091250000 | 0.843380000  | 0.000030000  |
| 1 | 5.986080000  | 0.430390000  | -0.000480000 |
| 1 | 3.928810000  | 2.193840000  | 0.000060000  |
| 1 | 2.381510000  | -1.726430000 | 0.000140000  |
| 1 | 0.178720000  | -0.919480000 | 0.000030000  |
| 8 | -1.319430000 | 2.022990000  | -0.000030000 |
| 1 | 1.248520000  | 1.965750000  | -0.000040000 |
| 6 | -3.628930000 | 0.599580000  | -0.000170000 |
| 7 | -4.604450000 | 1.209530000  | -0.000580000 |
| 6 | -2.308840000 | -1.023110000 | 1.205980000  |
| 7 | -2.200660000 | -1.663240000 | 2.157690000  |
| 6 | -2.387850000 | -0.184600000 | 0.000030000  |
| 6 | -2.308640000 | -1.023450000 | -1.205680000 |
| 7 | -2.200860000 | -1.664180000 | -2.157010000 |

**109**

|   |             |              |              |
|---|-------------|--------------|--------------|
| 1 | 5.064220000 | -2.284210000 | 0.000180000  |
| 6 | 4.666690000 | -1.281640000 | 0.000090000  |
| 6 | 5.319190000 | -0.056360000 | 0.000230000  |
| 6 | 4.327670000 | 0.938690000  | -0.000190000 |
| 6 | 3.077150000 | 0.308650000  | -0.000020000 |

|    |              |              |              |
|----|--------------|--------------|--------------|
| 7  | 3.326180000  | -1.056010000 | -0.000180000 |
| 6  | 1.789460000  | 0.900960000  | 0.000000000  |
| 6  | 0.583100000  | 0.263500000  | -0.000070000 |
| 6  | -0.651930000 | 1.015680000  | -0.000080000 |
| 1  | 6.387780000  | 0.086370000  | 0.000450000  |
| 1  | 4.476840000  | 2.007570000  | -0.000300000 |
| 1  | 2.621900000  | -1.776550000 | -0.000270000 |
| 1  | 0.493850000  | -0.816950000 | -0.000120000 |
| 8  | -0.813550000 | 2.212050000  | 0.000060000  |
| 1  | 1.777760000  | 1.987120000  | 0.000010000  |
| 32 | -2.324100000 | -0.173600000 | 0.000010000  |
| 9  | -3.377540000 | 0.026610000  | -1.380950000 |
| 9  | -1.899920000 | -1.885390000 | 0.000000000  |
| 9  | -3.377430000 | 0.026630000  | 1.381040000  |

### 110

|    |              |              |              |
|----|--------------|--------------|--------------|
| 6  | 4.368840000  | -1.243260000 | -0.248530000 |
| 6  | 5.012130000  | -0.084710000 | 0.168150000  |
| 6  | 4.020270000  | 0.887850000  | 0.367890000  |
| 6  | 2.778330000  | 0.311410000  | 0.070540000  |
| 7  | 3.033980000  | -0.999750000 | -0.304390000 |
| 6  | 1.494520000  | 0.904380000  | 0.128440000  |
| 6  | 0.300780000  | 0.309070000  | -0.163250000 |
| 6  | -0.911010000 | 1.060340000  | -0.055350000 |
| 8  | -1.183910000 | 2.179100000  | 0.225770000  |
| 1  | 6.075210000  | 0.028240000  | 0.306920000  |
| 1  | 4.162730000  | 1.906860000  | 0.693630000  |
| 1  | 2.337820000  | -1.673710000 | -0.581750000 |
| 1  | 1.479350000  | 1.944600000  | 0.440350000  |
| 1  | 0.213610000  | -0.719810000 | -0.483740000 |
| 1  | 4.771090000  | -2.210560000 | -0.505030000 |
| 16 | -2.475290000 | -0.112920000 | -0.517490000 |
| 8  | -3.635720000 | 0.695440000  | -0.845250000 |
| 8  | -2.054200000 | -1.221260000 | -1.372600000 |
| 17 | -2.827390000 | -0.974560000 | 1.462910000  |

### 111

|    |              |              |              |
|----|--------------|--------------|--------------|
| 6  | -4.487490000 | -1.084790000 | -0.252250000 |
| 6  | -5.037250000 | 0.179210000  | -0.080460000 |
| 6  | -3.968700000 | 1.074250000  | 0.082770000  |
| 6  | -2.774130000 | 0.345610000  | 0.009030000  |
| 7  | -3.134540000 | -0.978370000 | -0.197210000 |
| 6  | -1.445290000 | 0.820680000  | 0.115400000  |
| 6  | -0.295710000 | 0.087160000  | 0.044480000  |
| 6  | 0.976400000  | 0.733510000  | 0.168960000  |
| 8  | 1.312940000  | 1.875010000  | 0.275770000  |
| 1  | -6.090070000 | 0.410920000  | -0.076160000 |
| 1  | -4.029390000 | 2.140380000  | 0.239300000  |
| 1  | -2.493160000 | -1.749270000 | -0.296480000 |
| 1  | -1.348270000 | 1.891410000  | 0.270140000  |
| 1  | -0.287100000 | -0.983550000 | -0.116340000 |
| 1  | -4.966680000 | -2.038390000 | -0.408170000 |
| 16 | 2.417140000  | -0.589670000 | 0.199960000  |

|   |             |              |              |
|---|-------------|--------------|--------------|
| 8 | 2.846090000 | -0.845530000 | 1.570640000  |
| 8 | 2.129680000 | -1.693610000 | -0.715590000 |
| 6 | 3.719960000 | 0.385840000  | -0.564910000 |
| 7 | 4.577970000 | 0.953740000  | -1.087990000 |
